# Supplementary material for: Time-dependent cytokine and chemokine changes in mouse cerebral cortex following a mild traumatic brain injury
Source: eLife. 2020 Aug 17;9:e55827. doi: 10.7554/eLife.55827 (PMC7473773; doi:10.7554/eLife.55827)
Supplement: Figure 1—source data 1. [file elife-55827-fig1-data1.xlsx]

## Sheet: Figure 1 8 & 24 hrs
Source data for Figure 1	% increase from sham values
Protein		MIP-3b				SLAM				VEGF-B				CRP				IL-33				Fcg RIIB				Eotaxin-2				IFNg R1				MIP-1g				MMP-2				Chemerin				MBL-2
Time point	sham	8 hours	24 hours		sham	8 hours	24 hours		sham	8 hours	24 hours		sham	8 hours	24 hours		sham	8 hours	24 hours		sham	8 hours	24 hours		sham	8 hours	24 hours		sham	8 hours	24 hours		sham	8 hours	24 hours		sham	8 hours	24 hours		sham	8 hours	24 hours		sham	8 hours	24 hours
	-14.8564	107.821			-18.886	11.4201			-19.0912	90.8558	22.3287		66.5896	115.249			-35.6132	-58.3095			-37.8601	79.9693			102.489	102.885			34.7702	30.2132			-9.18531	192.591			-24.7116	-61.8945			40.1194	-0.506269	-58.3752		-36.5884	-31.4029
	62.3721	182.69			54.5495	-2.383			3.60288	131.964	45.5762		-65.6594	148.5			-35.2896	-32.2032			-54.129	-1.02976			10.0386	82.7907			38.099	-27.2448			0.405978	-21.8469			39.529	9.96609			-11.1793	26.6389	-71.0052		-44.1194	-3.16014
	46.3413	197.941			-37.4216	222.182			-5.85538	11.105	33.6416		-73.0976	-16.1656			-12.0434	109.149			-60.2233	-4.6691			15.3958	26.8852			-33.0748	49.2412			-9.66287	40.3962			42.0399	12.5386			-12.1033	25.3794	-68.3267		-18.1285	-17.8986
	-52.2512	29.0099			24.6402	216.76			28.1325	203.447	68.6993		-77.4491	124.255			-16.1424	58.7378			-54.1053	-4.82651			-27.5871	20.6398			-58.6174	9.56124			6.3127	64.7651			-10.633	62.6089			-35.4874	-0.952886	-56.1805		-15.1157	-13.5859
	-13.3433	-20.9963			-48.1226	369.766			-1.83316	327.303	106.492		17.5318	52.8624			-57.6357	145.365			-50.4654	143.412			147.451	-34.4197			-73.712	64.6944			29.7771	32.436			42.6343	78.739			-78.811	112.849	-54.237		35.097	93.946
	50.9834	225.62			21.3601	194.579			-4.95214	355.165	20.8369		-71.8453	119.899			34.6387	127.978			-43.2173	84.9229			74.4272	34.7181			31.9457	112.808			-14.7988	-24.9584			-26.0889	40.8529			-51.551	87.5208	-37.885		-0.130027	144.565
	-0.352843	486.236			-1.68913	256.377				37.8923	-22.55		116.132	27.0845			34.8112	206.993			-19.231	-4.7933			11.9835	1.02756			-19.1068	93.4356			-3.57515	21.5412			24.8113	100.904			-15.8566	109.44	-34.9963		-29.7944	-3.23199
	-89.6589				-3.94367	75.0124				-24.0437			114.907	62.4915			2.9557	8.61609			49.9639	121.797			32.9655	87.6369			73.2302	84.0184			19.0621	-12.8202			-38.7802	44.6633			15.1729	54.2732	-51.2835		-37.1084	81.7663
	12.4424				-3.87248								-50.0585	212.697			-16.6988	33.7444			15.1866	76.9573			13.3698	73.497			14.3186	17.5393			-47.6027	76.8171			4.60607	69.5438			66.0566	22.4411	-58.2786		-33.7002	58.8567
	-1.66775				-51.0171								-54.6358	270.532			-5.82018	102.291			-24.6852	55.8067			-8.98293	123.655			-10.1572	82.6696			53.9991	62.7143			61.4866	157.91			5.81798	79.3329	-55.3972		-40.2118	81.621
					64.4119								50.9615	36.6511			-8.29775				82.7087	107.719			-59.4276	27.6688			45.3282	54.4473			10.6577	-23.6676			-29.0098	30.4924			18.4186	95.3725			-13.4135	27.9909
													-11.5359	89.0904			73.1048				19.8056	-16.0513			3.06848				-3.67133	10.8217			-27.4079	159.137			-12.9803	0.657117			15.1162	-66.25			54.8048	103.594
													-25.9288				41.5587				39.5603				-70.6037				-19.5312				-56.5916				-36.8171				20.6098				-12.3218
													43.4268								2.78455				-22.2481				-43.1219				44.9531				-8.14722				-18.7531				42.953
													25.3252								41.5944				-74.5028				-50.9672				-51.7298				-37.6186				-28.5815				21.8675
													-46.2425								-48.3852				-80.4402				41.2487				-28.2375				12.4492				32.3137				-1.63672
													27.9534								4.3518				-9.75435				32.8465				28.9289				-2.63385				38.6975				61.2861
													13.0282								136.346				-57.6308								54.7037												66.3992
Protein		TROY				gp130				Gas 1				Testican 3				BTC				DAN				PDGF-AA				Lungkine				bGFG				Progranulin				Fas L				MIP-1a
Time point	sham	8 hours	24 hours		sham	8 hours	24 hours		sham	8 hours	24 hours		sham	8 hours	24 hours		sham	8 hours	24 hours		sham	8 hours	24 hours		sham	8 hours	24 hours		sham	8 hours	24 hours		sham	8 hours	24 hours		sham	8 hours	24 hours		sham	8 hours	24 hours		sham	8 hours	24 hours
	-21.2182	70.4989			-7.92388	-4.03616			0.0696072	39.3614	1.27224		13.8602	11.0486			-20.8546	26.6699			22.8131	21.1282			108.645	29.3028			16.4108	30.0468	8.89753		3.33795	10.119	-14.0357		9.47614	13.9241			-9.54724	-45.1227	2.05959		-81.0042	-89.5667	-35.4328
	-18.2509	77.1112			10.6437	21.012			7.45528	69.8542	-0.197898		30.5563	11.538			-37.6074	1.61416			-37.1228	16.6429			-49.0088	46.7343			2.12071	4.63811	60.8866		14.8031	23.7872	-21.483		-35.0277	-2.50771			27.9158	-46.8322	-48.1274		-78.4096	-79.216	-83.3816
	-37.8131	45.6354			-56.7871	-21.0136			-25.5631	16.7107	-5.59978		-77.282	-2.82625			-73.4146	-22.1602			-25.1888	27.8129			-11.7105	14.2824			16.4708	72.1339	-0.461187		-33.5438	-2.65345	4.3293		-33.085	10.1933			84.8973	-27.4685	19.5289		-90.508	-17.8173	-50.0717
	-18.1135	54.6634			-53.1102	-17.0726			-13.9807	47.5665	20.0914		-39.6285	-11.4903			-48.9281	15.3791			-27.7989	21.2168			-34.1709	15.1603			-15.7155	27.7002	9.36815		-39.0315	-1.15339	6.93597		-24.9631	17.8893			56.6768	-0.559266	-32.5829		92.6257	-74.4255	-66.5803
	23.597	49.9176			-70.6668	91.8598			17.6568	9.89935	43.7632		-68.5797	66.834			-40.8128	52.4298			-47.1923	37.2097			-58.1093	29.4881			-12.8646	26.1088	7.09141		-17.7771	30.6725	35.3816		-34.6665	16.0162			110.841	29.339	-77.8788		61.3043	-25.5997	-43.7368
	8.19208	-1.3818			-40.8481	72.8414			-12.4518	-4.21731	42.3137		-40.0692	77.109			3.54599	44.5779			-39.5902	10.0996			-40.3178	33.8187			-12.8761	5.86669	53.7688		-46.0826	12.4661	32.1169		-48.0805	2.69883			25.4799	-31.4937	-69.1597		207.954	-19.3761	-75.7239
	-0.269077	49.9332			-2.93588	60.5154			24.6245	53.6346	48.2483		-19.6267	54.0696			-4.38168	112.649			1.67311	28.2795			0.890733	34.8611			37.7897	-8.33743	6.78598		18.2597	28.446	42.6222		-5.97319	27.0513			-16.2199	-0.160026	-70.9728		-74.3356	-51.0245	-76.0563
	-6.13328	20.4454			12.6275	65.673			22.9081	2.69447	33.4263		0.95846	37.0221			29.4626	44.2587			21.2063	22.7083			10.8525	10.6402			-11.3079	-7.05837	2.32122		27.5858	4.98848	24.6623		-10.2408	20.4105			-16.3138	-40.2804	-46.5025		-43.5059	-91.0319	-67.9908
	3.37817	74.8705			20.4969	53.4397			23.8112	69.4036	20.6231		46.505	43.6796			0.00779112	50.7911			25.2682	22.7684			35.9254	18.7442			0.189847	42.8068	53.0874		19.3439	47.3467	13.4462		12.9452	20.1218			-28.5402	-45.4901	-55.1793		-88.938	-69.6037	-63.7549
	-3.99484	49.5416			21.5245	71.6605			59.1293	-4.65377	11.6335		41.1768	32.8366			35.0599	59.1725			4.8992	19.4095			-1.57661	17.1105			-7.93822		34.2758		34.8061	14.2846	8.95541		-19.2053	12.3754			-34.7817	-32.9542	-67.0221		-57.0466		-78.8964
	30.8473	5.37176			33.2437	43.026			-18.0089	69.1096	46.7281		20.004	66.8674			6.23759	21.2509			-30.0967	48.6382			14.6423	3.67539			-12.2875		7.97841		11.1106	20.8255	48.7284		-11.6345	33.2275			-9.91725	-44.7291	-73.6083		-39.6655		-81.6414
	12.8911	4.57817			66.4168	24.5919			-7.02566	68.1461	48.5926		14.4234	35.5257			9.80288	4.25208			-4.79865	18.5023			-16.7872	17.5733					0.859332		3.78149	27.6924	63.8285		18.5486	24.9901			4.82357	-78.0795	-81.4749		-48.7277
	-11.8405				2.41891				-22.0523				14.7277				52.8757				-4.13993				-13.6137								5.86324				12.7069				-78.9836				87.7065
	4.48132				29.7394				-8.71959				30.714				5.7234				21.2706				-5.15809								2.48663				46.6084				47.2909				176.21
	-15.5657				-22.9711				-37.2057				-25.9333				28.2228				39.2455				-8.46525								-13.3723				42.8844				-67.0982				-8.11809
	34.7199				-45.9833				-35.2132				-11.4483				38.0499				35.4894				-31.6586								-11.8786				36.8494				-31.6576				3.79294
	15.091				40.0588				10.078				37.7199				16.975				22.6998				66.9267								-7.16084				19.4776				-64.6655				10.9843
					64.1954				14.4934				31.9336								21.3562				33.3227								27.4675				23.3087				-0.200875				-30.3209
Protein		CD6				E-Cadherin				Galectin-3				CD27				Decorin				MCSF				Galectin-1				Periostin				Adiponectin				Fractalkine				Neprilysin				JAM-A
Time point	sham	8 hours	24 hours		sham	8 hours	24 hours		sham	8 hours	24 hours		sham	8 hours	24 hours		sham	8 hours	24 hours		sham	8 hours	24 hours		sham	8 hours	24 hours		sham	8 hours	24 hours		sham	8 hours	24 hours		sham	8 hours	24 hours		sham	8 hours	24 hours		sham	8 hours	24 hours
	-90.6136		-27.7667		-75.2004		40.6507		-25.9477		80.2887		-0.0816772		130.611		-27.8926		5.51052		-4.15702		18.5184		-19.7165		17.0717		12.5956		-5.01216		-35.3669		-29.3907		27.9664		-3.47257		-8.41672		-20.0632		-7.75762		13.9147
	-86.1672		49.432		-21.5687		27.2321		-1.05728		45.0214		16.3729		101.007		15.3361		32.8514		14.255		51.9583		0.123053		14.4024		37.352		-29.6159		28.2356		-16.7378		53.103		-19.2705		-0.0907197		-3.01162		7.26204		12.1085
	-34.3023		32.8652		-10.2671		55.412		12.1467		91.6471		56.7781		110.906		-24.9274		10.9741		-8.75256		1.04604		-9.56047		21.9351		-5.04227		-13.58		-4.88743		-16.9852		56.0121		12.8366		-16.1632		-17.7358		-7.95302		5.5385
	-40.0202		69.2603		-16.0403		35.0798		-19.7554		69.9996		-18.1901		-31.2931		6.29595		22.1687		-2.0449		46.5108		-20.6894		23.5303		-2.01244		-16.3735		-9.7462		-9.05129		34.2657		-1.60553		-14.2653		-7.43278		-6.01395		25.95
	-58.3737		41.078		1.10088		35.5512		141.584		100.52		-20.4484		-43.5565		20.3452		44.9754		25.4326		15.0615		26.8605		23.7345		17.3641		-33.8505		53.172		-13.6964		12.691		-35.3224		-17.3824		-12.3028		-19.6018		-31.6373
	-62.388		88.2547		44.8413		116.034		96.6063		93.0008		31.2212		127.099		40.3663		42.0168		-3.01145		43.271		0.53517		10.9199		18.3453		2.8159		39.3565		-22.0127		-10.0132		-13.13		2.51153		-20.6914		-14.241		-33.0418
	43.2222		118.587		1.07077		111.078		73.0779		87.5109		36.5522		16.0209		41.7599		17.7157		9.51133		-12.374		20.3603		15.6615		-15.4064		4.16075		20.2811		-18.5237		-26.6867		-31.5592		16.5484		-10.683		34.5238		-29.419
	46.3832		198.359		45.573		133.474		35.7985		13.8237		3.58066		-14.8377		-15.3642		-12.683		5.31248		15.5515		8.00981		8.80006		-16.6133		-24.372		-6.05319		-30.5805		-13.7844		-26.0009		22.2902		-36.9123		29.6274		-38.0361
	-12.4937		232.679		12.0029				60.842		-29.1423		-62.3596		44.9106		20.6998		-7.30604		11.8492		24.2037		15.8076		-1.26718		23.8262		-20.014		22.4775		-27.414		-10.3643		-12.8757		51.1507		-12.1224		18.9295		-43.5966
	53.0899				-9.71982				13.6722		34.9823		-1.06492		20.4056		-1.67498		48.5107		0.731866		-2.60659		19.2795		6.39361		13.1378		-14.4652		14.2758		-18.4882		6.40976		-38.4371		-10.5126		-35.9426		43.4122		-38.2394
	78.3159				28.4742				-63.386		33.1982		-15.6236		103.335		-35.2563		25.9319		-21.5612		-5.603		-11.7366		26.1274		-30.036		-20.4666		-18.8547		-9.64098		-15.1206		-22.1768		13.7932		-15.1306		1.48527		-28.8514
	102.157								-50.7476		47.6352		-26.7372		100.524		-0.120207		15.4825		-14.2635		9.54246		-7.77572		21.0404		38.1156				-14.9826		-2.29846		-10.0527		-30.8079		-9.68682		-35.0874		1.23127		-45.1088
	61.2217								-60.6855								-30.966				-9.14926				-7.56				-23.5729				-22.5345				-21.7386				7.26923				-18.9515
									-12.073								-16.9231				-2.62625				10.0319				-0.966235				6.33677				-20.2681				-37.5465				-0.266902
									-40.8228								0.101916				-27.3808				-11.9584				0.309767				-13.7562				-21.6887				19.3724				-24.0126
									-68.7638								-33.7441				15.3805				-17.6936				-55.3636				-27.8807				-20.586				-0.0461294				-18.5594
									-49.8735								26.6418				10.3474				2.57864				-4.63258				-15.1614				-9.81787				-18.8536				-2.56462
									-40.6163								15.3216								3.10433				-7.28105				-14.6495				-10.323								-16.5486
Protein		MIG				TCK-1				IGFBP-6				Dtk				IL-4				IL-10				IL-15				BLC				TCA-3				IL-1b				IFNg				CXCL16
Time point	sham	8 hours	24 hours		sham	8 hours	24 hours		sham	8 hours	24 hours		sham	8 hours	24 hours		sham	8 hours	24 hours		sham	8 hours	24 hours		sham	8 hours	24 hours		sham	8 hours	24 hours		sham	8 hours	24 hours		sham	8 hours	24 hours		sham	8 hours	24 hours		sham	8 hours	24 hours
	-6.66978		-19.9657		0.736697		-31.7779		16.0387		-33.3823		-13.9669		-29.6677		52.0171		-55.0877		41.8573		-41.3954		24.2672		-0.831562		5.25873		-49.0831		38.5425		-7.95475		46.6947		-40.7643		18.9678		-33.1597		-5.50082		-33.4755
	-16.5885		-1.54001		-18.5042		-27.4379		-9.77035		-30.7047		4.90314		-50.0545		-37.9994		-40.9512		-36.7857		-19.2561		-5.9357		-26.8249		-20.2132		-18.9177		-27.0199		-37.5631		-63.3332		-52.3267		-36.2662		-43.0277		66.0961		-42.0595
	-19.9915		-11.6925		-61.5793		-38.23		-57.8977		-19.5666		-30.7949		-50.1326		-55.2808		-53.0195		-55.041		-50.628		-24.7208		-53.2914		-14.2211		-38.6711		14.4055		-40.441		-60.6727		-38.3764		-36.1079		-29.3024		-30.7225		-23.4224
	27.1419		-34.8131		7.58054		-16.3741		-32.8512		-28.4153		-32.5887		-54.8468		-30.8636		-26.2143		-28.3738		-26.8973		-9.31184		-23.8555		11.3418		-35.7559		-23.6961		-42.1494		-69.7728		8.50105		5.59476				48.1743		-38.0241
	5.32957		-15.7095		-33.4087		-39.5118		-49.9979		-35.5225		-32.6529		-15.2852		-48.7097		-22.9584		-49.1921		-49.4356		-52.9832		-35.7462		-1.96695		-34.8548		-39.257		-44.9195		-7.99222		-16.517		29.2356				86.9952		-21.504
	44.9623		-2.44239		-54.4466		-34.819		-45.9072		-3.33871		-14.2641		9.81571		-74.8235		-11.3251		-52.7514		5.72569		-38.5419		-32.74		32.6787		-12.5243		-52.448		-19.2002		33.1221		-29.5142		27.4825				16.656		-42.2468
	-11.2378		-29.8697		23.7567		-22.919		2.70251		-11.3459		-13.5488		-10.0672		-28.1779		-20.4213		-22.4873		-27.2279		7.97619		-30.3191		-14.7223		-24.1254		9.39613		-34.0872		-35.9723		-23.7369		6.97991				-29.533		-38.0995
	-1.9136		-36.6578		26.6342		-27.7812		-8.25958		-43.3698		22.1447		-17.137		-9.90126		-25.795		-3.45345		-15.2767		7.17886		-32.8367		-5.3035		-24.0177		-16.1137		-3.82711		-7.90561		-7.33687		-4.09416				-41.2558		-28.5125
	-24.3055		-18.5493		67.6762		-2.88996		94.0855		4.96848		17.0502		2.56089		31.1645		15.0364		34.5903		3.22026		28.5205		3.98921		-13.1916		-22.8798		35.3003		-25.2577		-14.4862		-55.1978		-22.8221				-1.46504		-34.2884
	-28.113		-34.2571		36.5579		21.3343		54.6242		-35.5324		48.2393		1.36063		1.25055		-8.03254		17.8106		-15.482		16.7573		-25.1844		-18.4553		-12.7029		1.29285		-18.0845		9.00219		-63.9651		-2.02777				-6.24909		-35.7698
	11.9246		-14.0662		28.7283		-24.3876		23.6942		-13.0831		34.3026		-17.5344		56.8163		-41.195		36.0781		-53.9329		23.323		-36.3533		-4.44135		-36.3248		16.2407		-48.781		41.6757				-4.90318				11.7171		-54.2109
	20.9751		-18.0229		6.18204		-35.8926		16.9656		-31.9121		19.8152		-60.9886		51.3503		-15.9125		30.7841		-55.2131		55.0172		-55.9623		36.0109		-41.8793		35.8287		-51.338		45.2635				17.9616				2.06338
	-1.62824				-9.20709				7.83762				3.96055				10.9522				29.7896				15.9936				8.13325				19.6985				46.063								-20.1981
	49.7706				-12.0029				1.87841				-15.8411				19.0395				25.5702				4.10638				30.8369				15.0902				12.3747								-13.9016
	-22.9676				-28.2235				-21.2463				0.914512				8.58371				-8.41448				-16.6825				-10.9656				-10.2085				25.9183								-27.6522
	-10.8596				-52.0982				-16.4412				-25.723				9.83532				6.64546				-16.7425				-2.99366				4.31048												-28.7434
	-13.726				56.6513				13.3046				28.0498				11.6444				17.3897				-5.67517				-11.8102				-3.73061												-18.2964
	-2.10281				14.9729				11.2394								33.3086				15.9835				-12.5466				-5.97199				-17.6473												-8.19635
Protein		GITR				TWEAK R				CD36				IL-6				MFG-E8				Eotaxin				IL-17				CD30L				IL-5				Granzyme B				E-selectin				IL-20
Time point	sham	8 hours	24 hours		sham	8 hours	24 hours		sham	8 hours	24 hours		sham	8 hours	24 hours		sham	8 hours	24 hours		sham	8 hours	24 hours		sham	8 hours	24 hours		sham	8 hours	24 hours		sham	8 hours	24 hours		sham	8 hours	24 hours		sham	8 hours	24 hours		sham	8 hours	24 hours
	-24.3961		3.4111		39.0338		11.556		-16.2928		-82.9917		50.3981		-55.4069		1.2976		-45.8545		38.0846		-77.1295		45.3756		-47.8761		-24.9603		-54.5255		54.5807		-46.5359		0.256022		-36.8273		86.2695		-50.4075		-39.8043		-67.3247
	3.84518		-56.7799		33.3452		14.8441		2.58747		-57.7768		-75.3733		-27.2707		-25.2867		-38.4591		-83.3588		-77.0523		-48.3776		-57.608		-5.04747		25.782		-62.0855		-62.211		41.141		-89.1198		-53.7566		-48.4013		-69.1588		-71.5946
	88.7222		-49.6062		73.7637		23.4376		-55.1983		-62.4535		-37.5302		-24.4574		-66.1954		-58.8136		-86.1409		-73.8893		-46.9951		-64.7177		-76.7835		2.51959		-52.9334		-6.08479		44.4544		-52.8719		142.764		-56.5429		-17.1227		-1.82902
	19.9719		-52.1796		7.93343		18.3135		-28.5479		-17.0005		-0.0127191		-44.0848		-55.229		-31.6115		-81.7732		-72.6293		-19.5507		-15.696		6.92353		-66.9412		-52.5685		-58.771		-36.8835		-45.7066		13.1594		-42.7854		-58.2411		-52.27
	64.6446		-44.5619		28.1882		-63.9934		-18.0712		-68.6264		11.9497		-19.7638		-45.626		-40.0196		-74.172		-42.1482		0.44893		-50.9487		86.3378		-48.5484		-31.9676		-62.9144		14.7585		-63.1861		-26.8825		-44.3974		-39.0347		-47.4061
	-2.33766		-57.3512		-13.1594		-79.0239		-18.812		2.87589		73.6757		-54.8452		16.9404		-41.1687		-82.3		-22.2185		15.1235		-52.688		126.813		-56.8542		41.2437		-25.0784		-38.8377		-1.0312		-62.2145				73.2338		5.76886
	-22.1262		-58.7738		-7.62689		-17.8674		-18.6097		-75.846		18.5426		-20.2849		22.8424		-16.8928		-63.3792		-17.5695		8.9462		-15.3571		-44.3226		-88.6318		-23.1577		-48.197		2.71817				-80.1949				-29.5153		-56.6727
	-27.6112		11.3708		-8.99375		-55.6056		76.5125		-51.365		7.8008		-42.7292		36.2219		-41.8338		-46.4339		-29.4911		17.0462		-29.077		-10.9771		-60.813		43.8475				-23.7573				2.33784				-71.6791		-74.9744
	-5.3328		-41.7723		4.89143		-85.7478		59.8727		11.572		16.3154		-54.3943		18.8049		-41.0372		54.6712		22.2059		64.2641				-71.5933		-56.5818		-1.75142				-50.8518				-5.46917				47.3593		-74.1013
	-34.6669		-20.8385		24.4456		-66.0941		60.8844		-38.0074		-13.5207				49.7731		-29.966		-34.5602		-4.20732		-2.80032				-30.2948		-39.9583		21.2459				42.5567				-65.5993				-55.7335
	-13.2026		-33.8455		-4.85565		-70.1633		-49.46		21.8515		33.8608				15.7037		-38.2743		88.8618		-46.8392		19.5593				-8.9552		-26.5922		22.702				4.25664				77.638				107.353
	-14.7925				-19.9417		-74.34		67.8128				-39.3882				47.4821		-43.3042		115.251		-48.7087		-26.7461				8.18644		-57.969		-16.1921								-34.5861				80.5843
	-1.06381				-39.5087				-28.9765				-3.87097				8.27544				56.8995				-0.000387672				39.7216				7.96938								6.53792				63.2828
	2.7126				-36.6862				34.7082				-33.9774				-13.381				82.9466				-23.4009				62.3291				30.7843												19.5449
	-61.4638				-14.7657				-41.7291				-8.86897				-29.9528				-8.05933				-2.84509				-36.3132				18.2946												-15.4509
	-1.45984				-34.0496				-45.3593								-34.7052				33.9718								-7.0653																-32.3511
	-13.3271				-1.60722				-30.8388								20.4399				51.7658								6.51167																-2.41514
	41.8841				-30.406				49.7144								32.5949				37.731								-20.5114																39.1595
Protein		Artemin				IL-1 R4				IL-13				IL-7				Galectin-7				TECK				ADAMTS1				MMP-10				G-CSF				THPO				HAI-1				MCP-5
Time point	sham	8 hours	24 hours		sham	8 hours	24 hours		sham	8 hours	24 hours		sham	8 hours	24 hours		sham	8 hours	24 hours		sham	8 hours	24 hours		sham	8 hours	24 hours		sham	8 hours	24 hours		sham	8 hours	24 hours		sham	8 hours	24 hours		sham	8 hours	24 hours		sham	8 hours	24 hours
	-0.876203		-35.2746		-19.6597		-1.02364		-40.391		-61.8298		-37.6332		-59.3768		11.6608		-52.2182		136.446		-65.8535		-55.4848		-4.46115		30.3021		-84.4157		-12.9292		-66.7373		28.828		-52.8259		13.4917		-82.1286		54.9577		-71.7986
	42.2824		-65.5489		-31.217		-13.4683		-63.2744		-44.3991		-48.6899		-82.5944		88.0758		-42.3967		-58.6453		-40.1991		68.3531		-81.7807		-44.4458		-64.2254		-19.9381		-65.905		-43.29		-74.2172		115.866		-79.2243		-72.948		-60.4456
	15.727		-47.9843		45.8017		-18.477		-91.8379		-82.7806		-91.2122		-92.1365		-15.3722		-61.2944		17.1794		-62.0682		-44.4661		-80.1545		-39.9396		-78.7427		-3.36887		-68.157		-86.0402		-58.4518		-36.593		-38.8417		1.02814		-85.9012
	-45.931		-54.1313		-47.3876		-27.7		-5.06745		16.8335		-43.7086		17.9895		-27.2459		-49.2801		-58.7046		-72.5048		-62.5911		-11.8734		38.3007		-86.1879		-90.884		-70.0392		-48.6791				38.2868		-73.0293		72.3088		-81.6075
	-25.8731		-29.7377		-21.9753		-67.8109		-15.6706		-80.3564		-31.3942		-94.5409		68.8075		-66.948		76.9836		-15.3557		92.5921		-70.3381		-49.8807		-56.9651		-21.1187		-98.4513		-69.7947				25.3967				34.2415		-63.2433
	-25.6113		-74.8989		-25.1315		-71.7703		-6.27728		-90.5828		-45.927		-81.9731		3.9953		-52.6921		7.45939		-38.7446		-39.5473		-82.1372		-36.9625		-69.1307		-8.98593		-10.7748		10.8269				-36.3944				1.36407
	-51.3553		-36.3765		34.8471		-45.1304		63.2552		-47.5381		78.1706		-9.24461		-7.29322		-66.4105		70.8617				-75.6425		-78.6053		-1.91234		-76.7394		-91.8409		-52.0335		-49.7753				-24.2428				-24.1194
	-36.0827				10.0675		-70.1208		17.0208		-43.5693		4.32216		-20.0702		-20.2529		-28.7894		70.0798				-1.47905				3.24067		-9.65879		-53.2012				-45.4907				-70.981				-39.6343
	40.7646				51.8505		-68.9072		-50.8003				97.0194		-51.3711		-30.976		-45.4967		24.2983				-59.0445				-8.20257		-18.8395		-16.2413				175.984				4.23016				-31.5188
	-29.9936				32.3048		-74.4931		106.083				47.5409		-61.0416		35.5998		-79.3568		-35.8947				60.2551				34.0332		-55.7522		114.677				89.3124				-0.209979				70.2116
	82.573				-3.51769		-74.8814		49.2404				138.502		-65.2125		25.8815		-64.977		-26.1224				-50.8359				32.1781		-60.6316		145.858				38.1572				-28.848				23.9276
	55.2207				25.4261		-91.192		165.716				112.568				-47.7662				-57.9961				49.7061				0.000373534				-31.8487				76.0853								30.1622
	32.1348				-21.3494				-55.7984				-61.4428				-20.2488				-76.0512				-2.17748				2.19099				-26.2235				-27.6174								-33.1341
	2.63218				-7.58853				-48.7559				-14.4707				-39.3089				-44.6667				120.359				1.99995				101.123				64.8066								-54.7044
	11.7691				-17.2796				30.2912				-80.252				9.58926				-33.1672								-22.6067				14.9225				-44.6638								21.8459
	-12.5801				15.0652				-9.55512				-40.536				-35.2118				-11.6702								-7.19314								-58.2655								37.3093
	-33.7852				-19.7381				-44.1777				17.1451				0.0142315												69.4648								-24.7183								-91.2989
	-20.61				-0.51871																																14.3341
Protein		IL-12p40				IL-1ra
Time point	sham	8 hours	24 hours		sham	8 hours	24 hours
	107.98		-74.4578		69.2291		-69.4166
	-81.1746		-89.7943		-12.6567		-66.0398
	-79.5083		-78.6329		-13.0682		-87.5545
	-83.1188		-86.5409		25.5753		-69.028
	-73.9651		-75.8932		-66.4429		-84.0684
	-40.5305		-82.3807		-26.1696		-75.7509
	-10.476		-64.0847		103.071
	91.4219		-45.8579		-10.9444
	-24.8287				22.6798
	117.244				-54.9812
	56.0292				-64.6896
	27.1563				-33.1078
	14.6459				30.9763
	-44.5153				30.5199
	1.24811
	4.44842
	17.9426
