# Supplementary material for: Time-dependent cytokine and chemokine changes in mouse cerebral cortex following a mild traumatic brain injury
Source: eLife. 2020 Aug 17;9:e55827. doi: 10.7554/eLife.55827 (PMC7473773; doi:10.7554/eLife.55827)
Supplement: Figure 2—source data 1. [file elife-55827-fig2-data1.xlsx]

## Sheet: Figure 2 48, 72 & 96 hrs
Source data for Figure 2	% increase from sham values
Protein		OPN					CRP					E-Selectin					IL-17E					CD48					Renin 1					OPG					CD40L					Lipocalin-2					BAFF R
Time point	sham	48 hours	72 hours	96 hours		sham	48 hours	72 hours	96 hours		sham	48 hours	72 hours	96 hours		sham	48 hours	72 hours	96 hours		sham	48 hours	72 hours	96 hours		sham	48 hours	72 hours	96 hours		sham	48 hours	72 hours	96 hours		sham	48 hours	72 hours	96 hours		sham	48 hours	72 hours	96 hours		sham	48 hours	72 hours	96 hours
	52.0909	199.7				66.5896	31.0804	-45.5848	89.5308		-75.2004	125.611		159.89		-91.4733	242.369	70.8464	339.042		-60.5314	256.64				-17.4369	57.9103				-73.6916	185.387				-71.9382	35.6906				-52.516	41.5198				-61.9552	112.846		49.5439
	36.1461	50.2864				-65.6594	302.517	-43.5517	166.844		-21.5687	104.584		9.5089		-23.4255	43.5109	2.19739	278.988		-47.7455	97.0024				56.062	-49.3286				-62.7088	98.9736				-73.6462	37.4034				43.3779	46.6562				-37.5528	12.2945		67.5114
	-59.5791	288.903				-73.0976	237.223	-7.47148	68.3632		-10.2671	-4.62388		39.6769		-62.6924	53.8539	83.811	73.1594		-54.7717	32.7233				-56.8893	158.081				-46.1873	116.245				-26.7646	161.173				107.816	147.086				-61.6427	137.883		33.5204
	-56.1156	458.396				-77.4491	8.03748	182.153	109.244		-16.0403	78.2704		118.969		-37.953	-2.27414	49.0366	50.7369		-52.9668	178.744				-85.1402	381.298				-78.4593	64.453				-83.9458	29.7528				81.9521	13.2248				-55.617	36.4275		27.1143
	10.6037	38.7423				17.5318	18.9448	119.32	1.68125		1.10088	137.747		-0.195208		20.5277	206.757	83.0873	70.6577		-64.0038	26.7491				-56.1891	-21.9988				10.1596	61.174				139.679	135.026				-0.649169	77.0482				-59.2207	57.7283		59.1951
	41.7466	51.9853				-71.8453	16.3886	170.427	211.854		44.8413	121.67		94.1324		140.692	88.3677	119.202	54.6316		-43.9344	58.7395				-27.9509	71.7543				-36.9221	95.1442				57.9653	164.452				-36.0028	96.3075				-35.8507	94.8093		12.4029
	32.8575	21.4489				116.132	49.5016	199.115	21.6546		1.07077	94.3101		42.2322		4.45681	165.694	125.122	48.0912		91.6567	72.8626				-54.5571	109.072				-87.1063	-3.62868				-23.685	-8.13634				-43.386	-20.6126				-16.7033	12.1497		26.2406
	-48.5299	36.6456				114.907	414.828	198.969	123.622		45.573	168.473		16.2733		-6.22612	21.2001	81.688	129.209		3.74179	42.2516				-59.7449	39.9715				-88.1829	102.672				38.0751					-49.5864	162.621				-20.9666			25.1216
	-44.9489					-50.0585		9.16604			12.0029					-72.0924		91.4086			-6.2208					45.8043					-94.1171					-89.6997					-4.15483					-5.66192
	33.6054					-54.6358		-2.06027			-9.71982					70.3505		145.552			22.4369					135.756					-86.4775					49.2392					-52.9776					-9.05378
	-44.7046					50.9615		171.135			28.4742					42.5738		137.565			120.136					32.8054					20.7586					85.007					-56.6874					78.3979
	19.3066					-11.5359		54.6935								83.2962		2.55691			17.9124					174.291					45.7286					-49.9928					-36.3011					50.9827
	19.4659					-25.9288										-58.4193					55.8539					-31.7627					91.8811					32.271					45.478					32.6705
	-68.7262					43.4268										-9.61459					18.5393					58.2517					6.98588					33.9263					-17.4556					73.8196
	17.6851					25.3252																				-83.041					108.534					82.7399					29.408					83.5749
	59.0973					-46.2425																				-29.9116					114.441					-42.1558					2.41875					71.2902
						27.9534																									130.745					-14.1577					39.333					-33.5692
						13.0282																									124.624					-42.9125										6.85886
Protein		Tryptase-E					MBL-2					OX40 Ligand					Clusterin					GAS 1					TNF-RII					Flt-3					ACE					bFGF					Progranulin
Time point	sham	48 hours	72 hours	96 hours		sham	48 hours	72 hours	96 hours		sham	48 hours	72 hours	96 hours		sham	48 hours	72 hours	96 hours		sham	48 hours	72 hours	96 hours		sham	48 hours	72 hours	96 hours		sham	48 hours	72 hours	96 hours		sham	48 hours	72 hours	96 hours		sham	48 hours	72 hours	96 hours		sham	48 hours	72 hours	96 hours
	9.68146	70.4544		39.9454		-36.5884	81.9596		71.0074		-41.2182	45.9406				-14.842	54.837				0.0696072	58.7877	47.6665	49.1031		-14.3041	41.1018	-30.2185			-45.6382	45.9354				-5.67635	123.406	55.7451			3.33795	46.26				9.47614	43.7216	-1.59975	19.0497
	-71.8666	36.4027		85.3063		-44.1194	43.6715		52.0035		-46.7599	0.470719				-27.8141	34.1526				7.45528	17.1528	53.3771	67.4821		41.7718	72.9704	69.4535			-7.21035	27.7635				-6.91683	27.7098	48.4536			14.8031	43.8723				-35.0277	-1.88609	-16.8848	9.53702
	-62.5554	83.5783		62.1786		-18.1285	53.6533		25.7529		25.6898	182.508				-25.453	33.6955				-25.5631	44.2645	52.1855	63.6484		-16.495	29.8	128.596			-22.3871	69.9286				-44.9071	75.9731	-33.9485			-33.5438	61.6503				-33.085	31.3122	17.1089	13.1438
	-38.86	29.6285		49.1334		-15.1157	38.1043		88.0462		-25.8002	85.0256				-22.3534	66.2369				-13.9807	18.8503	21.7792	59.5672		-85.7342	18.9631	14.8456			-39.6026	19.0787				-10.585	1.64192	57.6653			-39.0315	18.5732				-24.9631	47.6173	7.00865	22.7476
	-68.5518	64.1252		48.3597		35.097	-4.41972		11.0004		-73.3045	-18.09				-20.3964	15.4192				17.6568	32.0943	36.0905	34.279		-59.3699	33.2224	15.5533			69.6884	27.8986				48.2775	21.5523	-6.98289			-17.7771	2.92048				-34.6665	5.19602	66.8008	40.6904
	-49.2954	60.8332		48.0906		-0.130027	29.2564		42.5828		-38.9886	19.8605				-19.6711	32.9629				-12.4518	30.1133	50.1828	-1.13141		-50.5842	8.94402	83.749			22.5818	6.2729				-13.1215	20.316	-13.8974			-46.0826	31.2571				-48.0805	39.8614	25.4713	13.4002
	-43.5234	114.346		30.8147		-29.7944	79.5324		63.8337		-15.6275	83.3847				-23.58	30.8136				24.6245	44.268	55.0467	31.9483		-10.8602	37.8619	24.7282			-10.2295	54.7704				47.7533	5.61678	40.4518			18.2597	17.6532				-5.97319	15.6774	34.9207	24.6714
	-16.9535			-1.75496		-37.1084	156.111		15.9769		-26.3966	35.7475				-9.43691	41.4441				22.9081	57.4227	43.4853	63.091		-52.2477	54.3852	42.5339			59.0353					-18.6708	11.349	-0.11992			27.5858	44.8049				-10.2408	74.2205	53.603
	-52.3507					-33.7002					-26.2165					-9.26343					23.8112		30.3678			16.4155		15.4817			14.3348					62.4312		8.25918			19.3439					12.9452		16.8269
	-3.84983					-40.2118					-40.5366					-5.89118					59.1293		20.4493			-7.20909		41.7372			5.11447					-7.03083		35.2108			34.8061					-19.2053		25.8737
	14.3606					-13.4135					57.3897					-3.95966					-18.0089		53.2015			-4.95402		20.2272			-4.26938					-5.82089		73.2908			11.1106					-11.6345		0.543957
	52.0394					54.8048					25.883					11.5858					-7.02566					22.7111		18.0232			1.2245					-2.7087		57.7033			3.78149					18.5486		45.1696
	64.8825					-12.3218					-15.5734					17.8411					-22.0523					61.3329					-28.8922					-10.8097					5.86324					12.7069
	101.081					42.953					128.635					46.8734					-8.71959					7.60701					-7.56592					3.10918					2.48663					46.6084
	60.8762					21.8675					59.2489					17.7068					-37.2057					51.6566					-26.6087					-20.8312					-13.3723					42.8844
	55.7018					-1.63672					16.5418					10.8726					-35.2132					53.7991					-54.4713					-45.4217					-11.8786					36.8494
	49.2169					61.2861					37.1753					24.2101					10.078					46.4691					46.0116					39.5816					-7.16084					19.4776
						66.3992										53.5713					14.4934										28.882					-8.65238					27.4675					23.3087
Protein		Decorin					NOV					Galectin-1					Neprilysin					IL-2 Ra					IGFBP-2					IL-15					ANG-3					GITR					Fractalkine
Time point	sham	48 hours	72 hours	96 hours		sham	48 hours	72 hours	96 hours		sham	48 hours	72 hours	96 hours		sham	48 hours	72 hours	96 hours		sham	48 hours	72 hours	96 hours		sham	48 hours	72 hours	96 hours		sham	48 hours	72 hours	96 hours		sham	48 hours	72 hours	96 hours		sham	48 hours	72 hours	96 hours		sham	48 hours	72 hours	96 hours
	-27.8926	60.3198				1.82123	39.121				-19.7165	23.0341				-8.41521	-32.3305				-14.882	-11.6513	-32.8367			54.4839	-45.3573		-13.929		24.2672	-37.1533				38.8145	-7.11855	-24.265			-24.392	-59.044	-51.6157			27.9661	-22.3813	3.60583	-33.0085
	15.3361	28.657				-11.802	30.9022				0.123053	10.9482				-0.0890696	-31.3161				-15.3571	-21.5385	-14.5201			-39.9486	-27.6513		-26.2169		-5.9357	-46.1532				-40.4421	-50.2296	-2.39583			3.84452	-41.0677	-48.78			53.1028	-45.2858	12.1274	-30.7397
	-24.9274	35.8926				-13.5242	56.4003				-9.56047	33.8243				-16.1618	-10.0487				62.1876	-24.7083	-72.7347			-74.5415	-24.3245		-30.4826		-24.7208	-50.9553				-39.9293	-45.8264	-25.0609			88.707	-37.7626	-1.21178			56.0118	-50.0404	19.5022	-53.2785
	6.29595	3.21568				-36.3088	0.0928015				-20.6894	-1.65395				-14.2639	-28.5418				72.4975	-16.9919	-18.5416			-18.9667	-45.9034		-49.7293		-9.31184	-58.7179				21.3511	-56.1705	-10.7858			19.9685	-67.8809	-45.9879			34.2655	-37.9325	-2.56945	-42.8266
	20.3452	14.4243				27.7662	0.93745				26.8605	-3.82873				-17.381	-26.4495				61.4875	-17.2307	-9.91238			-8.68504	-12.4842		-26.4367		-52.9832	-0.164057				-21.7638	4.21808	-19.5262			64.6335	-13.6138	-77.3245			12.6908	-44.2939	-47.9539	-54.3758
	40.3663	21.11				-25.3839	37.4655				0.53517	7.01672				2.51323	-41.8849				1.83148	-21.4828	13.3884			46.0041	-12.9791		-31.6129		-38.5419	-10.1038				-20.6917	-31.2467	-35.6664			-2.33726	-13.6621	-11.0226			-10.0134	-45.449	-38.0286	-58.4459
	41.7599	1.63778				13.6742	-3.18759				20.3603	19.7265				16.5503	20.0446				-12.277	-29.5336	2.7182			11.4095	-15.2276		-33.381		7.97619	31.5934				-19.1248	-11.7874	-20.3127			-22.1224	-53.4163	-24.6758			-26.6869	-21.5845	-28.0486	-42.79
	-15.3642	75.5292				10.0721	15.0968				8.00981	28.8047				22.2923	2.12281				2.57337	-32.558	-16.6996			-26.0616			-24.185		7.17886	-62.2991				1.49412	-51.2087	-56.2993			-27.6065	-34.4453	-50.6442			-13.7845	-54.7711	-45.3182	-47.0476
	20.6998					3.58016					15.8076					51.1532					-50.9586		-54.2601			99.7445					28.5205					66.3556		-45.8452			-5.33189		-68.415			-10.3644		-34.1403
	-1.67498					8.66674					19.2795					-10.5112					-8.01716		-16.2479			66.0685					16.7573					9.29924		-18.2756			-34.6609		-42.4542			6.40957		-45.0729
	-35.2563					-17.5888					-11.7366					13.7951					-13.7117		-16.3063			-25.6707					23.323					-7.64578		8.64065			-13.2004		-34.6594			-15.1208		-18.3287
	-0.120207					24.4252					-7.77572					-9.68533					-9.53284		-18.3911			-12.3794					55.0172					2.9273					-14.79					-10.0529		-34.3007
	-30.966					-19.0524					-7.56					7.271					-23.2881					-29.5078					15.9936					7.63958					-1.06363					-21.7387
	-16.9231					6.72671					10.0319					-37.5455					4.30506					4.33575					4.10638					-12.4786					2.71213					-20.2683
	0.101916					-16.6478					-11.9584					19.3744					-17.6831					-35.3421					-16.6825					13.7584					-61.4533					-21.6888
	-33.7441					3.63563					-17.6936					-0.0444786					-23.4061					-21.3808					-16.7425										-1.45959					-20.5861
	26.6418					10.4622					2.57864					-18.8523					5.52626					-10.2755					-5.67517										-13.3248					-9.81803
	15.3216					29.4565					3.10433										-21.3192					20.7136					-12.5466										41.877					-10.3232
Protein		RANTES					TCA-3					Pro-MMP-9					CXCL16					Artemin					Endoglin					IL-1ra					MFG-E8					MMP-10					GITR L
Time point	sham	48 hours	72 hours	96 hours		sham	48 hours	72 hours	96 hours		sham	48 hours	72 hours	96 hours		sham	48 hours	72 hours	96 hours		sham	48 hours	72 hours	96 hours		sham	48 hours	72 hours	96 hours		sham	48 hours	72 hours	96 hours		sham	48 hours	72 hours	96 hours		sham	48 hours	72 hours	96 hours		sham	48 hours	72 hours	96 hours
	118.178	-48.7898	-35.0748	-13.615		38.5425	-36.7389	-46.7469			-9.66011	-28.0963				-5.50082	-24.8043	-16.4734	-64.9732		-0.935346	-34.5781				5.7867	-53.9942		-45.7969		69.2291	-78.3429		-56.6347		1.29759	-50.9006				30.3021	-83.1756				111.253	-13.098		-72.9597
	-2.59591	-34.4864	-70.8029	-91.9163		-27.0199	-41.3609	-41.8386			15.8334	-49.1754				66.0961	-61.7844	-21.0324	-24.9456		42.1975	-78.8499				37.4812	-51.0496		-46.4451		-12.6567	-32.5855		-28.8201		-25.2867	-66.9044				-44.4458	-92.7936				-35.7904	-66.6064		-84.9184
	-61.8339	-41.1811	-10.1475	-93.0597		14.4055	-68.42	-23.4367			145.314	-23.8147				-30.7225	-47.678	3.81515	-18.0239		15.658	-50.9328				37.1581	-30.1282		-47.1407		-13.0682	-89.8456		-2.41097		-66.1954	-55.0889				-39.9396	-47.5386				32.6029	-85.2101		-64.647
	28.1965		-36.591	-54.7531		-23.6961	-65.8308	-20.3407			5.03608	-71.3724				48.1743	-56.5788	-20.7651	-28.8223		-45.9633	-32.6871				37.798	-35.904		-36.0441		25.5753	-56.5994		-60.136		-55.229	-64.8926				38.3007	-44.9464				1.0217	-47.8291		-80.1666
	-49.0167		39.3281	-38.9027		-39.257	-20.1126	-49.9755			81.2524	-26.1779				86.9952	-21.4265	-60.024	-34.5468		-25.9174	-10.5206				41.5417	-62.3036		-56.9759		-66.4429	-62.4315		-5.69948		-45.626	-38.5355				-49.8807	-35.8171				8.29566	-42.2348
	2.21324		-89.3222			-52.448	-17.4847	-10.4644			97.4462	-20.1774				16.656	-47.9573	-35.088	-45.4887		-25.6557	-60.6672				-4.34104	-27.0185		-49.0961		-26.1696	24.969		-98.4357		16.9404	-23.272				-36.9625	35.2638				-62.0716	-46.6992
	-10.5742		-81.9407			9.39613	-20.0095	-44.3698			17.0072	-65.9357				-29.533	-16.9103	-23.8838	-27.7488		-51.3843					35.6274	-58.1845		-49.4229		103.071	-40.1772		-85.2188		22.8424	-37.8932				-1.91234	-73.4772				-39.164	-80.884
	19.1715		-95.3279			-16.1137	-66.5158	-48.4425			-13.3654	-50.8322				-41.2558	-64.5781	-53.5585	-24.2414		-36.1209					43.2663	-45.6103		-64.4553		-10.9444			-42.1242		36.2219					3.24067					-43.3778
	52.7731		-51.5145			35.3003		-13.9342			14.6994					-1.46504		-46.5583			40.6806					1.92981					22.6798					18.8049					-8.20257					-6.91303
	97.9933					1.29285		-16.4752			3.91757					-6.24909		-43.0117			-30.0354					59.9873					-54.9812					49.7731					34.0332					37.7682
	-11.7613					16.2407		-23.3887			-40.9129					11.7171		-18.9877			82.4641					-52.2119					-64.6896					15.7036					32.1781					-58.0427
	13.6767					35.8287		-58.702			-42.4202					2.06338		-44.619			55.1281					-24.5891					-33.1078					47.482					0.000373534					-28.7647
	-30.0813					19.6985					-65.3371					-20.1981					32.056					-46.9423					30.9763					8.27543					2.19099					-59.4302
	-26.0366					15.0902					-27.5717					-13.9016					2.57095					-40.0542					30.5199					-13.381					1.99995					99.7037
	-70.2497					-10.2085					-62.0504					-27.6522					11.7025					-32.4715										-29.9528					-22.6067					42.8487
	-8.09161					4.31048					-41.8075					-28.7434					-12.6323					-41.9952										-34.7052					-7.19314
	-51.7749					-3.73061					-38.6543					-18.2964					-33.8247					-19.7061										20.4398					69.4648
	-10.256					-17.6473					-38.7303					-8.19635					-20.6574					-38.2657										32.5949
Protein		RAGE					TECK					Fas L					Pentraxin 3					ADAMTS1					Galectin-3					TWEAK R					IL-1 R4					sFRP-3					MadCAM-1
Time point	sham	48 hours	72 hours	96 hours		sham	48 hours	72 hours	96 hours		sham	48 hours	72 hours	96 hours		sham	48 hours	72 hours	96 hours		sham	48 hours	72 hours	96 hours		sham	48 hours	72 hours	96 hours		sham	48 hours	72 hours	96 hours		sham	48 hours	72 hours	96 hours		sham	48 hours	72 hours	96 hours		sham	48 hours	72 hours	96 hours
	71.1791	-31.3834	-37.7528			136.446	-39.5622				-9.54724	-55.6345	-29.3697	-86.3452		-21.4427	-78.0532		-77.2724		-55.4848	-63.7887				-25.9477			83.4447		39.0364	-73.5034		-61.3859		-19.6597	-77.9088	3.06755	-48.2961		136.607	-77.57		-78.8389		-50.1862	-80.854		-94.8306
	145.898	-70.5966	-23.3779			-58.6453	-47.5825				27.9158	-66.6727	-25.3216	-49.3285		-68.1525	-70.7362		-13.6798		68.3531	-71.0488				-1.05728			95.7578		33.3474	-63.5063		-91.6257		-31.217	-85.2256	-20.4303	-28.2931		-1.02949	-80.2488		-70.6661		-17.1458	-91.2401		-71.7116
	8.20811	-56.1943	-69.8712			17.1794	-80.1962				84.8973	-73.4576	-45.3487	-64.2849		-53.2997	-62.6738		-53.788		-44.4661	-80.6206				12.1467			109.882		73.7685	-82.3694		-96.6719		45.8017	-73.3569	32.7208	-50.1914		-46.3942	-68.4087		-76.1766		-83.687	-86.2511		-44.3069
	100.34	-67.3923	-62.3737			-58.7046	-77.7263				56.6768	-91.3673	-45.3221	-52.5611		-86.7477	-60.3629		-71.2397		-62.5911					-19.7554			36.0863		7.93394	-95.548		-62.6865		-47.3876	-80.0938	30.7667	-56.5014		20.154	-91.0503		-71.6443		-76.8591			-82.6977
	-9.69379	-60.5771	0.69941			76.9836	-58.4357				110.841	-64.1366	-38.234	-39.1847		4.45037			-17.4178		92.5921					141.584			-26.2904		28.19	-78.7648		-91.7812		-21.9753	-84.584	-61.438	-50.9812		18.9578	-74.8779		-71.6639		-1.68708			-72.6554
	17.3428		-62.0393			7.45939					25.4799	-64.1056	-58.5772	-12.896		-3.52362			-74.5069		-39.5473					96.6063			15.9225		-13.1602	-64.4072		-88.5869		-25.1315	-54.9168	-48.2499	-40.9063		-24.7692	-76.3601		-71.1149		-23.3123			-98.0827
	14.1258		11.6862			70.8617					-16.2199	-42.0516	-60.1396	-64.058		123.123			-55.4355		-75.6425					73.0779			28.4495		-7.62739	-53.0799		-64.4117		34.8471	-47.2536	-53.481	-58.574		70.3851	-64.3076		-66.9988		84.3753			-59.2262
	-14.2267		-64.9542			70.0798					-16.3138	-80.7921	-42.2714	2.59585		53.6834			-58.0106		-1.47905					35.7985			60.701		-8.99433			-81.4077		10.0675	-87.437	-47.7355	-44.5612		74.3764	-68.5143				15.7625
	41.9743		-52.9542			24.2983					-28.5402		-37.7134			5.03481					-59.0445					60.842					4.89174					51.8505		-57.1303			87.7047					16.7949
	-68.1254		-50.9163			-35.8947					-34.7817		-45.4725			24.0823					60.2551					13.6722					24.4472					32.3048		-34.0107			114.041					-6.17072
	-72.5405					-26.1224					-9.91725		-78.6175			-6.09606					-50.8359					-63.386					-4.85597					-3.51769		-37.8497			-73.0816					-83.5845
	-56.436					-57.9961					4.82357					-3.00303					49.7061					-50.7476					-19.943					25.4261		-47.3877			-67.3845					161.752
	-57.1911					-76.0512					-78.9836					9.74172					-2.17748					-60.6855					-39.5113					-21.3494					-61.5858					17.3274
	-41.6825					-44.6667					47.2909					48.88					120.359					-12.073					-36.6886					-7.58853					-53.2598					66.7692
	-79.1711					-33.1672					-67.0982					-41.2566										-40.8228					-14.7667					-17.2796					-63.7986					33.6647
						-11.6702					-31.6576					-12.5648										-68.7638					-34.0518					15.0652					-50.3459					-6.12496
											-64.6655					29.7821										-49.8735					-1.60733					-19.7381					-37.9755					-89.6602
											-0.200875					-2.69152										-40.6163					-30.408					-0.51871					-42.6104					41.9721
Protein		VEGF-B					BTC					IL-2 Ra					IFNg					Galectin-7					IL-1b					IL-6					Eotaxin-2					P-Cadherin					TGFb1
Time point	sham	48 hours	72 hours	96 hours		sham	48 hours	72 hours	96 hours		sham	48 hours	72 hours	96 hours		sham	48 hours	72 hours	96 hours		sham	48 hours	72 hours	96 hours		sham	48 hours	72 hours	96 hours		sham	48 hours	72 hours	96 hours		sham	48 hours	72 hours	96 hours		sham	48 hours	72 hours	96 hours		sham	48 hours	72 hours	96 hours
	-19.0912		3.08652	339.864		-20.8546		-21.2124			-14.882		-11.6513			18.9678		-48.1216			11.6641		-41.837			46.6947		-40.7574			50.3981		-19.2281			102.489		14.9306	-31.1982		-87.4093		-84.5451			13.389		-92.241
	3.60288		136.099	250.682		-37.6074		-44.0582			-15.3571		-21.5385			-36.2662		-21.5201			88.0815		-1.36908			-63.3332		-49.9652			-75.3733		22.1537			10.0386		-11.9781	-73.0754		-35.8035		-77.7389			17.4299		-74.1347
	-5.85538		9.20492	71.6886		-73.4146		17.7041			62.1876		-24.7083			-36.1079		-49.5728			-15.3696		-14.0997			-60.6727		-2.21567			-37.5302		-53.1178			15.3958		-17.7341	-74.0448		-86.2411		-71.218			-83.3918		-9.73772
	28.1325		82.8868	76.3941		-48.9281		27.9011			72.4975		-16.9919			5.59476		-48.9322			-27.2437		4.15422			-69.7728		-21.756			-0.0127191		-36.431			-27.5871		-64.0766	-79.4654		72.0707		-78.4298			34.2115		-61.8491
	-1.83316		117.27	59.1237		-40.8128		80.0322			61.4875		-17.2307			29.2356		-42.1382			68.8126		-23.9576			-7.99222		-39.6796			11.9497		-68.3241			147.451		-62.3294	-47.5067		-8.72725		-59.3021			0.85018		-43.8818
	-4.95214		78.8406	199.537		3.54599		38.8416			1.83148		-21.4828			27.4825		-39.5767			3.99843		-32.2947			33.1221		-40.4416			73.6757		-33.1336			74.4272		-66.8504	-29.209		105.816		-39.8734			84.4315		-91.5914
			27.0812	71.1931		-4.38168		81.5427			-12.277		-29.5336			6.97991		7.69027			-7.29044		-60.0064			-35.9723		-25.426			18.5426		-63.9934			11.9835		-65.4329			6.9845		-27.7927			28.0016		-79.0809
			245.624	205.089		29.4626		49.824			2.57337		-32.558			-4.09416		39.0745			-20.2505		-69.1908			-7.90561		-34.292			7.8008		18.0839			32.9655		-71.0152			86.5768					-20.7039
			33.2308			0.00779112		28.0641			-50.9586					-22.8221		-21.1054			-30.9739		-38.3816			-14.4862		-15.0414			16.3154		-30.4848			13.3698		-72.5653			-84.9764					-74.217
						35.0599		40.4738			-8.01716					-2.02777					35.6038		-13.828			9.00219		-21.1148			-13.5207		-49.8723			-8.98293					-50.5194
						6.23759		56.8542			-13.7117					-4.90318					25.8853		-28.1093			41.6757		-7.64493			33.8608					-59.4276					82.1676
						9.80288		22.3471			-9.53284					17.9616					-47.7646		5.54963			45.2635					-39.3882					3.06848
						52.8757					-23.2881										-20.2464					46.063					-3.87097					-70.6037
						5.7234					4.30506										-39.307					12.3747					-33.9774					-22.2481
						28.2228					-17.6831										9.59256					25.9183					-8.86897					-74.5028
						38.0499					-23.4061										-35.2099															-80.4402
						16.975					5.52626										0.0172387															-9.75435
											-21.3192																									-57.6308
Protein		Granzyme B					TRANCE					G-CSF					IL-20					CD27					I-TAC					TRAIL					Dtk					Marapsin					MCSF
Time point	sham	48 hours	72 hours	96 hours		sham	48 hours	72 hours	96 hours		sham	48 hours	72 hours	96 hours		sham	48 hours	72 hours	96 hours		sham	48 hours	72 hours	96 hours		sham	48 hours	72 hours	96 hours		sham	48 hours	72 hours	96 hours		sham	48 hours	72 hours	96 hours		sham	48 hours	72 hours	96 hours		sham	48 hours	72 hours	96 hours
	0.256022		-90.992			4.58089		-94.6617	-88.8573		-12.9292		-78.8938			-39.8043			180.567		-0.0816772			78.1167		103.291			54.0538		-3.9319			71.4534		-13.9669			-24.3577		-4.77932			40.1744		-4.15702			-19.8456
	41.141		-90.2393			151.728		-85.12	-68.2512		-19.9381		-83.1262			-69.1588			210.106		16.3729			164.757		-84.8809			82.719		-21.8038			-40.4121		4.90314			52.8608		-14.2005			12.54		14.255			-17.7707
	44.4544		-83.4583			-81.7148		-70.815	-69.2871		-3.36887		-93.7933			-17.1227			125.658		56.7781			152.818		-36.3132			31.9651		-66.028			6.88284		-30.7949			37.1439		67.125			18.5514		-8.75256			-31.0951
	-36.8835		-77.1292			19.058		-93.1527			-90.884		-95.5953			-58.2411			130.055		-18.1901			184.254		26.275			10.7702		-11.1454			24.5803		-32.5887			51.408		-0.0716195			22.6412		-2.0449			-25.1945
	14.7585					-91.5746					-21.1187					-39.0347			125.342		-20.4484			108.433		-49.5245			61.4649		-58.3298			46.5321		-32.6529			27.9247		-21.632			25.3709		25.4326			-33.4437
	-38.8377					-80.2412					-8.98593					73.2338			114.429		31.2212			205.789		91.8257			93.0981		-23.1469			41.2811		-14.2641			9.90132		-17.7293			27.8542		-3.01145			-42.1718
	2.71817					150.1					-91.8409					-29.5153			231.006		36.5522			158.793		-51.1289			95.0342		-23.7221			59.8547		-13.5488			50.0828		-54.0213			7.15759		9.51133			8.45794
	-23.7573					-98.7742					-53.2012					-71.6791					3.58066					-91.2745			128.486		-12.6996			80.316		22.1447			60.5414		-33.673					5.31248			11.3676
	-50.8518					25.0322					-16.2413					47.3593					-62.3596					-0.240159					48.2542					17.0502					-24.6961					11.8492
	42.5567					91.3629					114.677					-55.7335					-1.06492					19.8454					49.5274					48.2393					-17.7081					0.731866
	4.25664					-89.553					145.858					107.353					-15.6236					25.5395					0.87889					34.3026					-28.4428					-21.5612
											-31.8487					80.5843					-26.7372					21.1511					-12.0056					19.8152					62.1171					-14.2635
											-26.2235					63.2828										15.385					52.2281					3.96055					-27.4482					-9.14926
											101.123					19.5449										35.2342					30.6389					-15.8411					6.24398					-2.62625
											14.9225					-15.4509										23.9977					63.9165					0.914512					19.1733					-27.3808
																-32.3511										-27.0017					-19.9738					-25.723					56.6826					15.3805
																-2.41514										-18.8611					-2.92738					28.0498					-10.492					10.3474
																39.1595										-3.31298					10.129										43.5304
Protein		MIG					JAM-A					HGF					MIP-1g					Periostin					CD30L					MIP-1a					IL-9					TACI					EGF
Time point	sham	48 hours	72 hours	96 hours		sham	48 hours	72 hours	96 hours		sham	48 hours	72 hours	96 hours		sham	48 hours	72 hours	96 hours		sham	48 hours	72 hours	96 hours		sham	48 hours	72 hours	96 hours		sham	48 hours	72 hours	96 hours		sham	48 hours	72 hours	96 hours		sham	48 hours	72 hours	96 hours		sham	48 hours	72 hours	96 hours
	-6.66978			-40.3539		-7.75762			-23.2975		-3.34755			1.95335		-9.18531			-43.5697		12.5956			-25.0374		-24.9603			-35.4071		-81.0042			-58.5801		-24.2235			-60.651		-17.1566			-43.1494		-90.9097			-74.4829
	-16.5885			-41.0062		7.26204			-22.0542		42.0072			-20.7884		0.405978			-36.4666		37.352			-50.2349		-5.04747			-41.0737		-78.4096			-59.7626		-53.6653			-30.6141		-37.209			-31.8153		200.283			-83.6165
	-19.9915			-8.68548		-7.95302			-25.8734		20.2696			-24.5153		-9.66287			-38.4138		-5.04227			-46.9658		-76.7835			-13.6805		-90.508			-64.2397		26.6455			-71.4333		-40.2819			-56.259		138.899			-34.4302
	27.1419			-55.1769		-6.01395			-28.6015		-19.6441			-27.655		6.3127			-19.8795		-2.01244			-66.8224		6.92353			-49.4949		92.6257			-30.4366		-49.7508			-59.0341		90.5551			-63.4843		76.7509			-72.0535
	5.32957			-22.4706		-19.6018			-34.9412		-2.50396			-47.7462		29.7771			-23.7713		17.3641			-48.6612		86.3378			-60.0383		61.3043			-35.5377		-11.3201			-46.0059		37.4729			-71.9753		59.9538			-96.2785
	44.9623			-17.332		-14.241			-28.4122		-26.6509			-46.736		-14.7988			-55.5482		18.3453			-33.8656		126.813			-49.1284		207.954			-48.5939		8.41074			-20.5628		15.1197					248.627			-96.8377
	-11.2378			-40.9786		34.5238			-26.8509		-20.9702			-33.6186		-3.57515			-40.0025		-15.4064			-32.7342		-44.3226			-66.3051		-74.3356			-35.6862		71.2121			-52.1018		-27.2578					-75.2546			-43.2306
	-1.9136			20.125		29.6274			-32.3206		-4.32452			-56.2327		19.0621			-56.7212		-16.6133					-10.9771			-49.2646		-43.5059					48.8201			-42.8208		31.249					-95.987			-86.2936
	-24.3055					18.9295					-18.9987					-47.6027					23.8262					-71.5933					-88.938					22.9037					-16.7123					-70.225			-83.2436
	-28.113					43.4122					-1.77912					53.9991					13.1378					-30.2948					-57.0466					28.26					-2.62014					-94.3878			-73.2151
	11.9246					1.48527					24.2935					10.6577					-30.036					-8.9552					-39.6655					7.53378					-10.6127					-19.073			-23.4609
	20.9751					1.23127					-20.2101					-27.4079					38.1156					8.18644					-48.7277					-27.0823					-68.2574					-2.51567
	-1.62824					-18.9515					-3.34862					-56.5916					-23.5729					39.7216					87.7065					38.0647					45.7128					-40.7426
	49.7706					-0.266902					-25.0472					44.9531					-0.966235					62.3291					176.21					0.464466										120.785
	-22.9676					-24.0126					-7.02503					-51.7298					0.309767					-36.3132					-8.11809					-64.0817										-97.015
	-10.8596					-18.5594					12.1579					-28.2375					-55.3636					-7.0653					3.79294					-37.7149										-97.0033
	-13.726					-2.56462					55.1182					28.9289					-4.63258					6.51167					10.9843					-42.9932										-94.1177
	-2.10281					-16.5486										54.7037					-7.28105					-20.5114					-30.3209					58.517										-68.0699
Protein		ALK-1					IL-17B
Time point	sham	48 hours	72 hours	96 hours		sham	48 hours	72 hours	96 hours
	-4.53458			-78.2901		171.722			-62.3667
	-25.2746			-85.4531		-26.4414			-88.8986
	11.2763			-92.8149		44.4859			-87.3897
	84.6293			-64.5585		-82.1196			-97.3385
	-38.0468			-86.3058		89.255
	11.5884			-89.0008		-49.2072
	-39.6658					-74.9231
						-91.6908
						77.6197
						-58.6847
