# Supplementary material for: Time-dependent cytokine and chemokine changes in mouse cerebral cortex following a mild traumatic brain injury
Source: eLife. 2020 Aug 17;9:e55827. doi: 10.7554/eLife.55827 (PMC7473773; doi:10.7554/eLife.55827)
Supplement: Figure 3—source data 1. [file elife-55827-fig3-data1.xlsx]

## Sheet: Figure 3 7, 14 & 30 days
Source data for Figure 3	% increase from sham values
Protein		VEGF-B					SLAM					E-Cadherin					IL-20					CD40L					Galectin-3					CD36					I-TAC					Gas 1					Prolactin
Time point	sham	7 days	14 days	30 days		sham	7 days	14 days	30 days		sham	7 days	14 days	30 days		sham	7 days	14 days	30 days		sham	7 days	14 days	30 days		sham	7 days	14 days	30 days		sham	7 days	14 days	30 days		sham	7 days	14 days	30 days		sham	7 days	14 days	30 days		sham	7 days	14 days	30 days
	-19.0912	163.024	79.298	32.8525		-18.886	-32.0666				-75.2004	191.239	53.3119			-39.8043	180.567	-66.4561			-71.9382	-7.57713	-37.554	75.8616		-25.9477	42.861				-16.2928	-76.4853				103.291	63.3835				0.0696072	8.67373				-36.3094	-26.5065
	3.60288	-12.4971	-9.53513	39.0437		54.5495	79.0578				-21.5687	91.607	1.30093			-69.1588	210.106	166.233			-73.6462	-18.8724	-16.5573	120.56		-1.05728	184.591				2.58747	20.0603				-84.8809	7.13378				7.45528	4.04676				89.0906	4.89655
	-5.85538	378.428	32.3176	54.3186		-37.4216	310.159				-10.2671	120.393	94.948			-17.1227	125.658	142.342			-26.7646	87.3348	-43.7111	199.586		12.1467	95.4905				-55.1983	-24.7096				-36.3132	-11.9795				-25.5631	1.54875				99.9123	5.87269
	28.1325	228.861	43.529			24.6402	255.552				-16.0403	-72.4172	30.152			-58.2411	130.055	19.6076			-83.9458	11.3807	90.6916	255.833		-19.7554	195.463				-28.5479	2.72475				26.275	-15.9848				-13.9807	43.297				39.3992	93.719
	-1.83316	143.789	102.755			-48.1226	360.946				1.10088	175.306	55.6413			-39.0347	125.342	157.715			139.679	117.776	-60.4415			141.584	108.265				-18.0712	93.5036				-49.5245	95.0365				17.6568	113.975				1.3023	31.3611
	-4.95214	391.103	62.6799			21.3601	143.717				44.8413	78.4694	57.3583			73.2338	114.429	234.726			57.9653	123.412	126.185			96.6063	69.6363				-18.812	26.3678				91.8257	51.1394				-12.4518	26.7998				22.3753	27.3778
		318.772	97.8674			-1.68913					1.07077	91.0912	102.048			-29.5153	231.006	130.135			-23.685	79.6171	119.651			73.0779	22.6166				-18.6097	132.238				-51.1289	-2.48912				24.6245	28.3199				-59.7043	103.49
			184.135			-3.94367					45.573	213.93	34.6478			-71.6791		101.509			38.0751	259.261	182.512			35.7985	328.112				76.5125	131.272				-91.2745	153.189				22.9081	-12.4266				-53.326	65.7215
			86.4243			-3.87248					12.0029		54.5664			47.3593					-89.6997	275.84	31.2712			60.842	7.78515				59.8727	136.137				-0.240159	60.9382				23.8112	44.393				-44.4043	-9.28719
			226.132			-51.0171					-9.71982					-55.7335					49.2392		148.622			13.6722	-36.3013				60.8844	61.5193				19.8454	114.385				59.1293	49.4087				-5.3075	62.6593
						64.4119					28.4742					107.353					85.007		184.643			-63.386	-0.818288				-49.46	147.354				25.5395	30.183				-18.0089	91.25				-24.3263	33.1087
																80.5843					-49.9928		45.9971			-50.7476	20.4353				67.8128	242.669				21.1511					-7.02566	75.5283				-22.1886
																63.2828					32.271					-60.6855					-28.9765					15.385					-22.0523					-21.3436
																19.5449					33.9263					-12.073					34.7082					35.2342					-8.71959					10.6361
																-15.4509					82.7399					-40.8228					-41.7291					23.9977					-37.2057					-12.2501
																-32.3511					-42.1558					-68.7638					-45.3593					-27.0017					-35.2132					-25.7862
																-2.41514					-14.1577					-49.8735					-30.8388					-18.8611					10.078					3.24052
																39.1595					-42.9125					-40.6163					49.7144					-3.31298					14.4934					38.9916
Protein		PDGF-AA					MBL-2					Lungkine					Galectin-1					Progranulin					MCSF					Fractalkine					BLC					CXCL16					DLL4
Time point	sham	7 days	14 days	30 days		sham	7 days	14 days	30 days		sham	7 days	14 days	30 days		sham	7 days	14 days	30 days		sham	7 days	14 days	30 days		sham	7 days	14 days	30 days		sham	7 days	14 days	30 days		sham	7 days	14 days	30 days		sham	7 days	14 days	30 days		sham	7 days	14 days	30 days
	108.645	-0.868434				-36.5884	-1.79071	17.5247			16.4108	49.6233				-19.7165	9.0766	30.9803			9.47614	35.452				-4.15702	-4.34534				27.9661	2.918	-2.44267			5.25873	-20.971				-5.50082	-20.6104	-18.0849			-0.805649	-18.6074		-32.8456
	-49.0088	-6.73281				-44.1194	99.7701	60.2952			2.12071	12.1147				0.123053	48.8754	18.0366			-35.0277	34.839				14.255	-15.6141				53.1028	-14.6277	-10.3099			-20.2132	-20.3227				66.0961	-40.5452	-48.2672			-54.5147	-25.881		-30.6879
	-11.7105	2.03626				-18.1285	-20.0524	-12.5492			16.4708	38.4673				-9.56047	47.0845	18.34			-33.085	24.2781				-8.75256	-2.78608				56.0118	-15.7114	-15.3912			-14.2211	-40.0411				-30.7225	-38.2381	-44.0161			-49.8388	-37.8527		-42.5958
	-34.1709	26.9783				-15.1157	3.91339	-7.12652			-15.7155	57.5731				-20.6894	59.4255	9.79993			-24.9631	25.0288				-2.0449	-6.78281				34.2655	0.995726	-49.4366			11.3418	-41.8837				48.1743	-32.2302	-35.5385			-36.4542	-25.7468		-57.4264
	-58.1093	58.7907				35.097	69.1836	4.67972			-12.8646	24.7886				26.8605	23.5336	12.9607			-34.6665	17.0053				25.4326	-5.50301				12.6908	-40.4656	-13.9844			-1.96695	-25.3848				86.9952	-24.1185	-30.892			-23.5229	-24.7179
	-40.3178	22.6923				-0.130027	-16.9678	32.5669			-12.8761	1.05499				0.53517	4.98882	8.3433			-48.0805	21.8287				-3.01145	-21.3156				-10.0134	-52.0825	-39.5828			32.6787	-22.1759				16.656	-55.4077	-5.30623			-9.95013	-15.394
	0.890733	102.706				-29.7944	36.4331	49.0816			37.7897	26.4136				20.3603	5.01708	20.0963			-5.97319	25.1825				9.51133	-37.0727				-26.6869	-42.705	-22.414			-14.7223	-41.361				-29.533	-48.1753	-18.4513			20.7555	-21.9294
	10.8525	4.13527				-37.1084	50.6199	33.7158			-11.3079	-5.53478				8.00981	-7.03619	24.5565			-10.2408	19.254				5.31248	-53.6145				-13.7845	-72.5352	-19.6651			-5.3035	-44.2647				-41.2558	-66.3263	-10.1565			51.4249	-53.9648
	35.9254	20.9904				-33.7002	0.367832	32.4026			0.189847					15.8076	25.4652	15.4952			12.9452	-9.71026				11.8492	-23.2589				-10.3644	-41.1842	-26.6789			-13.1916	-4.20149				-1.46504	-2.69509	-14.1775			42.1473	-32.1791
	-1.57661	28.8543				-40.2118	52.6003	21.4344			-7.93822					19.2795	1.76565	1.71311			-19.2053	16.3982				0.731866	-36.1386				6.40957	-34.1148	-22.4791			-18.4553	-31.7556				-6.24909	-14.5153	-13.7314			37.2017	-27.9734
	14.6423	66.2905				-13.4135	64.4072	26.1461			-12.2875					-11.7366	14.7571	0.110808			-11.6345	4.35414				-21.5612					-15.1208	-25.6182	-14.6657			-4.44135	-16.0882				11.7171	-13.9261	-24.2032			21.4345	-42.2304
	-16.7872	58.3895				54.8048	36.6665	38.1802								-7.77572	45.006	18.6137			18.5486					-14.2635					-10.0529	6.12855				36.0109	-23.863				2.06338	16.4771	-19.1981			2.11949
	-13.6137					-12.3218										-7.56					12.7069					-9.14926					-21.7387					8.13325					-20.1981
	-5.15809					42.953										10.0319					46.6084					-2.62625					-20.2683					30.8369					-13.9016
	-8.46525					21.8675										-11.9584					42.8844					-27.3808					-21.6888					-10.9656					-27.6522
	-31.6586					-1.63672										-17.6936					36.8494					15.3805					-20.5861					-2.99366					-28.7434
	66.9267					61.2861										2.57864					19.4776					10.3474					-9.81803					-11.8102					-18.2964
	33.3227					66.3992										3.10433					23.3087										-10.3232					-5.97199					-8.19635
Protein		IL-15					MIG					TCA-3					Testican 3					IL-1a					IL-6					Leptin					CD30L					IL-7 Ra					E-selectin
Time point	sham	7 days	14 days	30 days		sham	7 days	14 days	30 days		sham	7 days	14 days	30 days		sham	7 days	14 days	30 days		sham	7 days	14 days	30 days		sham	7 days	14 days	30 days		sham	7 days	14 days	30 days		sham	7 days	14 days	30 days		sham	7 days	14 days	30 days		sham	7 days	14 days	30 days
	24.2672	-8.49125				-6.66978	-23.78	-46.8912	-18.2955		38.5425	-19.3963				13.8602	-23.7341				-33.3642	-46.4719		-49.182		50.3981	-31.8831		-55.9397		78.3494	-4.72643				-24.9603	-2.38826	-29.4138			-42.3839	-49.3215				86.2695	-25.6453
	-5.9357	-52.5603				-16.5885	-48.6265	-2.95813	-49.8442		-27.0199	-60.5405				30.5563	-73.0098				-26.5549	-25.4078		-44.8394		-75.3733	-69.5429		-12.9817		7.64677	-25.0017				-5.04747	-27.5796	-4.78059			-53.0871	-74.4129				-53.7566	-52.7764
	-24.7208	-54.4554				-19.9915	-64.4881	-74.3725	-2.31824		14.4055	-56.0598				-77.282	-68.3381				-2.84821	-36.3334		-59.7846		-37.5302	-78.3691		-38.5936		-13.8031	-76.0319				-76.7835	-62.0387	-40.7819			20.6833	-30.4422				142.764	-52.2219
	-9.31184	-50.3174				27.1419	-68.4352	-66.3781	-53.6561		-23.6961	-57.4992				-39.6285	-50.9802				-51.7078	-32.5494		-41.4042		-0.0127191	-39.5706		-61.2968		-60.3382	-63.3232				6.92353	-62.9018	-53.3354			80.8903	-35.4837				13.1594	-42.2165
	-52.9832	-10.3483				5.32957	-11.8199	-1.2528			-39.257	-12.3418				-68.5797	10.6632				31.3339	-61.3275				11.9497	-18.1575				-65.3497	-33.6013				86.3378	-41.3398	-46.2065			-29.1998	-42.1696				-26.8825	-24.4481
	-38.5419	-32.9317				44.9623	-36.2455	-22.3663			-52.448	-21.0309				-40.0692	-42.6156				9.69931	-8.56271				73.6757	-48.0961				12.4185	-90.4563				126.813	-94.4455	-52.3417			-29.3604	-58.3207				-62.2145	-42.9538
	7.97619	-43.1949				-11.2378	-54.6455	33.8644			9.39613	-27.4227				-19.6267	-66.8627				-26.7872	-59.2864				18.5426	-73.6495				-20.103	-7.53397				-44.3226	-64.4834	-10.6272			-83.9716	-55.6444				-80.1949	-45.0533
	7.17886	-77.7335				-1.9136	-26.9064	-18.4424			-16.1137	-63.3352				0.95846	-92.4543				-40.4039	-9.06617				7.8008	0.0907531				44.2371	-49.7146				-10.9771	-22.9514	-54.3544			-56.4225	-17.1609				2.33784	-51.1967
	28.5205	-3.44236				-24.3055	-20.3402	-62.293			35.3003	-5.98508				46.505	-10.3835				6.50815	-17.7328				16.3154	-43.0791				39.3248					-71.5933	-17.212	-83.1245			-39.5464	-35.9956				-5.46917
	16.7573	-0.574698				-28.113	-11.0474	18.0293			1.29285	-7.67897				41.1768	-33.5929				-10.4828	-35.3074				-13.5207	-14.9795				-17.864					-30.2948	-64.2417	-30.4192			-66.3994	-56.6544				-65.5993
	23.323	-20.4907				11.9246	-29.1151	-43.602			16.2407	-44.5496				20.004	14.8816				-2.65523	-63.8155				33.8608	-43.8693				41.7365					-8.9552	-16.1493	-84.5623			67.2538					77.638
	55.0172	-26.6105				20.9751	-1.65786	-1.50359			35.8287	-29.3177				14.4234	27.6131				14.262	-34.5748				-39.3882					-9.8128					8.18644	-60.1548	34.1718			88.6133					-34.5861
	15.9936					-1.62824					19.6985					14.7277					-5.596					-3.87097					27.6832					39.7216					-3.94612					6.53792
	4.10638					49.7706					15.0902					30.714					98.9364					-33.9774					-79.4312					62.3291					13.6717
	-16.6825					-22.9676					-10.2085					-25.9333					-24.2457					-8.86897					13.9305					-36.3132					56.7436
	-16.7425					-10.8596					4.31048					-11.4483					48.5181										-39.8622					-7.0653					3.91013
	-5.67517					-13.726					-3.73061					37.7199					-34.1856										41.2324					6.51167					39.1939
	-12.5466					-2.10281					-17.6473					31.9336					49.53															-20.5114					33.3566
Protein		RANTES					GITR					MadCAM-1					MIP-1a					Fas L					MCP-5					IL-7					IL-1ra					BAFF R					CD6
Time point	sham	7 days	14 days	30 days		sham	7 days	14 days	30 days		sham	7 days	14 days	30 days		sham	7 days	14 days	30 days		sham	7 days	14 days	30 days		sham	7 days	14 days	30 days		sham	7 days	14 days	30 days		sham	7 days	14 days	30 days		sham	7 days	14 days	30 days		sham	7 days	14 days	30 days
	118.178	-58.2363				-24.392	-61.3051				-50.1862	-31.8448	-35.4203			-81.0042	-9.34429				-9.54724	-26.5942	-31.8193			54.9577	-82.3814	-98.0624			-37.6332	-95.6715				69.2291	-95.4514	-97.8494	-39.2462		-61.9552		10.7347			-90.6136		2.21155
	-2.59591	-62.3085				3.84452	-33.44				-17.1458	-60.5912	-19.6372			-78.4096	-81.2638				27.9158	-24.5803	-32.7192			-72.948	-77.3605	-72.6086			-48.6899	-89.9323				-12.6567	-78.6867	-89.6589	-46.0588		-37.5528		26.8084			-86.1672		108.884
	-61.8339	-69.2922				88.707	-60.3782				-83.687	-25.8565	-39.1492			-90.508	-85.782				84.8973	-45.87	-58.5016			1.02814	-61.782	-6.86988			-91.2122	-89.6003				-13.0682	-79.6969	-94.7146	-45.5803		-61.6427		-37.2254			-34.3023		172.948
	28.1965	-78.3675				19.9685	-54.7368				-76.8591	-66.8606	-34.7552			92.6257	-84.5971				56.6768	-51.3	-16.9449			72.3088	-69.0063	-6.29685			-43.7086	-61.6992				25.5753	-83.5735	-16.3355			-55.617		-13.4361			-40.0202		26.1708
	-49.0167	-33.4376				64.6335	-39.3837				-1.68708	-63.3017	-59.0188			61.3043	-40.2532				110.841	-73.7625	-58.4365			34.2415	-54.842	-20.076			-31.3942	-90.2787				-66.4429	-99.0784	-60.995			-59.2207		126.361			-58.3737		1.85981
	2.21324	-13.7152				-2.33726	-59.3692				-23.3123	-51.9953	-67.9003			207.954	-57.128				25.4799	-29.6358	-61.9418			1.36407		-49.1419			-45.927	-89.229				-26.1696	-60.6138	-87.3882			-35.8507		179.9			-62.388		186.614
	-10.5742	-22.7635				-22.1224	-65.3989				84.3753	-38.5661	-52.0344			-74.3356	-91.5653				-16.2199	-77.4513	-55.5627			-24.1194		-73.7166			78.1706	-60.2237				103.071	-23.5642	29.2279			-16.7033		146.296			43.2222		81.4428
	19.1715	-24.6185				-27.6065	-26.678				15.7625	-86.7096	-94.0551			-43.5059	-15.5143				-16.3138	-38.9949	-15.6347			-39.6343		-82.0769			4.32216	-15.4269				-10.9444		-85.0568			-20.9666		157.541			46.3832		140.913
	52.7731	-69.5286				-5.33189	-41.5128				16.7949	-74.6852				-88.938	-2.33222				-28.5402	-56.2924	-68.3912			-31.5188		22.9255			97.0194	-55.7033				22.6798		-27.3932			-5.66192		207.861			-12.4937
	97.9933					-34.6609	-41.2556				-6.17072	-2.66282				-57.0466	-37.4452				-34.7817	-49.4863	-22.1512			70.2116					47.5409					-54.9812		-80.7034			-9.05378		128.995			53.0899
	-11.7613					-13.2004	-77.8334				-83.5845					-39.6655	-43.1195				-9.91725	-69.9268	-75.9447			23.9276					138.502					-64.6896					78.3979		136.585			78.3159
	13.6767					-14.79	-23.6227				161.752					-48.7277	-50.9422				4.82357	-58.0689	-21.6921			30.1622					112.568					-33.1078					50.9827		113.675			102.157
	-30.0813					-1.06363					17.3274					87.7065					-78.9836					-33.1341					-61.4428					30.9763					32.6705					61.2217
	-26.0366					2.71213					66.7692					176.21					47.2909					-54.7044					-14.4707					30.5199					73.8196
	-70.2497					-61.4533					33.6647					-8.11809					-67.0982					21.8459					-80.252										83.5749
	-8.09161					-1.45959					-6.12496					3.79294					-31.6576					37.3093					-40.536										71.2902
	-51.7749					-13.3248					-89.6602					10.9843					-64.6655					-91.2989					17.1451										-33.5692
	-10.256					41.877					41.9721					-30.3209					-0.200875																				6.85886
Protein		IL-17E					CD48					IL-33					Meteorin					Renin 1					CD27					BTC					OX40 Ligand					OPN					C5a
Time point	sham	7 days	14 days	30 days		sham	7 days	14 days	30 days		sham	7 days	14 days	30 days		sham	7 days	14 days	30 days		sham	7 days	14 days	30 days		sham	7 days	14 days	30 days		sham	7 days	14 days	30 days		sham	7 days	14 days	30 days		sham	7 days	14 days	30 days		sham	7 days	14 days	30 days
	-91.4733		34.9021	65.2728		-60.5314		28.7978			-35.6132		131.947			4.00146		75.109			-17.4369		-47.8676			-0.0816772		58.9493			-20.8546		-5.53065			-41.1778		57.5888			52.0909		76.9583			-44.2624		-15.1151
	-23.4255		-67.3401	-11.0564		-47.7455		69.441			-35.2896		33.9168			26.7717		79.7769			56.062		-46.8585			16.3729		-13.4509			-37.6074		12.2546			-46.7232		94.9639			36.1461		-2.13389			-13.2631		40.2205
	-62.6924		-16.8975	239.263		-54.7717		-51.1404			-12.0434		128.333			28.1573		120.631			-56.8893		6.53961			56.7781		-30.6135			-73.4146		-8.94348			25.7763		-82.4787			-59.5791		66.956			-21.2693		-45.8506
	-37.953		21.1948	159.012		-52.9668		26.1181			-16.1424		-18.1187			-54.8055		71.6501			-85.1402		15.6928			-18.1901		-56.8414			-48.9281		19.2839			-25.7491		76.3135			-56.1156		46.735			-22.7591		-27.7611
	20.5277		46.4027			-64.0038		148.032			-57.6357		80.7286			-65.2292		140.251			-56.1891		112.651			-20.4484		169.38			-40.8128		93.4154			-73.2861		20.5758			10.6037		-36.1695			-16.6434		54.0539
	140.692		132.818			-43.9344		213.441			34.6387		78.8344			3.01859		4.71914			-27.9509		130.746			31.2212		86.6714			3.54599		85.8288			-38.9467		54.9241			41.7466		66.9671			-1.56633		59.6704
	4.45681		-0.154912			91.6567		149.63			34.8112		87.8113			-28.6079		134.629			-54.5571		135.006			36.5522		150.577			-4.38168		110.027			-15.5695		131.241			32.8575		68.5254			-12.4217		67.6355
	-6.22612		258.544			3.74179		12.6917			2.9557		76.9475			64.7012		8.94087			-59.7449		2.30485			3.58066		87.3875			29.4626		83.9503			-26.3459		38.2955			-48.5299		31.2822			-50.5174		68.0341
	-72.0924		22.9614			-6.2208		167.451			-16.6988		83.6109			20.9425		29.9371			45.8043		103.272			-62.3596		230.599			0.00779112		70.6439			-26.1657		74.4484			-44.9489		55.6367			-33.2827		74.4689
	70.3505		289.197			22.4369		90.4386			-5.82018					-31.5178		23.1691			135.756		259.513			-1.06492		19.3735			35.0599		121.383			-40.4957		18.561			33.6054		16.7607			76.4841		73.6778
	42.5738		62.6177			120.136		167.13			-8.29775					47.5268		104.22			32.8054		69.6271			-15.6236		98.493			6.23759		62.1879			57.498		6.3762			-44.7046		70.022			-2.46007		60.3136
	83.2962		263.609			17.9124		19.2579			73.1048					-14.9114					174.291		124.209			-26.7372		30.6631			9.80288		61.5882			25.9696					19.3066					22.5965		19.6823
	-58.4193					55.8539					41.5587										-31.7627										52.8757					-15.5153					19.4659					45.8656
	-9.61459					18.5393															58.2517										5.7234					128.792					-68.7262					35.3326
																					-83.041										28.2228					59.3584					17.6851					10.1548
																					-29.9116										38.0499					16.6219					59.0973					31.3956
																															16.975					37.2697										-4.00788
Protein		Clusterin					Galectin-7					IL-1 R4					TWEAK R					L-Selectin					MIP-2					ALK-1					EGF					G-CSF					TRANCE
Time point	sham	7 days	14 days	30 days		sham	7 days	14 days	30 days		sham	7 days	14 days	30 days		sham	7 days	14 days	30 days		sham	7 days	14 days	30 days		sham	7 days	14 days	30 days		sham	7 days	14 days	30 days		sham	7 days	14 days	30 days		sham	7 days	14 days	30 days		sham	7 days	14 days	30 days
	-14.842		17.864			11.6608		-46.7286			-19.6597		3.05239			39.0364		126.495			-74.7502		-27.5006			4.43175		-47.0591			-4.5308		-41.7449			-90.9097		-74.4829			-12.9292		-65.3443			4.58089			201.322
	-27.8141		20.3055			88.0758		-40.0831			-31.217		-12.8047			33.3474		7.21145			29.7485		67.8783			41.6728		-33.6504			-25.2716		-19.8724			200.283		-83.6165			-19.9381		-96.1986			151.728			358.472
	-25.453		-8.64702			-15.3722		-61.6331			45.8017		-38.9327			73.7685		89.2876			-39.4926		15.5764			157.738		-59.8			11.2807		-60.4695			138.899		-34.4302			-3.36887		-53.876			-81.7148			340.627
	-22.3534		-16.6482			-27.2459		-62.7323			-47.3876		-27.7953			7.93394		-44.1817			-37.0838		-61.9669			-9.6814		-45.1024			84.6367		-20.2674			76.7509		-72.0535			-90.884		-96.8014			19.058			89.4127
	-20.3964		29.898			68.8075		-20.4365			-21.9753		-36.9483			28.19		-92.7563			49.7473		-97.2148			76.7446		-30.9098			-38.0444		-94.388			59.9538		-96.2785			-21.1187		-64.6656			-91.5746
	-19.6711		36.0582			3.9953		26.6936			-25.1315		-42.0204			-13.1602		-92.4093			-12.4375		-76.6789			-13.2259		-45.7526			11.5928		-78.794			248.627		-96.8377			-8.98593					-80.2412
	-23.58		13.5738			-7.29322		-27.3981			34.8471		-51.0862			-7.62739		-76.9241			-4.90108		-69.134			-53.1825		-85.3821			-39.6634		-79.0924			-75.2546		-43.2306			-91.8409					150.1
	-9.43691		21.0324			-20.2529		-24.3925			10.0675		-28.6499			-8.99433		-72.2317			91.34		-77.458			-61.488		-52.6157					-78.1711			-95.987		-86.2936			-53.2012					-98.7742
	-9.26343		32.7599			-30.976		-28.0357			51.8505		-34.1934			4.89174		-86.0925			23.0257		-78.1338			-70.5757		-70.3753					-94.5334			-70.225		-83.2436			-16.2413					25.0322
	-5.89118		41.8125			35.5998		-39.5934			32.3048		-43.6314			24.4472		-88.5039			48.4282					121.108		-31.5077								-94.3878		-73.2151			114.677					91.3629
	-3.95966		32.0947			25.8815		11.3731			-3.51769		-35.2624			-4.85597		-70.3562			13.9087					57.571										-19.073		-23.4609			145.858					-89.553
	11.5858		26.4232			-47.7662		-17.2204			25.4261		-38.4363			-19.943		-72.239			-44.016					-56.6494										-2.51567					-31.8487
	17.8411					-20.2488					-21.3494					-39.5113					-46.7268					11.1259										-40.7426					-26.2235
	46.8734					-39.3089					-7.58853					-36.6886					-64.6457					-68.0337										120.785					101.123
	17.7068					9.58926					-17.2796					-14.7667					-6.20694					-25.4809										-97.015					14.9225
	10.8726					-35.2118					15.0652					-34.0518					74.0635					-86.3031										-97.0033
	24.2101					0.0142315					-19.7381					-1.60733										-25.7835										-94.1177
	53.5713										-0.51871					-30.408																				-68.0699
Protein		CTLA4					sFRP-3					IFNg R1					ACE					MMP-10					Chemerin					IGFBP-6					TROY					CCL6					ICAM-1
Time point	sham	7 days	14 days	30 days		sham	7 days	14 days	30 days		sham	7 days	14 days	30 days		sham	7 days	14 days	30 days		sham	7 days	14 days	30 days		sham	7 days	14 days	30 days		sham	7 days	14 days	30 days		sham	7 days	14 days	30 days		sham	7 days	14 days	30 days		sham	7 days	14 days	30 days
	-42.6106			58.4287		136.607			110.495		34.7702			86.5296		-5.67635			35.8754		30.3021	-60.991				40.1194			49.3089		16.0387			22.2179		-21.2182			15.5168		27.0455			-26.1951		-4.82952			-33.0975
	43.2024			251.002		-1.02949			174.305		38.099			93.5357		-6.91683			45.3215		-44.4458	-66.309				-11.1793			68.368		-9.77035			27.1366		-18.2509			15.74		-68.4557			-32.3618		-1.17345			-30.6793
	26.628			46.417		-46.3942			3.43896		-33.0748			83.6137		-44.9071			114.55		-39.9396	-71.9736				-12.1033			51.0747		-57.8977			33.0233		-37.8131			13.7339		-66.9489			-18.7935		-41.8094			-29.0994
	41.9937					20.154			97.0501		-58.6174					-10.585			29.5786		38.3007	-53.9976				-35.4874					-32.8512					-18.1135					-73.4068			-20.2558		-28.8473			-27.9373
	101.55					18.9578					-73.712					48.2775					-49.8807	3.11129				-78.811					-49.9979					23.597					-48.1351					33.9246
	45.3963					-24.7692					31.9457					-13.1215					-36.9625	-8.48847				-51.551					-45.9072					8.19208					-72.4899					2.94719
	-60.568					70.3851					-19.1068					47.7533					-1.91234	-83.928				-15.8566					2.70251					-0.269077					26.2662					-38.5024
	-84.9456					74.3764					73.2302					-18.6708					3.24067	32.4211				15.1729					-8.25958					-6.13328					46.19					-40.672
	-21.5108					87.7047					14.3186					62.4312					-8.20257	-18.5793				66.0566					94.0855					3.37817					21.6973					15.5037
	-49.1431					114.041					-10.1572					-7.03083					34.0332	5.90228				5.81798					54.6242					-3.99484					-27.2828					39.7738
						-73.0816					45.3282					-5.82089					32.1781	-3.09046				18.4186					23.6942					30.8473					20.8023					-12.6358
						-67.3845					-3.67133					-2.7087					0.000373534					15.1162					16.9656					12.8911					14.813					8.91931
						-61.5858					-19.5312					-10.8097					2.19099					20.6098					7.83762					-11.8405					4.39935					-1.29423
						-53.2598					-43.1219					3.10918					1.99995					-18.7531					1.87841					4.48132					48.8429					41.8964
						-63.7986					-50.9672					-20.8312					-22.6067					-28.5815					-21.2463					-15.5657					4.06519					-35.8258
						-50.3459					41.2487					-45.4217					-7.19314					32.3137					-16.4412					34.7199					44.2353					13.696
						-37.9755					32.8465					39.5816					69.4648					38.6975					13.3046					15.091					24.1173					-0.355986
						-42.6104										-8.65238															11.2394										74.2919					49.2849
Protein		IFNg					IL-2 Ra					OPG					CRP
Time point	sham	7 days	14 days	30 days		sham	7 days	14 days	30 days		sham	7 days	14 days	30 days		sham	7 days	14 days	30 days
	18.9678			-47.1428		-14.882			-35.5577		-73.6916			-57.8323		66.5896			-42.7554
	-36.2662			-25.7992		-15.3571			-45.479		-62.7088			-78.6121		-65.6594			-63.3813
	-36.1079			-23.6487		62.1876			-26.6769		-46.1873			-27.7559		-73.0976			-55.4073
	5.59476					72.4975			-38.4984		-78.4593			-63.871		-77.4491			-66.7344
	29.2356					61.4875					10.1596					17.5318
	27.4825					1.83148					-36.9221					-71.8453
	6.97991					-12.277					-87.1063					116.132
	-4.09416					2.57337					-88.1829					114.907
	-22.8221					-50.9586					-94.1171					-50.0585
	-2.02777					-8.01716					-86.4775					-54.6358
	-4.90318					-13.7117					20.7586					50.9615
	17.9616					-9.53284					45.7286					-11.5359
						-23.2881					91.8811					-25.9288
						4.30506					6.98588					43.4268
						-17.6831					108.534					25.3252
						-23.4061					114.441					-46.2425
						5.52626					130.745					27.9534
						-21.3192					124.624					13.0282
