# Supplementary material for: Time-dependent cytokine and chemokine changes in mouse cerebral cortex following a mild traumatic brain injury
Source: eLife. 2020 Aug 17;9:e55827. doi: 10.7554/eLife.55827 (PMC7473773; doi:10.7554/eLife.55827)
Supplement: Figure 4—source data 1. [file elife-55827-fig4-data1.xlsx]

## Sheet: Figure 4 A-D
Source data for Figure 4	Number of proteins in each pathway over time
	Pathological - Cell Death		Time	# of proteins	# of proteins	# of proteins				Physiological - Cell Survival		Time	# of proteins	# of proteins	# of proteins	# of proteins
	Panel A		8	1	1	1				Panel B		8	2	0	0	0
			24	2	1	1						24	1	1	1	1
			48	2	1	2						48	2	2	3	0
			72	3	1	1						72	0	1	0	1
			96	2	1	1						96	1	2	1	1
			7	1	1	1						7	2	1	1	1
			14	1	1	1						14	0	2	2	1
			30	0	0	0						30	2	1	0	0
	pathway name			Apoptosis	Fas signaling	AD				pathway name			Angiogenesis	Wnt sig	CCKR sig	GDNF sig
	Physiological - Cell Survival		Time	# of proteins	# of proteins	# of proteins	# of proteins	# of proteins		Context Dependent Pathways		Time	# of proteins	# of proteins	# of proteins	# of proteins	# of proteins
	Panel C		8	1	1	0	0	0		Panel D		8	2	1	1	1	0
			24	0	0	0	0	0				24	8	1	3	1	1
			48	0	0	1	0	0				48	3	0	2	1	1
			72	0	1	0	1	0				72	4	1	3	0	1
			96	0	1	0	1	0				96	3	0	1	0	1
			7	1	0	0	0	1				7	6	0	3	0	1
			14	0	2	0	1	0				14	2	0	0	0	1
			30	0	0	0	0	1				30	3	2	3	0	0
	pathway name			PDGF sig	EGFR sig	Plasminogen	TGF-beta sig	NOTCH sig		pathway name			Inflammation	IFN-g	interleukin	FGF sig	Cadherin sig
