# Supplementary material for: Time-dependent cytokine and chemokine changes in mouse cerebral cortex following a mild traumatic brain injury
Source: eLife. 2020 Aug 17;9:e55827. doi: 10.7554/eLife.55827 (PMC7473773; doi:10.7554/eLife.55827)
Supplement: Figure 5—source data 1. [file elife-55827-fig5-data1.xlsx]

## Sheet: Figure 5 A-H
Source data for Figure 5	raw data pg/1.5 mg										raw data pg/2.0 mg										raw data pg/1.5 mg										raw data pg/1.5 mg
	A: Fas L										B: VEGF-B										C: CXCL16										D: Fractalkine
	Sham	8	24	48	72	96	7	14	30		Sham	8	24	48	72	96	7	14	30		Sham	8	24	48	72	96	7	14	30		Sham	8	24	48	72	96	7	14	30
	410.5	249	463.2	201.3	320.5	62	333.1	309.4	267.2		65.1	153.5	98.4	136	82.9	353.8	211.6	144.2	106.9		63.5	44.4	44.7	50.5	56.1	23.5	53.3	55	51		21697	29215.9	16366.4	13160.4	17566.6	11358.6	17450	16541.1	14185.3
	580.5	241.3	235.4	151.2	338.9	230	342.3	305.3	199		83.3	186.6	117.1	252.2	189.9	282.1	70.4	72.8	111.8		111.6	47.4	38.9	25.7	53.1	50.4	39.9	34.8	87.9		25958.9	18502.5	13687.8	9276.9	19011.5	11743.2	14475.1	15207.2	22776.6
	839.1	329.2	542.4	120.5	248	162.1	245.7	188.3	274.3		75.7	89.4	107.5	58.7	87.8	138.1	384.8	106.4	124.1		46.5	63.1	51.5	35.2	69.8	55.1	41.5	37.6	50.6		26452.2	25907.8	19131.7	8470.8	20261.9	7921.7	14291.3	14345.6	15983.6
	711	451.3	306	39.2	248.1	215.3	221	376.9			103.1	244.1	135.7	61.3	147.1	141.9	264.5	115.5			99.6	50.5	41.6	29.2	53.2	47.8	45.5	43.3	72.3		22765	17046.7	16683	10523.7	16519.6	9693.9	17124.1	8573.1	20160.5
	956.8	587	100.4	162.8	280.3	276	119.1	188.6			79	343.7	166.1	103.3	174.8	128	196.1	163.1			125	74.5	52.7	52.8	26.9	44	51	46.4			19107	16371.1	10966.2	9445.1	8824.5	7735.7	10094.2	14584.1
	569.5	310.9	140	162.9	188	395.3	319.3	172.7			76.5	366.1	97.2	115.3	143.9	240.9	395	130.9			78.4	75.9	38.8	35	43.6	36.6	30	63.6			15257.4	16758.7	14729	9249.2	10507.4	7045.6	8124.5	10243.9
	380.2	453.1	131.7	263	180.9	163.1	102.3	201.7				110.9	62.3	187.3	102.2	137.7	336.9	159.2			47.3	79.2	41.6	55.8	51.1	48.5	34.8	54.8			12430.4	16886.4	11604.3	13295.5	12199.5	9700.1	9714.5	13154.9
	379.8	271	242.8	87.2	262	465.6	276.9	382.9				61.1			278	245.4		228.6			39.5	56.5	48	23.8	31.2	50.9	22.6	60.4			14618	14712.6	12546.7	7668.7	9271.4	8978.2	4656.7	13621
	324.3	247.4	203.4		282.7		198.4	143.4							107.2			150			66.2	80.1	44.2		35.9		65.4	57.7			15197.9	14010.2	14772.1		11166.7		9972.4	12431.8
	296	304.3	149.7		247.5		229.2	353.3										262.3			63	69.3	43.2		38.3		57.4	58			18042	15339.1	10438.1		9313		11171	13143.8
	408.8	250.8	119.8		97		136.5	109.2													75.1	63	30.8		54.4		57.8	50.9			14391.5	15338.1	13195.1		13847.6		12611.6	14468.6
	475.7	99.5	84.1				190.3	355.4													68.6	46.5			37.2		78.3	54.3			15250.7	12743.8	11731.7		11139.5		17994.3
	95.4																				53.6										13269.4
	668.4																				57.8										13518.7
	149.3																				48.6										13277.8
	310.2																				47.9										13464.8
	160.4																				54.9										15290.6
	452.9																				61.7										15204.9
	raw data pg/1.5 mg										raw data pg/1.5 mg										raw data pg/1.5 mg										raw data pg/1.5 mg
	E: GAS-1										F: MIG										G: IL-1 ra										H: IL-17E
	Sham	8	24	48	72	96	7	14	30		Sham	8	24	48	72	96	7	14	30		Sham	8	24	48	72	96	7	14	30		Sham	8	24	48	72	96	7	14	30
	116.2	161.8	117.6	184.3	171.4	173.1	126.1	135.8	117.3		800.7	365.4	686.6	962.6	792.8	511.7	653.9	455.6	701		34.9	25.1	6.3	4.5	32	9	0.9	0.4	12.5		12.3	308.5	33.8	493.9	246.4	633.3	386.5	194.6	238.4
	124.7	197.2	115.8	136	178	194.4	120.8	91.3	133.2		715.6	253.4	844.7	668.8	752	506.1	440.7	832.5	430.3		18	1.5	7	13.9	1.1	14.7	4.4	2.1	11.1		110.5	32.1	28.7	207	147.4	546.7	432.8	47.1	128.3
	86.4	135.5	109.6	167.5	176.6	190	117.9	76.9	149.6		686.4	311.5	757.6	772.4	216.6	783.4	304.7	219.9	838		17.9	8.5	2.6	2.1	1.4	20.1	4.2	1.1	11.2		53.8	49.1	75.9	221.9	265.1	249.8	135.1	119.9	489.4
	99.8	171.3	139.4	138	141.4	185.2	166.3	141.7	134.9		1090.8	673.8	559.2	810	275.8	384.5	270.8	288.4	397.6		25.9	10.2	6.4	9	47.9	8.2	3.4	17.3			89.5		53	141	215	217.4	364.4	174.8	373.6
	136.6	127.6	166.9	153.3	158	155.9	248.4	182.9			903.6	1171.7	723.1	966.3	838.9	665.1	756.5	847.2			6.9	17.9	3.3	7.8	8.3	19.5	0.2	8.1			173.9	81.1	92.8	442.5	264.1	246.2	338.7	211.2
	101.6	111.2	165.2	151	174.3	114.8	147.2	158.4			1243.7	765	837	747.9	1079.2	709.2	547	666			15.2	24.2	5	25.8	0.3	0.3	8.1	2.6			347.2	62.5	218.5	271.7	316.2	223	203.6	335.8
	144.7	178.3	172.1	167.5	180	153.2	148.9	150.6			761.5	869.3	601.7	903.5	695.3	506.4	389.1	1148.4			41.9	0.8		12.3	12.2	3.1	15.8	26.7			150.7	452.7	128	383.2	324.7	213.6	436.6	144
	142.7	119.2	154.9	182.7	166.6	189.3	101.7	126			841.5	1229	543.4	513.2	813.6	1030.6	627.1	699.7			18.4				2.8	11.9		3.1			135.3	129.2	121.4	174.8	262.1	330.6	37	517.2
	143.7	196.6	140		151.3		167.6	148.6			649.4	883.4	698.8		653.8		683.4	323.5			25.3				6			15			40.3	570.8	259.1		276.1		530.6	177.4
	184.7	110.7	129.6		139.8		173.4	135.2			616.7	670.5	564		801.2		763.1	1012.6			9.3				15.5			4			245.7	560.9	328.4		354.2		308.4	561.4
	95.2	196.3	170.3		177.8		222	162			960.2	1024.9	737.2		517.6		608.1	483.8			7.3										205.7	156.3	151.2		342.7		655.4	234.6
	107.9	195.2	172.5				203.7				1037.9	793.6	703.3		635.2		843.7	845			13.8										264.4	281	175		147.9		612.6	524.5
	90.5										843.9										27										60
	106										1284.9										26.9										130.4
	72.9										660.9
	75.2										764.7
	127.8										740.2
	132.9										839.9
