# Supplementary material for: Time-dependent cytokine and chemokine changes in mouse cerebral cortex following a mild traumatic brain injury
Source: eLife. 2020 Aug 17;9:e55827. doi: 10.7554/eLife.55827 (PMC7473773; doi:10.7554/eLife.55827)
Supplement: Figure 6—source data 1. [file elife-55827-fig6-data1.xlsx]

## Sheet: Figure  6
Source data for Figure 6	RAW RFU data values for each protein
	A: C-reactive protein, RFU
	sham	8 hrs	24 hrs	72 hrs	7 days	14 days	30 days
	414.9	420.7	410.8	427.9	424.8	430.8	439.5
	416.4	413.1	412.8	421.7	435.7	501.5	459.1
	441	438.8	413.4	419.3	439.3	437.7	465.4
	409.5	417	412.7	399.4	472.8	426.6	438.8
	339.5
	377
	441.4
	447.4
	422
	434.8
	B: Interleukin-6, RFU
	sham	8 hrs	24 hrs	72 hrs	7 days	14 days	30 days
	175.1	171.7	147.4	133.2	157.2	155.1	147.5
	174.9	175.2	176.7	149.2	139.5	153.2	138.9
	137	164.8	229.5	170.1	131.7	192.7	135.7
	180.2	265.3	167.1	165.1	124.6	176	116.3
	192
	213.1
	145.6
	151.9
	142
	181.2
	C: Interleukin-13, RFU
	sham	8 hrs	24 hrs	72 hrs	7 days	14 days	30 days
	542.1	490.8	469.5	460.9	482.6	476.2	417.6
	505.5	502	473.9	456.3	464.1	527	447.5
	483.5	495.6	496.4	471.4	489	452	474.3
	420.8	649	463.6	470.6	448.5	466.3	465.7
	492.4
	491.2
	521.1
	478.1
	478.4
	477.8
	D: MIP-3b, RFU
	sham	8 hrs	24 hrs	72 hrs	7 days	14 days	30 days
	141.9	116.4	162.1	111.5	209.8	134.9	131
	119.9	133.9	132.4	114.1	119.5	163.4	117.2
	115.5	132.2	180	123.6	140.1	133.8	131
	123.1	175	129.6	124.9	138.1	132.2	134.2
	110.3
	97.5
	131.8
	126.3
	131.6
	129.2
