# Supplementary material for: Time-dependent cytokine and chemokine changes in mouse cerebral cortex following a mild traumatic brain injury
Source: eLife. 2020 Aug 17;9:e55827. doi: 10.7554/eLife.55827 (PMC7473773; doi:10.7554/eLife.55827)
Supplement: Source data 1. — This file contains the raw data obtained from the Antibody Array studies undertaken with the five different arrays. Provided are the different treatment groups, the protein names, the upper and lower limits of the assay detection and the individual data points as pg. The assay proteins loading conditions have been described in the methods section. The sample identity is provided. This file contains all of the original data related to Figures 1–5, describing the cortical tissue protein changes over time. [file elife-55827-data1.xlsx]

## Sheet: Cortical Array data 
	Source data for cortical tissue antibody arrays, these data relate to Figures 1 to 5.
			CYT-4 antibody array
			LOD	1.40469	0.386217	4.80104	17.3466	0.905105	1.59307	7.73416	3.84609	80.5003	3.75491	75.8842	141.728	682.744	43.4643	38.7538	29.1869	28.0308	10.9691	3.07833	0.193445	1.03655	8.9993	331.15	6.30757	4.27356	0.489862	5.66123	0.00301547	2.99695	0.468485	18.5715	14.4518	7.80887	0.167639	28.6074	14.0895	107.399	0.105857	0.275096	1.31157	LOD
			MAX	2000	10000	20000	10000	10000	1000	2000	4000	100000	4000	20000	100000	20000	40000	40000	10000	4000	40000	40000	4000	10000	20000	40000	2000	20000	1000	1000	1000	20000	20000	10000	100000	4000	2000	10000	100000	100000	4000	4000	4000	MAX
			Protein name	AR	Axl	CD27L	CD30	CD40	CXCL16	EGF	E-selectin	Fractalkine	GITR	HGF	IGFBP-2	IGFBP-3	IGFBP-5	IGFBP-6	IGF-1	IL-12p70	IL-17E	IL-17F	IL-1ra	IL-2 Ra	IL-20	IL-23	IL-28	I-TAC	MDC	MIP-2	MIP-3a	OPN	OPG	Prolactin	Pro-MMP-9	P-selectin	Resistin	SCF	SDF-1a	THPO	VCAM-1	VEGF	VEGF-D	Protein name
			sham -1	11.8525	200.351	0	0	133.407	63.494	42.5598	0	21697	13.7263	720.718	2382.14	5495.05	857.124	1493	24684.2	0	12.2993	49.2284	0	21.1229	33.3039	661.657	3.12374	136.554	7.26835	50.1513	0.109397	420.11	12.2247	178.781	67.5869	305.385	11.4939	369.783	7.44867	950.835	16312.8	14.553	0	sham -1
			sham -2	11.5163	279.863	0	27.9704	104.527	111.6	1405.89	0	25958.9	18.8525	1058.92	925.99	3334.71	702.262	1160.93	40540.2	0	110.455	61.645	0	21.005	17.0632	297.589	4.79756	10.1558	8.30145	68.0355	0	376.067	17.3281	530.781	86.6596	1107.58	3.15298	352.176	0	418.557	17565.8	15.0785	0	sham -2
			sham -3	17.3005	197.377	0	13.5822	100.705	46.5475	1118.49	99.3692	26452.2	34.2588	896.826	392.568	5572.34	565.975	541.702	69861.4	31.4321	1164.38	86.853	34.9272	40.2485	45.8527	751.584	6.61946	42.7797	8.80996	123.774	0.754776	111.652	25.0051	561.158	183.529	497.959	11.2571	530.941	2.63884	103.033	19582.9	13.8792	0.99049	sham -3
			sham -4	14.0725	238.131	0	4.98472	95.434	99.5583	827.525	24.6695	22765	21.7797	599.198	1249.53	3242.62	506.414	863.96	32990.1	0	531.777	60.5244	18.0268	42.807	23.1036	888.025	6.16375	84.8214	7.61969	43.3737	0.926423	121.219	10.0093	391.296	78.5817	466.097	11.6907	375.505	3.57929	378.782	16832	13.8556	2.25206	sham -4
			sham -5	14.8402	270.14	3.22841	0	200.732	125.642	748.883	129.507	19107	29.8884	1411.54	1408.07	3599.03	936.317	643.344	79166	13.1018	693.675	100.982	17.9419	40.0747	33.7297	376.528	5.7252	33.9054	10.1042	84.8781	0.335967	742.724	51.1878	284.358	135.602	1783.85	6.16129	387.579	29.872	222.935	15296.4	13.6851	0	sham -5
			sham -6	15.7534	247.836	0	0	164.707	78.3812	1632.23	60.3671	15257.4	17.7302	727.008	2251.38	2601.24	502.117	695.977	49222.2	34.0442	826.55	77.0405	25.9175	25.2705	95.8433	177.714	3.94479	128.853	8.55074	41.6715	0.347726	305.513	29.3104	343.51	147.717	1013.9	14.6097	673.401	42.006	817.975	15375.8	15.4809	0	sham -6
			sham -7	7.7184	85.1118	0.509491	0	0	47.3468	115.855	39.006	12430.4	14.1383	546.95	1717.93	2497.86	576.927	1321.41	25196	127.66	53.8144	39.569	6.92585	21.7693	38.9964	1655.02	1.50645	32.8277	8.52207	22.4832	0.409881	391.537	5.99131	113.111	87.5378	663.067	14.0814	189.715	3.83587	370.692	13041	10.6549	0	sham -7
			sham -8	7.2518	126.564	0	0	0	39.4702	18.7883	20.1574	14618	13.1427	589.31	1140.13	2220.92	617.894	1180.36	23625.9	1.04674	89.4997	29.2638	0.115104	25.4546	15.6688	812.911	2.75497	5.86111	4.62557	3.92007	0.193035	366.983	5.49104	131.015	64.8148	466.509	32.5562	174.919	0	402.315	11684	12.2672	0	sham -8
			sham -9	6.09392	101.095	0	0	0	66.2056	139.403	10.5654	15197.9	17.1865	713.433	3080.05	4715.57	1411.55	2497.17	14454.2	212.881	173.855	33.0881	0	12.1701	81.528	1497.18	0.729553	67.0107	4.95285	18.4946	0.306129	1192.65	2.7336	156.058	85.8112	715.291	29.8748	215.394	26.2276	2036.95	14530.8	12.7353	0	sham -9
			sham -10	7.20599	203.344	0	0	0	62.9912	26.2755	0	18042	11.862	604.011	2560.77	4051.92	1738.9	1989.45	25703.8	136.464	347.186	42.317	15.2379	22.8265	24.4909	857.745	3.50508	80.5025	4.96013	14.1304	0.269566	142.172	6.28352	265.804	77.7449	814.87	41.2511	302.126	6.98405	1397.25	12742.5	11.7012	0	sham -10
			sham -11	9.11418	143.527	0	0	29.6885	75.0627	378.889	54.5942	14391.5	15.758	732.413	1146.15	5109.28	946.475	1591.49	12611.1	0.132078	150.674	61.9763	41.9118	21.4133	114.72	967.885	6.1905	84.3274	6.90268	106.183	0.64339	152.064	56.1129	212.418	44.2054	539.533	28.0112	165.452	5.81738	1019.69	15680.1	12.663	2.56554	sham -11
			sham -12	10.8444	175.567	0	0	37.1996	68.5764	456.409	50.4294	15250.7	15.4695	926.832	1351.11	5412.01	953.961	1504.92	19762.8	7.6892	135.264	59.678	18.3802	22.4503	99.9101	973.896	5.02644	81.3796	5.56246	75.6703	0.165305	369.049	67.7157	218.418	43.0778	601.745	19.0789	335.025	9.3742	1299.63	11998.7	12.8922	0	sham -12
			sham -13	9.2716	172.717	0	36.3757	25.525	53.6189	277.436	18.3517	13269.4	17.9614	594.978	1086.99	4907.33	972.779	1387.48	13524.7	0	40.2552	58.9007	25.3199	19.0368	90.3379	387.395	3.33121	77.5064	4.31929	20.8182	0.18085	152.739	89.1614	220.79	25.9327	375.421	22.0116	225.097	0	534.232	11829.9	11.7908	0	sham -13
			sham -14	10.1136	182.933	0	0	38.2616	57.8495	1033.69	94.7646	13518.7	18.6469	720.71	1608.85	5458.55	1259.39	1310.8	24975.8	15.1361	245.722	61.0722	9.29143	25.8843	66.1394	512.03	6.59103	90.8395	5.2405	53.366	0.0837592	329.552	49.7131	310.558	54.1865	741.639	20.6612	211.963	3.14563	1216.38	14068.3	13.0933	0	sham -14
			sham -15	13.1946	153.565	0	27.033	45.238	48.6105	13.9756	2.41423	13277.8	6.99796	558.908	997.022	4198.28	1045.33	1013.27	15606.9	26.2632	205.656	60.7653	7.28771	20.4278	46.7776	177.014	3.51505	83.2917	5.35488	15.3512	0.287002	329.992	96.8995	246.316	28.3916	415.62	10.9462	183.291	0	408.418	12859.6	10.9884	0.465158	sham -15
			sham -16	10.18	137.98	0	16.9023	8.33946	47.8773	14.03	34.8963	13464.8	17.8895	693.296	1212.31	4808.51	1053.72	1075.1	17110.9	35.2107	264.396	53.6013	13.8059	19.0075	37.4274	511.947	5.04871	49.0344	4.87312	35.7863	0.362527	86.3855	99.6442	208.32	43.5362	220.683	23.2701	105.708	0	308.028	13564.9	11.3424	0	sham -16
			sham -17	10.8966	268.366	0	53.5038	78.5943	54.8966	27.54	56.8348	15290.6	15.7355	836.339	1383.55	5925.99	1385.82	1457.82	20089.4	18.8423	59.9781	50.7632	27.0322	26.1874	53.9898	361.546	3.75839	54.5026	5.0767	6.57767	0.160631	325.073	107.22	289.798	45.8952	1392.6	9.3714	129.792	0.974876	555.628	13378.4	12.896	0	sham -17
			sham -18	10.6795	178.821	0	0	61.2757	61.6829	149.493	1.52475	15204.9	25.7571	1156.69	1861.4	5125.76	1198.35	1431.25	19841.2	6.34596	130.376	48.575	26.938	19.5254	76.9914	287.198	2.72588	64.9466	5.52782	35.641	0.11054	439.463	104.376	390.152	45.8383	510.057	8.34454	248.63	3.02762	843.861	13231.3	14.4027	0	sham -18
			TBI 8 hr -1	5.41099	155.601	0	0	0	44.4203	42.1161	0	29215.9	20.1073	650.69	3208.38	5168.54	1429.64	1490.23	25822	183.144	308.493	43.6121	0	19.2564	17.4829	1429.53	0.530657	30.1383	10.4284	0	0.0946704	127.701	14.961	126.318	93.0971	81.2638	15.7391	244.347	26.4202	376.303	13720	13.2377	0	TBI 8 hr -1
			TBI 8 hr -2	8.96676	196.686	0	18.9944	6.07149	47.4207	290.693	0	18502.5	3.30728	828.254	3050.27	3389.63	1578.04	1531.32	39651.4	92.3248	32.0932	56.4052	0	4.08826	15.3207	286.7	2.07521	93.732	5.96326	5.91794	0.24211	130.939	17.1487	382.178	79.5081	348.108	8.56907	155.893	0	404.18	12910.6	12.943	0	TBI 8 hr -2
			TBI 8 hr -3	6.94181	165.187	0	35.2503	0	63.0946	61.6554	0	25907.8	17.133	472.319	2440.32	5526.56	1055.02	1369.92	28782.4	182.88	49.1181	53.9637	0	1.81999	12.565	719.445	2.31351	67.3084	5.75035	23.9588	0.39066	241.341	23.4758	202.338	88.1256	501.37	28.5543	173.952	19.6314	531.798	11518.2	12.744	0	TBI 8 hr -3
			TBI 8 hr -4	9.24144	155.87	0	0.0375845	5.66204	50.4541	1919.56	0	17046.7	6.02628	338.09	1793.22	3180.35	569.871	1119.57	35890.7	56.7614	0	49.591	0	7.63041	0	264.949	2.35195	66.9545	5.6974	0	0.204164	250.565	12.1678	570.515	102.339	96.8234	18.6366	212.487	0	223.624	12405.9	10.9694	0	TBI 8 hr -4
			TBI 8 hr -5	10.7159	229.547	0	0	152.136	74.5468	369.68	37.5421	16371.1	17.0917	1164.84	1441.8	7234.84	1520.21	1803.68	22777.9	0	81.1094	38.3798	25.0829	42.2408	74.2584	408.62	4.06415	45.5328	7.62202	87.2893	0.11375	844.626	123.349	181.312	34.1874	1728.23	37.2874	468.494	3.59124	568.08	15346.7	16.3661	0	TBI 8 hr -5
			TBI 8 hr -6	9.29489	170.181	0	0	69.3824	75.9271	77.3548	48.841	16758.7	13.0834	776.263	1294.99	5130.24	1355.56	1761.38	13686.7	0	62.5257	42.8036	1.51411	23.5728	123.292	577.417	5.21478	66.2782	4.57241	76.3788	0.515026	926.179	90.1596	219.227	46.4682	1686.86	8.83477	288.43	0.417356	871.359	15188.6	13.0121	0	TBI 8 hr -6
			TBI 8 hr -7	13.6622	160.193	0	6.80722	93.0787	79.1945	502.022	17.6762	16886.4	17.4742	831.197	1429.23	6033.84	1334.83	1610.33	14754.7	33.5523	452.729	57.3918	8.46082	28.7317	96.7013	311.008	4.18749	105.461	6.18375	77.5671	0.328529	366.295	110.229	209.033	113.344	1010.69	22.3445	349.435	7.21809	541.171	13903	13.8681	0	TBI 8 hr -7
			TBI 8 hr -8	10.6458	148.676	0	0	0	56.4799	273.496	58.5301	14712.6	12.9593	652.642	1482.68	4237.12	1128.21	1471.14	19328.3	8.95521	129.18	45.8581	0	23.0156	86.2544	361.653	4.55666	93.0013	6.55847	67.8646	0.00514338	299.139	46.3539	222.995	62.1365	876.867	19.2951	196.307	0	698.851	13547.5	13.472	0	TBI 8 hr -8
			TBI 8 hr -9	11.121	263.835	0	0	227.518	80.1208	886.149	107.727	14010.2	24.9559	1269.56	1732.22	6201.79	1578.91	1586.02	25521.4	29.4912	570.817	78.7683	10.2459	25.3556	65.4811	58.5477	2.94933	156.987	7.23566	60.3335	0.25175	426.631	96.5625	1473.63	65.1675	776.765	39.2652	415.613	9.40802	763.511	18949.9	18.6775	0.428019	TBI 8 hr -9
			TBI 8 hr -10	13.1266	194.168	0	100.122	47.3858	69.3059	372.496	29.1325	15339.1	16.067	978.629	1234.84	6111.72	1155.9	1757.59	22704.9	88.9937	560.86	73.3058	17.9216	38.1328	124.424	828.511	5.29969	134.59	6.74372	60.9577	0.0512318	373.749	71.5076	361.476	109.963	1429.94	51.452	571.468	41.1111	1731.17	20986.4	13.4385	0	TBI 8 hr -10
			TBI 8 hr -11	9.47596	195.782	0	0	77.491	62.9606	141.444	19.2649	15338.1	15.3492	732.554	1621.32	4607.63	1127.89	1534.17	18237.1	0	156.268	48.599	24.1915	36.6716	76.9551	597.417	3.08532	136.31	6.31953	95.1966	0.082849	440.126	53.3929	99.0064	47.0733	425.583	9.13352	170.125	0	523.997	14165.4	14.7736	0	TBI 8 hr -11
			TBI 8 hr -12	9.57725	248.588	0	37.286	40.6617	46.4867	79.3096	5.29189	12743.8	0.509095	885.19	1518.54	3116.61	1014.1	1162.95	40274.5	0	280.997	33.4917	0.82705	10.3987	0.931886	0	2.42654	41.1645	4.98699	0	0.00193761	496.882	48.8656	226.606	24.2291	716.263	22.309	317.814	0	0	15506.7	15.1928	0	TBI 8 hr -12
			TBI 24 hr -1	4.65666	157.39	0	0	0	72.9961	380.231	0	16366.4	18.7737	673.355	2632.59	3499.14	890.271	857.126	34184.5	131.725	33.8111	43.6528	0	15.7209	4.59508	462.627	0.963563	10.4032	7.1148	0	0.382718	277.363	10.6965	111.488	79.9137	499.187	0	228.635	0.000109888	110.383	10793.5	11.5737	0	TBI 24 hr -1
			TBI 24 hr -2	8.5295	195.605	0	0	0.758592	44.6978	104.884	2.19618	13687.8	7.84815	252.953	1827.58	2269.35	530.043	891.578	42793.3	58.9425	28.726	52.1099	0	8.2706	0	0	2.20181	45.3076	5.01179	0.0913046	0.328165	226.491	9.36087	174.656	41.0742	393.101	0.961593	248.263	0.606149	0	11345	10.8989	0	TBI 24 hr -2
			TBI 24 hr -3	6.63806	147.741	0	0	0.869907	38.9302	100.024	0	19131.7	9.15028	645.961	1847.1	4062.97	518.687	1034.88	26410.2	155.885	75.9408	48.2411	0	4.85988	4.80396	490.6	0.670865	1.95612	6.75556	0	0.117902	387.438	13.6273	160.806	86.0678	210.78	0	301.721	0	0	14079.3	9.90038	0	TBI 24 hr -3
			TBI 24 hr -4	14.3758	215.651	0	3.76905	0.298769	51.4525	907.88	0	16683	8.68318	715.515	2519.16	2667.34	699.306	921.034	58615.9	47.958	52.9525	87.6126	0	14.2353	18.0779	26.5051	2.61113	104.708	6.72302	44.2078	0.610371	382.106	28.609	574.234	65.1622	450.708	18.6552	307.179	0	348.176	11031.2	13.5562	0	TBI 24 hr -4
			TBI 24 hr -5	10.4766	211.557	0	0	37.0003	41.6416	5.72301	52.2115	10966.2	10.0659	1163.44	1557.82	3946.64	819.91	829.59	25110.8	0	92.7916	34.892	6.31211	33.5247	15.7156	0	3.77487	20.8214	11.2192	33.8263	0.232063	410.964	116.909	756.86	32.5741	529.315	7.67842	382.352	0	0	16264.1	15.3116	0	TBI 24 hr -5
			TBI 24 hr -6	9.85404	237.54	0	0	7.89339	52.7415	0	2.29556	14729	7.74445	892.921	2338.75	4904.05	935.855	1243.68	25051.7	0	218.508	63.9579	7.00905	17.2467	54.3141	0	1.94888	100.207	6.42275	19.3932	0	491.725	62.1943	220.595	30.7858	395.975	18.1705	248.124	0	190.294	13144.7	13.3202	0	TBI 24 hr -6
			TBI 24 hr -7	9.95185	231.635	0	91.9752	43.1219	38.8044	1012.47	26.4561	11604.3	7.48623	952.814	1585.92	5729.8	1068.96	1140.65	31278.5	0	127.968	42.7881	0	19.1514	26.4071	0	3.53105	76.9766	7.75634	33.4887	0	644.877	103.728	257.505	37.3199	711.408	6.96502	161.598	0	61.3852	12776.6	12.3013	0	TBI 24 hr -7
			TBI 24 hr -8	10.626	214.405	0	73.3901	53.6891	41.5909	2893.37	27.5264	12546.7	20.2185	761.557	1405.12	5372.7	870.894	728.624	19208.3	0	121.402	69.9438	2.56863	24.9007	29.0981	0	4.10683	63.2933	5.20758	14.2386	0.229247	253.449	80.5276	289.247	2.33283	654.935	11.4781	251.011	0	0	12191.3	13.1743	0	TBI 24 hr -8
			TBI 24 hr -9	11.6357	219.99	0	0	84.9581	48.0325	726.284	23.1831	14772.1	10.5723	844.061	1563.68	5711.03	1075.95	1350.56	27031.4	5.35144	259.067	58.0319	6.39232	26.6446	58.5177	82.5907	3.00938	85.9206	5.53573	43.9719	0.44732	248.985	103.501	330.74	41.2931	600.3	10.5214	355.031	0	306.653	13389.4	12.7486	0	TBI 24 hr -9
			TBI 24 hr -10	11.1528	178.451	0	38.3662	23.7498	44.1516	1155.28	30.5223	10438.1	14.372	692.268	1390.99	4490.76	911.92	829.463	23625.8	0	328.403	59.5814	3.28811	20.9532	23.9713	0	4.53193	102.386	4.19351	75.5739	0.143511	234.04	84.673	263.877	42.1907	1090.06	0	132.388	0	0	14654.4	13.0849	0	TBI 24 hr -10
			TBI 24 hr -11	10.5294	214.118	0	0	92.8961	43.1563	459.789	29.6623	13195.1	12.0111	1038.16	1791	3321.35	1251.73	1118.3	30933	0	151.201	55.6991	5.00476	23.4763	13.8457	0	3.08754	51.8338	6.17999	16.188	0.322377	230.911	64.5236	117.467	57.937	615.229	24.3233	282.453	0	0	14049.1	12.7754	0	TBI 24 hr -11
			TBI 24 hr -12	10.9087	218.673	0	0	6.69252	30.7657	1776.21	0	11731.7	2.92169	861.227	1466.6	2395.94	858.177	876.043	36064.5	0	175.017	61.3808	0	20.4615	14.3287	0	1.0165	20.329	7.43423	11.3846	0	366.124	21.7859	118.151	0	515.163	0.173042	308.628	0	0	13530.1	12.8504	0	TBI 24 hr -12
			TBI 48 hr -1	11.8203	275.92	0	0	100.461	50.524	1427.01	61.7324	13160.4	7.43536	1054.1	2314.25	4628.91	1398.4	1139.02	25371.6	0	493.85	54.3488	0	21.9246	18.0888	43.6747	5.01384	95.3445	6.06509	49.3455	0.29625	827.841	132.611	183.586	53.794	752.516	39.5147	428.467	0	0	16940	14.6635	0	TBI 48 hr -1
			TBI 48 hr -2	11.123	229.396	0	0	0	25.6771	1008.98	0.598493	9276.92	10.6989	939.981	842.587	1515.85	880.674	562.027	32928	0	207.007	39.5056	4.4698	19.471	12.9294	0	1.98628	45.3101	8.61302	30.4047	0.565436	415.126	92.457	337.414	38.0239	773.449	21.3243	249.646	0	0	12521.5	12.9678	0	TBI 48 hr -2
			TBI 48 hr -3	10.3427	260.904	0	0	104.181	35.1552	1625.73	83.3613	8470.77	11.2989	1052.73	1115.61	3417.11	923.071	782.289	27622.4	16.4041	221.927	54.8508	13.9137	18.6844	7.93892	0	3.46245	57.2212	7.58041	88.1001	0.110301	1074.24	100.482	380.976	56.9973	563.131	11.9992	446.716	0	0	17375.5	14.774	0	TBI 48 hr -3
			TBI 48 hr -4	8.4942	211.364	0	0	0	29.1747	485.391	48.6438	10523.7	5.83106	837.975	1166.91	1497.13	583.454	762.509	25939.1	0	140.965	52.9013	2.09577	20.5993	0	0	2.99227	71.5934	6.62417	28.1872	0.171202	1542.42	76.4164	224.426	21.4174	816.728	3.33251	319.577	0	0	14886.9	13.6383	0	TBI 48 hr -4
			TBI 48 hr -5	12.4281	181.295	0	62.6576	83.6648	52.7935	128.349	44.4566	9445.09	15.683	837.399	834.168	3602.96	962.204	1009.23	19797.4	0	442.481	64.9108	8.95745	20.54	50.4924	61.4154	2.737	109.146	5.67866	43.6522	0.361514	383.238	74.8927	278.566	55.2293	376.239	2.39873	296.291	0	768.481	14488.1	11.1318	0	TBI 48 hr -5
			TBI 48 hr -6	10.0785	174.675	0	30.8052	29.0708	34.9675	410.196	55.9501	9249.24	15.6742	859.4	1349.49	5128.33	1135.93	1242.12	19941.5	0	271.711	55.4401	7.75376	19.4848	61.1983	0	2.29873	96.5575	4.3458	32.9673	0.333502	419.818	90.6777	363.553	59.7185	419.398	8.65231	99.3542	0	247.92	13655.7	11.719	0	TBI 48 hr -6
			TBI 48 hr -7	12.9756	207.002	0	0	145.876	55.828	728.589	50.7112	13295.5	8.45703	711.987	1341.86	4491.32	1065.18	1477.78	14330.7	0	383.25	62.51	25.7924	17.4869	88.9471	0	3.17649	93.2869	3.69294	0	0.283121	335.47	44.7809	322.926	25.4849	747.495	25.5488	250.603	0	387.887	12537.4	11.9233	0	TBI 48 hr -7
			TBI 48 hr -8	9.84011	259.142	0	3.77804	41.5582	23.8	937.391	22.3198	7668.67	11.9011	603.374	1307.19	2514.35	759.579	687.985	34677.7	1.67115	174.825	45.646	12.3468	16.7364	0	0	0	34.1961	3.22264	0	0.32978	377.446	94.1758	289.388	36.7844	1742.03	3.48746	217.307	0	0	12376.9	12.2321	0	TBI 48 hr -8
			TBI 72 hr -1	5.84554	268.901	0	33.7346	81.0158	56.1215	941.974	57.7105	17566.6	8.78392	1025.31	2252.49	3571.32	1115.54	1282.81	50208.7	141.408	246.437	52.4321	31.961	16.6673	24.729	951.054	2.5137	72.4198	14.3738	64.4288	0.0727687	298.575	41.8718	259.041	157.828	1106.9	33.5627	583.492	58.6357	796.128	16312.7	18.0929	0	TBI 72 hr -1
			TBI 72 hr -2	12.4728	239.75	0	55.4126	9.54346	53.0583	557.196	16.0848	19011.5	9.29873	795.578	1861.14	3299.75	1284.52	1367.07	57940.8	86.3239	147.415	76.8097	0	21.2127	30.2696	392.913	4.63386	97.1913	10.3429	56.029	0.5442	323.341	35.3261	412.321	100.949	1723.53	57.513	411.741	29.4403	1317.51	15210.6	16.7643	0	TBI 72 hr -2
			TBI 72 hr -3	7.68236	164.264	0	27.4848	0	69.7534	935.074	28.6576	20261.9	17.9345	1041.73	2439.96	4927.34	844.848	1442.36	27422.2	49.8863	265.138	41.6149	0	6.76617	41.5601	771.254	3.48566	100.501	5.6601	44.5628	0.110473	248.3	10.8114	276.831	119.573	452.103	24.0257	326.101	1.49715	787.43	12792.4	11.9049	0	TBI 72 hr -3
			TBI 72 hr -4	7.27173	174.953	0	0	8.70638	53.238	508.082	28.6172	16519.6	9.80562	998.423	2306.3	3447.48	1233.84	1297.99	34429.9	0	214.978	36.2908	1.07242	20.2147	38.2938	655.088	4.55808	161.17	8.38205	21.6046	0.419321	959.008	13.0447	225.02	62.9107	404.206	28.3129	203.227	0	25.0448	13825.4	12.2246	0	TBI 72 hr -4
			TBI 72 hr -5	12.1585	209.36	0	0	48.8073	26.8599	19.8538	11.1542	8824.54	4.11662	541.742	1315.56	1367.48	835.64	736.091	19113.8	0	264.094	64.6123	1.41286	22.3561	27.6497	0	2.51971	119.713	4.86129	0	0.43013	83.5156	85.814	329.578	32.7419	189.858	1.17326	261.251	0	0	12515.2	11.0549	0	TBI 72 hr -5
			TBI 72 hr -6	10.9467	246.546	0	25.3227	35.724	43.6144	8.68003	37.5747	10507.4	16.1534	668.635	983.753	3029.9	858.689	1311.03	16831.5	0	316.188	39.8986	47.8918	28.1385	41.033	387.736	2.55589	64.5242	5.74871	0	0.110585	206.942	53.5763	261.14	52.1281	372.317	11.4157	370.46	0	90.6603	16198.4	14.4821	0	TBI 72 hr -6
			TBI 72 hr -7	11.7657	237.887	0	0	66.9019	51.1425	107.949	1.67452	12199.5	13.6747	745.482	1218.8	4347.69	1006.36	939.168	21079.5	0	324.728	75.2404	8.25055	25.4905	47.4254	0	1.58271	71.2594	3.95912	4.00807	0.289417	273.637	107.137	235.577	61.9095	437.771	6.73993	382.21	0	656.407	16195.4	11.1675	0	TBI 72 hr -7
			TBI 72 hr -8	11.8688	197.383	0	0	46.5126	31.2041	18.6283	0	9271.43	8.96029	650.772	1090.66	3355.31	967.903	892.148	20828.6	0	262.076	39.4283	0.269269	20.6718	0	0	3.03932	52.869	3.74985	24.2377	0.282483	201.695	63.816	329.995	34.1584	612.377	0.868148	213.137	0	0	14173	12.0634	0	TBI 72 hr -8
			TBI 72 hr -9	11.9088	173.382	0	61.1106	46.1317	35.9074	330.001	38.161	11166.7	5.7341	551.198	965.113	5111.14	1059.24	1253.22	14577	0	276.097	53.5105	12.1934	11.3508	49.6992	0	2.32016	85.3506	2.61228	4.68127	0.930778	265.104	68.9423	357.216	55.1589	748.434	20.5559	224.899	0	263.037	13526	10.8271	0	TBI 72 hr -9
			TBI 72 hr -10	11.0857	172.719	0	61.2386	0	38.2904	106.509	0	9313.01	31.4885	334.917	1108.95	3302.36	816.587	1109.44	13829.3	0	354.197	43.9571	2.75344	20.7839	65.6638	61.545	2.5846	65.6319	3.61586	22.7013	0.355337	308.532	71.4487	186.574	29.6733	421.183	1.07915	178.956	0	0	11900.5	10.5474	0	TBI 72 hr -10
			TBI 72 hr -11	10.8123	238.663	0	56.7813	116.732	54.4322	43.8446	30.2004	13847.6	10.4471	669.318	1232.79	5506.65	1228.28	1532.93	18966.8	0	342.676	65.4109	5.99077	20.7694	76.1077	0	5.16909	78.0485	7.55783	32.7662	0.35181	436.097	151.466	249.704	37.9274	819.112	13.6616	255.521	0	645.056	12496.7	13.0084	0	TBI 72 hr -11
			TBI 72 hr -12	10.8612	224.55	0	0	28.1616	37.2105	148.291	60.5517	11139.5	11.8623	756.906	1493.18	2963.03	1006.13	798.278	30745.4	0	147.933	50.4578	15.5012	20.2521	6.5953	0	3.6178	76.5585	3.28034	14.2285	0.280568	382.415	54.3672	259.197	35.0502	666.769	0	228.511	0	0	12553.8	11.7659	0	TBI 72 hr -12
			TBI 96 hr -1	13.2639	252.943	0	0	66.6662	23.5345	96.0436	68.2516	11358.6	13.3796	760.246	1327.21	3161.93	694.525	723.896	34190.8	0	633.296	64.4216	8.95017	15.8569	26.3574	0	2.80752	103.481	4.34226	17.4726	0.0295644	450.688	97.0747	464.986	40.6223	1253.77	14.5486	391.25	0	0	10963.2	12.1207	0	TBI 96 hr -1
			TBI 96 hr -2	12.15	208.194	0	0	58.7529	50.4291	237.205	7.05246	11743.2	6.1804	590.665	1137.73	5726.95	1099.39	1884.42	21038	13.9164	546.671	52.5656	14.6908	26.8053	155.227	557.384	4.40013	122.736	7.40163	65.1751	0	384.32	55.3346	526.293	72.4558	1033.56	32.9222	464.928	18.5102	1284.89	16832.4	19.1563	0.0786372	TBI 96 hr -2
			TBI 96 hr -3	10.3774	112.636	17.766	5.0764	82.1529	55.0798	78.1088	136.66	7921.73	28.257	562.875	1071.96	4797.02	903.598	1366.49	12958.3	33.0822	249.774	77.626	20.1414	38.2896	171.569	355.295	4.38431	88.6436	6.18254	104.999	0.765884	369.372	40.9033	288.074	108.574	721.226	15.9649	237.167	17.9507	1128.2	14310.4	14.0199	2.18306	TBI 96 hr -3
			TBI 96 hr -4	11.8917	132.612	0	0	32.156	47.8243	131.414	97.2721	9693.88	19.3021	539.462	775.172	4431.07	1069.55	1253.96	24995.8	44.1002	217.43	46.6076	8.22752	35.3376	124.847	231.459	3.79884	74.4066	4.28034	45.8372	0.884873	373.203	51.6328	346.653	96.9317	1113.23	19.2123	154.109	3.664	1066.93	14728.6	13.6628	2.59369	TBI 96 hr -4
			TBI 96 hr -5	12.0259	117.558	0	0	10.5368	43.978	66.8501	113.468	7735.68	15.175	389.646	1134.34	4994.57	638.772	1249.05	15010.6	38.5271	246.165	73.1567	19.4627	29.3513	127.28	201.702	2.99277	108.459	5.64725	38.7229	0.743309	142.92	51.0168	297.752	53.1252	217.23	11.4694	223.768	33.4617	1216.6	14893.5	13.4434	3.85896	TBI 96 hr -5
			TBI 96 hr -6	9.50017	130.998	0	0	0	36.6261	16.914	33.7951	7045.59	11.5922	397.179	1054.53	4070.03	612.95	796.497	24237.5	8.67685	223.048	57.1395	0.322855	24.0191	124.672	0	4.55114	129.708	3.45788	7.39831	0.317092	180.252	68.3218	346.985	70.8503	658.95	12.922	288.504	3.68556	96.3649	13792.9	13.9909	0	TBI 96 hr -6
			TBI 96 hr -7	10.4285	136.596	0	0	78.8829	48.5456	33.9936	58.8801	9700.08	10.7549	494.993	1027.26	4308.73	844.977	1253.64	20437.1	34.0361	213.614	78.3893	3.05068	31.457	118.635	208.639	3.51275	131.008	2.60414	34.0276	0.649977	276.478	64.881	231.204	37.8706	923.893	15.3068	240.96	9.00667	253.466	11545.9	14.3044	0	TBI 96 hr -7
			TBI 96 hr -8	9.51701	148.663	0	2.03686	0	50.9022	147.079	28.6732	8978.21	13.8955	326.364	1169.06	4284.02	871.175	1391.4	16728	48.4616	330.622	114.476	11.945	33.4525	183.133	245.003	3.83818	153.478	4.47782	81.4835	0.124548	279.472	62.9258	412.694	49.1453	675.402	25.6065	257.418	28.021	659.714	12549.3	16.1871	0	TBI 96 hr -8
			TBI day 7-1	9.46442	193.311	0	56.9929	9.49247	53.3418	9.36957	39.666	17450	7.02487	732.483	2055.61	4780.03	735.746	1117.28	29423.1	15.1602	386.485	56.2279	0.938778	18.23	18.5585	748.505	5.14957	109.748	8.54933	24.958	0.34182	296.461	8.20234	206.298	98.6209	296.518	14.8415	339.315	0.110463	243.929	16824.1	12.1426	0	TBI day 7-1
			TBI day 7-2	9.59966	224.993	0	39.05	0	39.9477	763.841	25.1924	14475.1	12.0836	730.677	2183.68	3608.17	534.602	870.696	43659.3	19.7427	432.845	48.2058	0	12.6318	0	188.419	3.63014	71.9639	4.97139	36.5249	0.391049	322.789	29.3036	294.447	58.1231	989.383	8.78372	252.517	0	158.114	12722.6	11.4991	0	TBI day 7-2
			TBI day 7-3	10.1745	211.852	0	0	0	41.4978	232.18	25.4882	14291.3	7.19314	902.328	3631.75	2525.96	756.172	719.557	40652.5	44.3231	135.127	113.03	4.39886	11.7916	1.23024	50.4542	1.01578	59.1251	5.0475	25.5181	0.37088	206.3	11.3415	297.187	63.0926	358.741	0	287.14	0.0277395	0	12431	11.2758	0	TBI day 7-3
			TBI day 7-4	11.1977	279.103	0	0	38.5766	45.5346	749.92	0	17124.1	8.21731	792.49	2033.15	1710.85	551.818	917.151	40233.5	0.0528855	364.359	51.4607	4.19035	17.5705	0	40.1497	2.29512	56.4347	5.3561	21.7321	0.13046	356.501	12.1929	543.773	80.5121	474.735	8.19315	264.023	0	590.178	13254.2	11.8533	0	TBI day 7-4
			TBI day 7-5	11.4632	152.758	0	0	49.7279	50.9848	18.3663	30.8258	10094.2	11.0046	661.508	1539.15	4394.01	1238.51	1241.94	21718.4	0	338.722	70.6534	0	20.1574	147.296	0	4.37019	131.01	4.77078	46.2063	1.37724	662.206	67.625	368.733	36.2892	912.281	34.4298	216.503	8.68789	286.415	14797	14.5316	0	TBI day 7-5
			TBI day 7-6	10.3488	139.166	0	0	29.0445	29.9615	50.2549	40.3047	8124.52	7.37633	336.965	1065.73	3526.24	822.134	918.756	16763.6	12.002	203.621	78.6633	3.39026	23.8888	134.078	0	2.54343	101.523	3.80386	0	0.618904	315.093	52.9851	357.552	51.5756	354.241	9.61651	174.402	0	313.19	12615.3	13.7112	0	TBI day 7-6
			TBI day 7-7	11.155	187.706	0	0	43.1004	34.821	124.126	30.4324	9714.5	6.28167	481.007	1352.36	4571.06	795.881	920.511	18731.9	17.1194	436.633	80.3342	0.190214	29.7391	66.1741	67.9012	1.40359	65.5	2.68955	14.9112	0.194177	211.829	84.6798	571.2	19.8427	1012.98	6.90949	326.392	2.2704	0	13589.7	15.3021	0	TBI day 7-7
			TBI day 7-8	9.51493	103.356	0	0	0.669493	22.6253	188.243	0	4656.71	13.3112	176.462	589.513	2261.2	614.583	140.187	19939.8	0	37.0458	40.5905	0	15.6335	8.29184	0	1.40869	0	3.01458	0	0.0143259	248.723	16.1018	988.732	29.7793	389.725	1.45646	27.4958	0	0	13285	11.493	0	TBI day 7-8
			TBI day 7-9	9.77822	146.744	0	103.673	27.8893	65.3792	115.099	0	9972.36	10.6181	501.782	1058.24	4918.67	1250.09	1394.73	16608.9	21.9279	530.588	106.989	8.12891	24.8468	142.583	234.308	3.18709	170.072	3.99307	19.7838	0.859106	232.993	60.3794	465.184	52.3402	527.776	26.152	273.883	24.0137	563.462	13107.2	14.5929	0.458632	TBI day 7-9
			TBI day 7-10	10.8128	162.928	0	79.0424	72.3347	57.4371	82.6072	29.3124	11171	10.6647	520.053	1131.72	3630.19	1042.67	1560.61	14976.3	29.598	308.395	64.6883	0	31.3093	185.191	335.511	5.15862	108.105	2.91381	1.30387	0.1263	258.291	49.1659	254.633	17.9509	767.219	11.996	115.18	23.0909	894.831	10983.1	16.5258	0	TBI day 7-10
			TBI day 7-11	11.257	213.916	0	68.7424	66.3066	57.8331	26.2278	78.2209	12611.6	4.02424	753.036	1319.32	6789.31	1507.95	1532.31	55821.6	42.9155	655.429	108.566	15.7756	21.1348	127.325	9.20077	4.27454	144.007	4.69655	39.2088	0	429.143	81.9388	456.588	80.9338	1720.45	25.9948	378.838	40.4273	1073.76	13515.1	20.1723	1.26551	TBI day 7-11
			TBI day 7-12	10.0826	162.042	0	0	99.1196	78.261	47.6973	26.0351	17994.3	13.8659	835.584	2027.68	6570.42	2578.89	1944.73	27556.9	61.7159	612.568	74.7956	41.6621	29.1555	111.487	632.22	1.71988	87.4465	7.46798	47.0951	0.590401	882.814	77.5682	373.639	101.423	1408.78	46.245	686.63	13.5981	1227.95	15434.2	16.1461	1.20149	TBI day 7-12
			TBI day 14-1	7.70447	250.276	0	0	90.0366	55.0387	119.468	0	24070.8	12.2769	1463.6	3105.48	3278.29	2323.17	1860.98	29634.2	56.2696	194.59	45.6552	0	9.47178	35.7489	58.4443	1.66385	83.3936	6.68707	25.4238	0	488.8	15.5778	189.404	73.7164	429.737	8.79952	418.189	2.86806	318.904	14044	12.6558	0	TBI day 14-1
			TBI day 14-2	9.91961	264.023	0	0	15.2652	34.7592	76.7056	0	16541.1	14.9532	878.781	2436.21	1948.4	991.9	1178.85	65779.5	11.9062	47.1103	41.4026	0.44387	24.1939	0	363.282	3.09637	48.9175	6.79093	31.863	0.2464	759.114	42.2997	157.854	89.1321	1316.07	8.67109	418.534	0	0	14881.6	12.6622	0	TBI day 14-2
			TBI day 14-3	11.5497	200.177	0	0	5.26496	37.6156	306.989	0	15207.2	10.6513	256.745	3589.83	2430.92	818.811	635.464	37816.1	0	119.871	41.7626	2.1343	8.14321	0	0	2.50957	14.2846	4.54216	0	0.120059	270.329	14.9572	142.485	59.1504	666.39	6.39988	291.736	0	99.7455	12780.3	10.4818	0	TBI day 14-3
			TBI day 14-4	8.35448	151.652	0	0	17.411	43.3117	130.842	0	14345.6	8.86891	512.589	1773.28	1573.4	400.027	498.149	36620.2	61.2684	174.817	47.8039	1.09085	10.2057	0	0	2.78112	32.8327	8.81554	19.3052	0.506025	461.171	13.0461	262.152	53.8346	741.971	0	287.602	0	0	13483.9	10.8397	0	TBI day 14-4
			TBI day 14-5	11.5929	96.7021	35.8563	0	37.2136	46.4337	17.4234	71.7434	8573.15	21.4967	544.656	967.264	4252.48	947.977	1118.62	14705.4	42.1424	211.179	44.7154	17.2675	22.7796	75.6276	317.869	4.14638	72.7321	4.5448	26.3635	0.815145	405.316	25.9268	160.686	54.3142	342.485	2.29407	126.319	0	517.221	14144.1	11.321	0	TBI day 14-5
			TBI day 14-6	11.6653	137.661	0	0	59.8394	63.6247	14.8057	66.8357	14584.1	19.2215	699.838	1127.9	4519.72	953.509	1571.79	22977.3	37.3827	335.829	63.1492	8.05024	30.7311	115.848	513.799	3.55087	108.172	5.42759	33.1792	0.588143	176.314	39.1153	250.447	59.8819	859.595	29.3909	369.562	1.71885	1287.49	14432.4	11.9011	3.28623	TBI day 14-6
			TBI day 14-7	11.602	112.874	0	0	10.1634	54.7926	265.787	47.0514	10243.9	14.5036	706.042	1622.6	5026.34	913.521	1223.78	18276	64.3597	144.022	55.0063	2.60295	22.4346	91.2137	278.662	4.53258	131.549	5.71831	26.0512	0.0945474	461.202	42.3016	348.138	71.0767	628.975	2.37316	211.774	9.98702	577.277	14779.4	14.2536	0	TBI day 14-7
			TBI day 14-8	11.6076	147.883	0	0	103.01	60.3658	64.1718	53.7738	13154.9	14.5731	637.771	1476.75	5924.05	858.98	1643.51	18017.9	45.5646	517.182	65.3753	26.6713	34.8589	110.955	445.205	4.6785	138.315	5.41798	67.8603	0.462613	465.506	59.3163	375.128	73.2866	577.63	33.5826	375.947	18.6097	789.44	19695.9	13.1902	0.401919	TBI day 14-8
			TBI day 14-9	9.21766	124.063	0	58.8436	71.5682	57.6642	78.4513	64.0007	13621	15.0459	536.086	1432.97	5629.76	1301.33	1298.37	14797.3	60.0225	177.366	44.8633	3.08412	28.1225	101.708	183.522	3.30126	119.694	4.40422	7.01995	0.323283	362.632	38.4153	256.016	80.887	689.659	7.67728	277.486	11.6548	572.644	15698.5	13.4052	0	TBI day 14-9
			TBI day 14-10	11.2107	160.203	0	32.9766	74.1652	57.9639	125.403	72.5691	12431.8	19.0994	553.9	900.314	5174.18	1273.66	1383.63	16174	40.2982	561.397	73.2058	14.9853	28.0494	131.551	361.54	3.93861	146.985	5.29876	22.7554	0.331115	429.904	69.7075	375.371	54.9279	605.909	20.1785	366.023	24.405	718.67	14888.9	12.4284	1.45545	TBI day 14-10
			TBI day 14-11	10.5138	155.438	0	0	100.844	50.9278	614.293	59.3091	13143.8	18.1104	871.261	1260.23	4660.19	1232.94	1440.57	16752.5	66.9863	234.568	65.976	0	28.0074	110.026	106.66	2.95455	108.801	3.7413	14.2267	0.340856	322.52	31.0573	229.729	45.7293	518.189	21.8462	328.677	14.0594	252.741	14332.5	12.4866	0	TBI day 14-11
			TBI day 14-12	11.0562	173.102	0	0	31.9015	54.2908	358.346	28.9593	14468.6	15.8393	462.605	1106.84	5486.78	1201.7	1448.04	15632.4	31.4406	524.488	48.1676	3.98262	15.8269	130.129	898.329	4.21908	135.374	6.26665	32.8921	0.462082	469.64	42.1875	351.172	59.5833	695.332	19.8547	163.446	2.9383	753.874	16493.8	11.7315	2.44976	TBI day 14-12
			TBI day 30-1	9.19032	243.489	0	54.4405	16.9665	50.9629	2226.43	21.358	14185.3	12.0397	572.025	2978.3	3946.41	1985.69	739.913	38584.6	21.0825	238.398	43.7164	12.539	15.992	0	0	2.27934	76.8188	5.51272	12.059	0.117758	208.841	19.5941	232.663	79.2761	649.229	4.4952	272.719	0.596488	0	18132.4	13.0496	0	TBI day 30-1
			TBI day 30-2	9.34058	151.499	0	0	0	87.8765	526.857	39.3935	22776.6	10.4796	752.615	1796.21	4426.96	1069.12	1572.5	18025.1	19.2523	128.297	45.3526	0	13.5299	58.7829	422.229	2.05243	96.5276	6.08558	8.99341	0.198058	364.011	9.93832	227.707	89.0336	613.79	33.1438	235.307	26.2367	383.712	13088.5	12.0715	0	TBI day 30-2
			TBI day 30-3	8.20222	205.523	0	0	10.3395	50.5879	427.064	0	15983.6	21.204	700.966	1409.6	4869.73	1828.72	1635.78	28635.1	2.64704	489.37	56.3301	11.1329	18.1959	25.7104	83.101	1.37427	63.9489	6.10793	31.3638	0.0131047	199.619	33.5697	293.964	133.165	1179.03	66.3862	651.64	34.3442	1320.69	19245	14.2884	0	TBI day 30-3
			TBI day 30-4	11.5735	233.169	0	58.0734	75.4112	72.2762	533.608	27.3413	20160.5	14.2827	685.535	1680.46	3866.36	881.338	1711.52	21238.2	50.6172	373.611	69.6835	11.2317	15.2622	36.0321	277.822	4.38313	133.073	6.76368	72.1552	0.287784	305.386	16.7881	442.59	79.1924	962.518	69.4827	435.494	22.5502	986.853	16043.4	15.6235	0	TBI day 30-4
			CYT-5 antibody array
			LOD	6.33576	2.05072	3.55416	0.855125	4.11912	3.61173	3.81757	20.1329	26.2418	222.829	0.543487	7.78431	18.0017	1.25702	0.417841	13.4377	111.458	7.01581	693.051	13.4371	8.90474	237.819	1.62969	7.70997	1.42658	1.39448	8.15407	51.3694	8.82939	1.40397	7.59357	5.13882	0.381006	194.416	0.416425	3.60145	4.30555	0.531396	1.01857	3.77349	LOD
			MAX	5000	10000	2000	1000	1000	10000	20000	10000	10000	4000	2000	4000	10000	2000	500	10000	4000	10000	10000	1000	20000	100000	4000	20000	2000	100000	20000	4000	1000	2000	10000	10000	1000	20000	4000	4000	2000	500	2000	1000	MAX
			Protein name	bFGF	BLC	CD30L	Eotaxin	Eotaxin-2	Fas L	G-CSF	GM-CSF	ICAM-1	IFNg	IL-1a	IL-1b	IL-2	IL-3	IL-4	IL-5	IL-6	IL-7	IL-10	IL-12p40	IL-13	IL-15	IL-17	IL-21	KC	Leptin	LIX	MCP-1	MCP-5	MCSF	MIG	MIP-1a	MIP-1g	PF4	RANTES	TARC	TCA-3	TNF RI	TNF RII	TNFa	Protein name
			sham -1	169.149	154.803	255.227	25.2819	142.822	410.492	726.315	37.2019	1683.04	570.274	7.78173	38.2712	1112.54	2.8177	3.06618	57.7622	878.157	264.291	2210.78	334.041	259.064	8925.37	6.6771	9572.26	0	190.647	70.7131	3417.21	853.959	4.78065	800.693	17.1443	61.0193	48928.4	21.9596	0	55.1177	50.2326	30.4863	0	sham -1
			sham -2	187.915	117.342	322.955	3.04683	77.6135	580.506	667.85	9.26409	1747.7	105.368	8.57691	9.56601	287.912	0	1.25055	14.1675	143.792	217.436	985.164	30.2358	159.611	6756.08	2.37102	4838.61	0	115.069	88.178	0	149.082	5.69904	715.599	19.486	67.4638	53984.9	9.80372	0	29.0344	68.0754	50.4353	0	sham -2
			sham -3	108.779	126.154	78.9646	2.53747	81.3921	839.099	806.064	1.76312	1029.07	0	11.3454	1.9267	166.036	0	0.901986	1.77288	28.8869	37.24	700.663	32.9121	35.4731	5406.86	0.5241	8382.04	0	3.15498	71.6452	0	0	4.55142	686.404	8.56683	60.6984	30567.7	3.84141	0	45.5151	40.8199	3.51373	0	sham -3
			sham -4	99.7963	163.749	363.672	3.33715	51.075	711.029	76.0425	0	1258.3	0	5.63956	10.2601	368.964	0	1.39448	17.5874	0	238.545	1116.26	27.1132	412.582	6513.59	2.43452	2193.12	61.3025	92.1401	61.2432	0	556.758	4.886	1090.77	173.851	71.4326	49805.4	12.903	15.0223	30.3568	57.321	29.7069	0	sham -4
			sham -5	134.587	144.176	633.778	4.72885	174.534	956.838	658.001	8.5018	2368.39	119.904	15.3372	1.89365	214.274	0	1.03452	0	364.754	290.73	791.816	6.98026	366.5	3376.94	1.23447	0	0	42.3965	79.5792	0	949.58	6.25658	903.637	145.582	87.1985	86207.2	5.13147	0	24.166	79.8564	5.07506	0	sham -5
			sham -6	88.2547	195.129	771.442	3.2407	123.029	569.452	759.208	0	1820.57	0	12.8107	2.39761	481.211	0.0375601	0.507809	0	0	229.145	736.346	41.8152	407.324	4414.17	1.48414	9760.28	199.869	37.0395	50.8948	0	739.794	4.83779	1243.65	277.938	57.2475	47910.4	10.2878	0	18.9181	69.4246	14.4542	0	sham -6
			sham -7	193.573	125.417	189.372	6.7049	78.9853	380.21	68.0601	14.4451	1087.55	305.509	8.54979	7.88597	374.855	0.565392	1.44865	17.7237	583.814	755.032	1208	95.5151	709.515	7755.29	3.69504	4128.06	8.80884	120.17	70.7861	0	558.609	5.46243	761.503	23.1629	64.7888	67023.1	9.00071	0	43.5222	55.7768	17.5797	0	sham -7
			sham -8	208.839	139.269	302.787	9.80742	93.7845	379.784	390.38	10.1059	1049.18	306.268	6.95963	24.0039	725.339	1.01072	1.81729	25.4217	653.661	442.085	1504.63	143.786	508.578	7698.02	4.61362	8732.77	89.8976	85.4059	85.4793	0	418.172	5.25299	841.497	50.9876	79.999	59527.7	11.9946	0	33.3733	59.4727	31.7115	0	sham -8
			sham -9	195.348	127.668	96.6176	28.3188	79.9631	324.298	0	30.1694	2042.62	506.171	12.438	34.7302	898.821	3.26428	2.64559	52.7785	1014.07	834.907	2097.52	307.447	213.824	9230.87	5.28762	5997.79	78.1763	154.182	76.561	591.73	332.67	5.57904	649.394	9.98383	35.2063	66773.5	15.3766	123.898	53.8279	48.4935	16.9879	0	sham -9
			sham -10	220.657	119.927	237.083	11.9814	64.1971	295.973	698.687	15.2078	2471.83	188.828	10.4538	16.7042	728.771	0.910429	2.04222	28.7137	692.156	625.233	1836.02	120.734	895.648	8385.98	5.0039	15517.6	36.4028	148.931	103.327	542.375	377.395	5.02451	616.729	38.7668	103.474	68116.5	19.928	170.328	40.2983	69.6966	41.4148	3.1048	sham -10
			sham -11	181.871	140.537	309.664	34.5787	28.617	408.813	1790.77	42.5679	1544.99	619.493	11.3679	24.0265	451.949	1.7734	3.16298	53.7515	629.436	1010.7	2120.71	348.92	648.606	8857.56	5.37593	17462.3	0	87.7993	65.1716	2908.34	938.022	3.91253	960.217	54.4537	74.352	36760.2	8.88123	0	46.2452	42.0227	33.0104	0	sham -11
			sham -12	169.875	200.03	367.967	39.4104	72.6973	475.709	2050.86	58.5448	1926.18	611.09	13.3435	22.3097	496.946	1.8179	3.05274	36.7125	679.151	900.798	2038.21	250.602	1154.82	11134	7.54465	48310	0	151.509	72.0399	9067.93	682.955	4.27654	1037.86	46.2748	48.7753	40451.5	11.4416	2600.11	54.0381	47.0794	33.8126	0.0403495	sham -12
			sham -13	173.282	159.03	475.225	28.7267	20.7341	95.3764	3031.74	21.8416	1745.56	512.81	11.0245	28.4376	438.41	1.09959	2.23791	45.3059	504.942	163.393	2022.71	204.228	192.102	8331.13	4.46438	14598.9	0	96.4056	57.4014	1502.01	717.314	4.53164	843.945	169.411	29.1665	35397.6	7.03731	0	47.6209	39.878	43.6545	0	sham -13
			sham -14	167.755	192.42	552.119	33.4957	54.8408	668.434	4990.35	34.6124	2509.36	459.727	23.2318	36.9618	640.411	1.95541	2.40103	45.8501	781.597	362.447	1956.95	184.135	1980.82	7477.34	5.49136	37009.7	0	136.487	80.7022	2665.51	368.492	4.857	1284.9	249.288	97.3954	40505	7.44441	0	45.7875	50.3132	57.3942	0	sham -14
			sham -15	141.797	130.942	216.613	16.8334	17.984	149.314	568.495	21.7277	1134.89	369.954	8.84659	37.8978	589.908	0.123561	2.19013	31.3165	353.905	1.09795	1427.32	89.115	222.709	5984.2	3.36455	0	0	21.9871	66.7993	0	249.62	3.62224	660.871	82.9262	32.4333	31181.2	2.99437	0	35.7227	36.67	38.2812	0	sham -15
			sham -16	144.241	142.666	316.092	24.5289	13.7961	310.151	615.419	34.0914	2010.66	469.632	17.3439	38.1064	848.975	2.01698	2.21538	40.3449	561.286	83.6861	1662.02	162.617	566.252	5979.89	4.59298	19681.9	0	121.786	135.164	0	671.483	9.41405	764.748	93.6762	48.2179	22571.2	9.25058	0	41.4989	39.2608	53.9519	0	sham -16
			sham -17	151.964	129.7	362.271	27.7868	63.653	160.355	1677.7	32.1092	1762.15	455.849	7.6858	29.3174	518.558	0.87443	2.25187	48.8702	385.498	251.99	1829.46	167.757	393.078	6774.79	3.5182	24500.6	0	64.2843	74.7331	1789.83	756.7	5.75518	740.156	100.167	86.6286	67356.6	4.85386	0	38.2998	49.584	54.714	0	sham -17
			sham -18	208.645	138.286	270.359	25.2172	29.8843	452.907	958.644	28.4744	2640.03	565.451	17.4621	32.8508	396.697	2.30782	2.68883	44.2031	532.103	496.424	1807.55	189.43	242.607	6281.26	4.46232	11796.4	0	150.97	70.0877	0	47.9513	5.50413	839.874	62.8875	103.947	34292.7	9.03274	0	32.7632	61.0376	52.1064	0	sham -18
			TBI 8 hr -1	180.248	98.4306	62.9287	8.73704	143.101	249.044	64.3888	22.4002	2646.28	386.365	8.3558	26.9287	1090.08	1.48043	1.92754	32.8904	565.78	455.387	1384.78	103.684	291.18	7968.79	4.19277	0	156.51	128.118	100.475	2363.85	496.162	6.43119	365.412	4.98752	196.595	31495.2	7.07349	0	46.1419	61.8185	32.3658	0	TBI 8 hr -1
			TBI 8 hr -2	202.621	80.4029	58.8711	7.17571	128.928	241.286	760.849	12.9872	2402.78	240.017	12.1744	17.9762	778.531	0.830377	1.84216	24.1904	740.511	375.763	1440.53	122.469	337.348	6618.55	2.82749	8938.71	175.722	147.617	122.609	2222.21	262.448	7.31006	253.393	9.4164	52.5119	49852.1	16.7642	108.404	33.4345	65.1602	46.1172	0	TBI 8 hr -2
			TBI 8 hr -3	159.342	126.835	142.552	18.3384	89.496	329.162	59.468	25.2333	1640.41	349.235	8.88359	27.406	1111.64	1.30573	1.79859	41.0355	465.125	183.025	1588.9	137.952	351.813	7461.62	3.72873	4837.15	0	162.306	93.2818	1203.69	0	5.09493	311.504	18.7582	94.3336	46859.3	7.70429	0	34.2754	45.4941	21.4042	0	TBI 8 hr -3
			TBI 8 hr -4	161.797	143.022	564.67	10.3714	85.0909	451.281	814.595	19.5628	2004.71	189.599	10.143	17.8008	991.138	1.15285	1.58418	27.197	460.149	386.014	1396.02	100.958	193.167	5322.29	2.51756	2023.71	229.75	76.0046	107.711	0	923.079	7.27564	673.794	74.1724	110.707	37905.1	13.6147	0	26.2209	56.7046	38.9267	0	TBI 8 hr -4
			TBI 8 hr -5	213.891	186.792	739.084	42.913	46.2558	586.965	3096.14	33.8219	1895.96	601.611	11.777	25.1467	418.127	0.940741	2.58211	47.3519	269.498	937.167	2132.47	154.792	601.862	7549.74	3.95784	36268.3	0	136.03	73.7291	2293.16	764.136	5.45277	1171.69	149.867	88.9851	64541.5	3.21186	0	36.136	48.4927	36.4668	0	TBI 8 hr -5
			TBI 8 hr -6	184.09	123.513	200.703	13.8089	95.0207	310.894	499.071	44.9381	2863.69	480.1	15.7182	32.4658	430.84	2.47002	3.11438	36.1763	689.283	1296.51	2087.11	337.365	835.443	7654.45	7.16967	23063.7	0	201.17	77.4302	3333.27	732.298	7.08638	764.961	23.0818	50.4212	55023.1	5.90439	0	46.595	55.4844	42.8084	0	TBI 8 hr -6
			TBI 8 hr -7	210.247	126.895	488.876	32.6671	71.2578	453.093	977.136	44.5257	1394.77	825.676	14.11	37.4932	517.291	1.95774	3.34258	65.7173	388.41	896.132	2280.91	227.869	703.008	9120.35	4.65991	0	0	110.511	36.1979	2529.14	955.727	4.43536	869.282	67.1485	81.6648	43775.5	4.29686	0	38.7129	38.205	30.7186	0	TBI 8 hr -7
			TBI 8 hr -8	171.85	170.799	593.036	22.6734	132.346	271.019	1300.75	37.3181	2272.35	486.383	12.5869	26.9675	664.321	1.09135	2.32701	44.4993	608.244	463.605	1577.6	241.311	950.967	7122.6	4.58505	23307.3	0	113.345	88.7779	300.154	372.482	4.09092	1228.99	241.954	58.577	46626.9	12.3297	0	44.7749	47.3505	55.2194	0	TBI 8 hr -8
			TBI 8 hr -9	241.184	118.35	400.235	38.526	251.816	247.376	1608.81	61.076	2804.25	713.432	16.202	36.9265	510.81	2.22731	3.60983	55.2192	863.481	398.068	1996.86	370.115	813.233	6308.82	5.47849	0	0	97.3335	70.5753	7063.22	3092	6.22432	883.42	72.7655	118.805	35927.7	1.98818	0	36.9047	69.3031	47.4124	8.27202	TBI 8 hr -9
			TBI 8 hr -10	187.067	156.737	167.428	27.4748	122.373	304.267	0	53.2229	1526.95	482.608	12.2034	26.6736	467.594	1.95491	1.70338	31.2098	397.171	311.982	1949.12	349.851	767.069	6706.35	5.46024	6279.29	0	143.267	60.503	2445.25	137.816	4.24441	670.49	44.2019	109.329	50798.1	4.98306	0	30.6565	43.486	43.9699	0	TBI 8 hr -10
			TBI 8 hr -11	197.773	143.488	387.426	30.835	157.75	250.83	1132.22	40.4287	2035.55	668.264	11.0502	27.5045	695.376	2.12019	3.06743	41.3528	555.671	565.877	1928.37	195.196	228.351	8795.01	6.03105	19158.2	0	86.883	56.8666	2161.77	280.733	3.14667	1024.92	8.09397	51.2885	32858.6	0.522368	1100.61	54.961	57.6015	60.4416	0	TBI 8 hr -11
			TBI 8 hr -12	209.013	103.491	265.027	7.674	90.0486	99.4793	411.282	8.42677	1925.75	12.1934	6.50043	18.8779	303.53	0	1.96836	4.45974	152.181	93.2663	981.023	18.0371	253.466	4290.61	2.26511	0	0	13.1664	105.904	0	0	7.96595	793.609	27.4335	174.116	37071	4.18762	0	24.5443	80.5005	102.58	0	TBI 8 hr -12
			TBI 24 hr -1	140.711	74.883	154.669	4.18736	70.2132	463.166	0	2.51093	2181.21	61.7454	11.1926	4.89458	533.165	0	0.905882	10.4074	260.374	172.149	913.324	10.024	165.89	7122.68	1.15034	0	0	8.40479	61.5925	0	155.416	5.9117	686.625	0	51.7425	39870.3	2.99832	0	36.6193	35.7603	15.871	0	TBI 24 hr -1
			TBI 24 hr -2	128.521	119.247	427.813	4.20149	131.13	235.408	0	16.6447	2242.52	149.293	10.9131	15.454	1163.61	0.346227	1.19101	19.9779	424.658	73.7596	1258.35	41.0238	241.644	5255.73	2.39405	0	159.618	174.385	114.876	0	0	7.57968	844.702	58.2738	105.131	50377.3	11.5725	0	24.8399	57.4273	32.5054	0	TBI 24 hr -2
			TBI 24 hr -3	170.771	90.1959	348.693	4.7806	56.4026	542.445	0	0	1199.96	0	6.52351	3.89271	627.383	0.447286	0.947596	0	441.084	33.3232	769.439	16.3916	74.8364	3354.8	1.48477	0	0	54.6745	78.7121	0	217.981	5.04018	757.602	14.9986	69.8408	30387.6	5.82447	0	23.695	40.5389	12.0963	0	TBI 24 hr -3
			TBI 24 hr -4	175.038	94.4832	112.44	5.0113	87.9517	305.952	277.466	5.84557	2070.2	85.423	6.93873	12.4375	486.406	0.197061	1.48826	14.1206	326.482	500.003	1139.27	34.3181	507.764	5469	1.94706	371.767	0	43.3395	92.2609	0	1385.59	7.30796	559.248	45.0618	78.9271	42408.7	8.65436	0	23.0153	58.0178	37.2864	0	TBI 24 hr -4
			TBI 24 hr -5	221.599	95.8085	174.999	10.5921	109.547	100.39	284.409	1.59858	1383.16	0	8.13206	16.077	254.823	0	1.55393	4.01344	110.165	23.134	788.022	21.6168	85.3722	4614.97	1.62051	0	0	15.2464	75.6862	0	0	5.73927	723.14	30.1622	97.8737	31233.6	0.019254	0	21.9132	58.3166	39.2284	0	TBI 24 hr -5
			TBI 24 hr -6	216.255	128.65	146.749	14.241	75.8394	139.959	0	19.2567	2516.23	320.4	8.68206	28.3068	1087.78	0.658701	1.78857	35.0933	468.49	76.3922	1647.68	38.7185	0	4830.88	3.87208	0	0	106.208	80.0007	0	714.033	7.14636	836.96	50.7792	131.379	30299.7	0	0	32.1454	74.6958	58.2955	0	TBI 24 hr -6
			TBI 24 hr -7	233.451	111.588	38.666	15.0922	102.758	131.731	265.623	12.3692	1888.55	105.922	9.53961	21.7799	450.374	0.131992	1.6051	15.406	263.653	384.593	1134.12	28.2987	40.9276	5004.76	2.25293	264.979	0	88.7407	69.8472	0	77.6974	4.37078	601.658	21.9099	82.0032	39798.1	11.4979	0	26.2227	67.2057	66.6277	0	TBI 24 hr -7
			TBI 24 hr -8	204.054	111.746	133.284	12.9095	16.7244	242.782	249.922	23.9054	2259.97	273.098	15.2512	18.389	770.645	0.309506	1.49671	13.8578	465.447	338.718	1320.37	57.6842	0	4823.94	2.17304	0	0	59.7401	87.0246	0	101.359	5.76371	543.422	21.6099	104.001	48795.1	7.04525	957.062	38.2614	52.7876	61.0179	0	TBI 24 hr -8
			TBI 24 hr -9	185.694	113.42	147.675	22.3747	80.2424	203.405	12.9186	33.8151	1691.27	338.89	10.6556	19.8963	553.199	0.368826	2.32028	27.996	334.398	206.074	1608.64	148.563	228.002	7468.93	3.88765	9640.48	0	61.4682	96.4748	0	202.563	6.19528	698.777	28.8892	54.0117	39226.1	7.5306	0	29.7355	44.2528	38.8516	0	TBI 24 hr -9
			TBI 24 hr -10	178.344	128.387	204.216	17.5387	43.741	149.66	744.286	23.8269	2552.75	192.377	14.1124	24.1749	636.786	0.907737	1.85498	19.3572	266.286	165.094	1317.17	86.9587	245.251	5373.56	3.25749	0	0	26.4654	78.5912	0	0	4.85798	564.018	32.7123	49.5424	64429.6	2.98482	0	32.5893	50.3588	51.3404	0	TBI 24 hr -10
			TBI 24 hr -11	243.446	93.6464	249.677	9.73322	66.1078	119.77	400.12	0.289369	1958.29	137.695	5.49415	11.6885	463.322	0	1.1861	0	0	147.419	717.934	0	0	4571.36	1.05548	0	0	3.20652	66.6996	0	0	4.70852	737.238	19.0466	67.2787	33550.3	0	0	20.377	65.0399	54.9266	0	TBI 24 hr -11
			TBI 24 hr -12	268.163	85.4775	142.957	9.39092	100.215	84.0703	0	0	1965.92	0	6.98004	9.40114	453.718	0	1.69605	0	46.4614	0	697.982	1.14839	0	3162.97	1.17718	0	0	0	65.2527	0	0	5.46398	703.293	16.5692	61.3161	35499.2	0	0	19.3597	72.8282	58.3681	0	TBI 24 hr -12
			TBI 48 hr -1	239.406	131.541	419.248	17.2683	41.4951	201.339	1940.71	0	2508.34	225.349	6.09488	15.9435	588.654	0.0280557	1.33971	3.45913	266.068	0	1265.95	0.740546	0	4513.91	2.586	0	0	0	36.9954	0	0	2.0011	962.63	79.4434	86.3284	38815.9	0	0	25.1678	65.9944	50.197	0	TBI 48 hr -1
			TBI 48 hr -2	235.497	93.4492	257.381	8.85113	49.9749	151.246	282.945	0	1909.76	0	10.6476	7.7557	332.653	0	0.845358	0	97.2868	24.9632	786.812	6.94109	180.389	3867.5	1.08806	0	0	24.4573	52.3891	0	0	5.18708	668.827	35.4557	52.2681	46531	0	1613.27	23.329	66.5265	61.5342	0	TBI 48 hr -2
			TBI 48 hr -3	264.597	129.247	349.759	12.3295	62.2384	120.455	759.518	0	2060.75	58.5394	7.72128	9.71303	384.842	0	1.1822	0	306.805	0	940.938	0.881517	0	3522.59	1.78102	1586.57	0	2.97168	57.0123	0	0	4.10788	772.393	110.301	67.9463	26683.1	0	0	12.5638	59.7425	46.1763	0.0183038	TBI 48 hr -3
			TBI 48 hr -4	194.087	126.307	525.595	6.34692	113.341	39.1767	0	0	1553.58	0	4.91991	11.0403	603.705	0	1.08747	0	0	0	940.325	0	0	2965.05	2.14747	0	0	0	60.2326	0	320.586	3.25776	810.034	91.0153	107.917	33429.7	0	0	13.5939	60.6164	42.3211	0	TBI 48 hr -4
			TBI 48 hr -5	168.465	114.785	346.211	15.1271	37.6385	162.755	1668.57	24.1035	1572.92	302.771	5.30279	26.7146	322.622	0.913734	2.04222	28.6305	566.569	362.82	1663.67	110.189	538.082	7170.62	4.78822	14824.4	0	95.4567	93.7101	253.62	0	3.97597	966.315	48.9345	34.3201	47971.4	5.15431	0	31.7824	49.8671	47.3939	0	TBI 48 hr -5
			TBI 48 hr -6	214.848	145.345	303.936	31.3868	71.1265	162.896	19.9471	36.5756	2216.47	456.434	11.0473	40.5481	709.391	2.10516	3.34246	37.9406	767.027	445.709	1847.62	182.735	0	6456.71	6.15106	15640.9	0	127.368	88.8987	403.149	0	4.94923	747.867	91.3008	72.6193	46676.7	6.59394	0	32.8279	59.8507	38.7568	0	TBI 48 hr -6
			TBI 48 hr -7	192.581	152.031	401.73	27.0734	39.2066	262.981	250.684	29.1503	1395.35	568.263	7.43778	29.8644	554.785	2.0165	2.38256	42.0525	595.342	292.57	1816.95	231.873	155.312	9451.57	5.23337	13200.8	0	103.223	68.7011	1444.78	69.6909	6.62659	903.52	119.124	82.083	28120.8	5.92013	0	31.8234	55.5743	49.0444	0	TBI 48 hr -7
			TBI 48 hr -8	237.024	98.2993	187.433	13.0716	101.84	87.1689	0	0	2547.97	0	14.096	8.90626	825.728	0	0.790357	0	233.597	0	534.86	0	0	2707.83	1.79899	0	0	26.9332	55.7271	0	693.987	3.77047	513.21	36.1825	74.3117	74557.4	0	0	13.3214	76.3149	54.9226	0	TBI 48 hr -8
			TBI 72 hr -1	174.41	181.642	439.972	7.45143	196.691	877.032	176.061	24.2888	2220.7	119.133	9.56383	15.4558	968.348	1.235	0.973426	40.8925	471.617	0	1384.77	85.9606	0	5464.99	3.33194	0	0	55.4381	39.5982	0	0	1.39441	792.841	7.85597	53.4966	38946.3	6.53472	0	21.1862	18.3125	24.8248	0	TBI 72 hr -1
			TBI 72 hr -2	167.206	105.035	35.0599	7.94119	81.064	320.534	140.756	12.7903	1766.32	248.68	7.46595	13.0536	518.693	0.46208	1.87232	24.4722	108.544	329.305	1315.45	62.7734	572.596	5474.32	4.66377	0	0	148.975	97.7324	0	239.522	6.28472	752	9.71924	119.319	64818	2.93869	0	23.1389	74.227	60.2831	0	TBI 72 hr -2
			TBI 72 hr -3	156.435	130.489	176.474	19.9514	62.0845	338.905	0	24.6428	1509.01	376.195	6.5279	25.511	645.832	1.73321	2.2517	39.9911	713.241	549.09	1741.56	191.397	884.97	9168.51	6.203	0	0	160.869	96.8779	465.704	416.355	5.91238	216.557	34.6416	148.547	52380.1	9.04365	1940.21	30.4599	78.9151	81.3231	0	TBI 72 hr -3
			TBI 72 hr -4	174.591	93.8975	82.6013	7.39071	58.0246	248.018	51.774	26.4493	1370.03	241.724	5.77515	20.4131	492.101	0.349281	1.57718	24.9764	273.739	345.868	1289.24	144.362	366.815	6891.15	3.72597	3779.41	0	148.656	107.304	1364.01	167.78	6.86061	275.802	8.72344	72.303	52607.9	6.38211	0	31.6916	63.3412	40.8563	0	TBI 72 hr -4
			TBI 72 hr -5	208.425	126.213	538.396	12.0998	25.3378	248.139	0	5.45679	1967.56	0	10.4685	15.737	351.061	0.26566	1.66262	1.60337	87.1952	0	779.819	0	0	4903.56	0.861061	0	0	0	48.5227	0	0	3.29624	838.893	104.885	30.7388	21823.7	0	0	19.9018	66.1509	41.1081	0	TBI 72 hr -5
			TBI 72 hr -6	201.162	137.724	439.169	23.9179	26.5702	280.306	36.7425	13.1741	2046	244.794	12.7298	15.5382	575.533	0.606834	2.43982	32.9753	371.172	319.058	1207.88	115.996	149.458	7042.5	3.09362	208.908	0	98.3373	94.0256	1284.78	139.28	6.67453	1079.16	90.9547	61.7198	41720.5	14.0234	0	35.6208	65.6288	65.3687	0	TBI 72 hr -6
			TBI 72 hr -7	214.932	135.198	416.384	22.1711	0	187.985	0	14.9414	2435.09	277.362	6.38034	19.4556	1040.01	0.461532	1.73863	16.0804	184.952	29.2803	1206.59	53.1234	0	6141.12	2.80394	0	0	15.4278	76.865	0	869.474	4.27948	695.339	98.7152	65.1463	33259.2	0	0	22.1319	50.7359	44.372	0	TBI 72 hr -7
			TBI 72 hr -8	189.456	150.054	232.825	20.442	23.3814	180.894	0	21.6527	2025.69	289.64	13.0134	17.1426	770.531	0.565506	1.87088	20.1361	390.425	38.0258	1476.09	86.2019	0	6018.83	3.27479	0	0	115.111	77.4576	0	0	3.8551	813.58	106.234	51.375	39498	1.07472	0	20.5116	51.2991	50.7064	0	TBI 72 hr -8
			TBI 72 hr -9	185.56	128.478	320.322	22.6273	24.3812	261.983	0	15.695	1653.13	516.215	11.3086	22.1648	735.809	1.20319	2.10289	37.8381	210.238	0	1681.68	158.451	273.84	7886.39	4.96244	0	0	77.8538	76.454	769.267	0	5.21536	653.78	58.1149	52.2762	52383.9	1.81767	0	34.2404	39.3569	41.0826	0	TBI 72 hr -9
			TBI 72 hr -10	139.774	140.978	440.878	31.7051	20.4438	282.668	0	35.2942	1328.69	666.656	11.1904	40.3134	761.241	2.58414	2.37516	35.3462	689.477	403.553	1861.91	263.373	0	7692.17	4.8558	10415.5	0	72.0531	85.897	2124.53	105.428	5.91136	801.239	103.859	49.374	34852.9	0.470242	0	33.2295	40.017	50.423	0	TBI 72 hr -10
			TBI 72 hr -11	206.928	104.288	109.387	20.1064	3.57256	247.456	0	8.53851	2481.5	378.183	7.24602	20.5804	443.704	0.929048	2.11734	25.4139	405.891	159.371	1381.97	164.916	0	6722.35	4.33502	0	0	24.1707	45.2795	1150.41	0	4.46459	517.562	54.0575	119.643	50889.7	4.88007	0	30.479	51.9423	42.7708	0	TBI 72 hr -11
			TBI 72 hr -12	185.698	113.798	138.324	12.7653	19.3505	97.0379	0	0.800141	2057.07	0	3.65465	24.0945	584.254	0	1.35882	7.67872	292.69	0	1244.53	2.5769	0	4385.96	2.84389	0	0	38.5438	47.9438	0	0	3.91426	635.169	59.9164	85.54	45566.8	0.0644161	0	16.43	61.1915	41.9868	0	TBI 72 hr -12
			TBI 96 hr -1	202.93	124.811	219.695	18.9546	123.174	61.9679	0	25.8842	1772.71	0	8.19755	19.1134	574.795	0	2.05374	4.22361	271.381	0	1353.11	32.9594	0	3315.86	2.23828	0	0	0	70.7825	0	0	3.9981	511.712	37.3827	37.9161	41279.7	0	0	20.8224	55.729	49.1958	0	TBI 96 hr -1
			TBI 96 hr -2	176.383	140.85	200.422	29.1354	48.528	229.957	0	45.2485	1585.88	474.181	8.05116	25.2874	626.403	2.96264	2.32795	39.4723	754.632	45.033	2051.97	413.325	233.392	6805.28	7.62014	1331.69	0	69.4921	70.6897	2359.59	0	4.1016	506.116	36.3155	42.6887	47741.5	0	0	32.9198	49.5992	38.5627	3.99828	TBI 96 hr -2
			TBI 96 hr -3	237.454	119.354	293.592	24.2657	18.9907	162.082	140.38	27.8072	1173.75	522.647	4.56654	33.1421	418.605	1.26963	3.11912	45.9499	597.477	520.565	1766.55	202.387	0	8238.46	3.36697	0	0	43.7563	67.64	2624.94	288.013	3.43698	783.4	32.2747	41.3804	42449.6	8.69465	0	29.2967	48.3499	46.9756	0	TBI 96 hr -3
			TBI 96 hr -4	229.895	134.741	171.779	20.5916	18.307	215.287	524.922	28.6719	1761.77	329.782	8.22949	24.8279	572.965	0.81156	2.69142	37.7711	449.313	376.153	1742.32	189.62	741.474	6757.7	3.85572	7604.73	0	102.15	75.7195	2627	295.049	3.7313	384.544	62.7831	53.8337	55394.2	0.813622	0	34.5075	51.9312	38.3709	0	TBI 96 hr -4
			TBI 96 hr -5	144.87	132.387	135.919	24.8358	14.4837	275.991	0	33.6832	1310.73	397.38	7.12768	28.0031	695.983	1.94541	2.3793	31.7825	581.758	100.598	1621.37	206.618	0	5038.92	3.42054	0	0	8.57773	69.9551	444.099	0	3.31983	665.136	58.1791	51.2188	19389.9	0.698544	0	36.9229	31.4326	31.9908	0	TBI 96 hr -5
			TBI 96 hr -6	140.508	138.472	173.026	21.345	37.0251	395.294	0	24.7263	1685.38	370.597	17.5084	25.1763	1097.22	0.506491	1.39649	16.7319	606.851	0	1429.09	35.2253	0	4311.31	2.42801	0	0	0	60.3367	0	0	2.88447	709.22	111.653	29.8676	39621.3	0	0	32.9166	38.5668	29.7589	0	TBI 96 hr -6
			TBI 96 hr -7	169.23	127.07	114.604	25.0562	49.931	163.112	0	21.2051	1639.73	338.771	6.81037	26.4074	474.723	1.09584	2.0489	22.0962	438.441	340.533	1656.28	107.291	53.9994	7685.19	4.28518	18829	0	96.173	92.9932	0	0	5.40988	506.353	46.3955	40.3129	40980.2	4.5541	0	30.5273	35.9254	36.2131	0	TBI 96 hr -7
			TBI 96 hr -8	192.375	149.946	172.563	30.4995	1.35906	465.599	0	43.2778	1904.47	572.27	13.663	42.263	960.072	2.41952	2.3456	57.9475	760.728	313.909	2103.76	306.434	71.3411	7969.25	7.15234	8117.55	0	108.669	95.0609	4253.27	0	5.55501	1030.57	58.0451	29.0795	42231.6	6.14944	0	41.1307	51.5976	39.6873	0	TBI 96 hr -8
			TBI day 7-1	108.614	116.227	332	8.42019	98.2043	333.13	0	17.2163	1110.14	182.478	6.25101	22.5314	786.266	0.69209	1.59957	28.3412	397.726	18.343	1424.95	143.697	632.241	6572.53	3.72898	17508.4	0	101.843	73.9423	1481.71	97.0948	4.77125	653.902	81.8195	81.5431	46265.9	4.20351	0	32.0674	67.1159	56.5734	0	TBI day 7-1
			TBI day 7-2	151.597	117.181	246.319	4.43266	20.9296	342.269	0	10.0447	1378.54	0	8.71087	12.59	782.251	0.651745	0.636031	0	177.835	42.664	985.88	19.7275	218.664	3407.32	1.24042	0	0	80.1694	89.3314	0	611.451	4.20917	440.74	16.91	60.1396	60136.2	3.79365	0	15.6986	59.6063	7.79567	0	TBI day 7-2
			TBI day 7-3	89.3754	88.181	129.115	1.58337	93.4773	245.652	0	7.64142	1247.24	61.3393	7.43499	11.1185	706.519	0.216418	0.927662	13.0817	126.3	44.0706	944.63	29.3597	289.882	3271.2	1.77764	0	0	25.6207	69.3412	0	0	4.84903	304.662	12.8322	61.9391	33920.3	0	0	17.4812	77.5665	3.68965	0	TBI day 7-3
			TBI day 7-4	115.95	85.471	126.18	2.55529	67.0167	221.01	0	5.79462	2018	0	7.87688	5.01021	614.507	0	0.543931	0	0	162.307	855.952	1.96705	78.2799	3568.41	1.31683	0	0	39.2056	104.444	0	0	7.59073	270.799	13.9016	81.5686	40758.8	3.09074	0	16.9085	60.5169	11.944	0	TBI day 7-4
			TBI day 7-5	234.066	109.736	199.517	21.6014	18.004	119.071	0	25.1372	2302.47	508.155	4.51618	28.2009	714.633	1.3735	1.80359	24.4683	352.84	41.1959	1496.18	203.353	256.844	6439.15	4.4383	0	0	70.9769	79.503	4477.35	124.764	4.64967	756.51	53.9233	55.9716	42606.4	2.17731	0	34.8739	52.4728	36.1103	0	TBI day 7-5
			TBI day 7-6	163.448	114.455	18.8922	16.199	0	319.326	0	23.4372	1721.39	182.169	10.678	21.2272	1066.23	0.783478	1.872	12.5961	477.868	45.644	1137.38	115.708	0	4817.12	1.96569	0	0	3.36586	73.134	0	0	4.71351	546.959	38.6932	34.4113	14342.9	6.69951	0	31.4171	39.7894	35.6582	0	TBI day 7-6
			TBI day 7-7	182.706	86.2398	120.8	9.63773	16.4269	102.33	0	11.1293	1905.87	167.203	4.75454	15.6285	500.509	0.274658	1.54533	7.31327	303.061	0	1065.54	62.0249	0	4079.97	2.23767	0	0	0	46.1148	0	210.616	3.92478	389.102	7.61261	46.0434	51336.2	0	0	28.8742	40.7108	28.6868	0	TBI day 7-7
			TBI day 7-8	192.377	81.9693	262.06	2.05253	53.182	276.853	305.893	20.726	1874.09	0	10.6193	10.0365	169.016	0	2.61538	0	153.858	4.3886	865.684	133.399	0	1599.27	1.0225	0	0	0	93.7133	2966.41	1715.56	10.3302	627.081	76.2509	60.3595	21715.3	8.68457	0	14.5867	36.3733	33.6228	0	TBI day 7-8
			TBI day 7-9	222.821	140.89	281.581	38.7044	36.7027	198.353	0	38.0036	1713.43	555.766	9.60716	30.5286	694.532	1.56176	2.45368	42.5335	584.418	168.56	1804.18	235.28	0	6935.16	5.47579	0	0	10.2018	39.4167	3120.05	170.804	3.13881	683.413	88.1481	47.9512	44948.7	7.77385	0	37.4029	37.994	41.0673	0	TBI day 7-9
			TBI day 7-10	200.074	100.366	121.622	33.831	1.4311	229.241	0	38.2372	1673.55	586.151	7.55481	32.4258	640.691	2.41012	2.25742	49.6469	332.354	358.395	1947.69	292.496	315.032	7141.13	5.47768	4064.23	0	98.8416	56.6629	1712.65	248.862	2.31371	763.137	56.4576	28.729	31878.4	7.58715	0	36.729	42.7302	44.4889	0	TBI day 7-10
			TBI day 7-11	274.79	123.408	285.195	20.0827	29.996	136.478	0	27.3281	1270.42	352.382	4.22563	25.7746	425.552	1.00489	2.05016	27.1887	496.424	0	1743.36	161.213	7.84572	5710.68	3.82913	0	0	0	50.3793	992.172	0	3.82784	608.132	51.3364	102.983	50680.5	0	0	22.0604	43.5542	54.0722	3.12168	TBI day 7-11
			TBI day 7-12	221.427	111.974	135.523	21.2876	75.8984	190.291	280.023	38.5417	1943.16	358.351	7.64035	21.2423	368.988	1.20433	2.33815	42.8177	327.74	187.716	1659.67	225.531	332.894	5271.13	4.46397	5465.75	0	53.7526	55.1083	2415.32	0	3.18541	843.691	44.2761	86.0215	35354.1	3.06694	0	28.1202	49.6277	39.7334	0	TBI day 7-12
			TBI day 14-1	269.086	120.329	240.08	7.56315	89.5985	309.417	0	22.9651	2006.06	154.162	5.83541	22.1389	554.41	0.902643	1.71324	35.1906	209.311	312.65	1475.85	148.148	420.264	5815.51	3.68829	225.887	0	93.6543	70.8339	0	0	5.56569	455.628	24.4248	117.177	43352.7	3.80504	187.232	35.0992	104.603	80.3873	0	TBI day 14-1
			TBI day 14-2	203.555	114.498	323.863	3.9919	112.956	305.333	289.086	0	1346.88	0	7.4313	5.22065	418.327	0.134636	0.587706	0	166.61	268.125	743.47	26.3253	611.442	3286.71	1.6807	521.672	72.9928	62.855	88.4101	0	10.6779	5.1151	832.536	37.4045	65.0753	85867.9	2.2258	0	16.2236	68.2599	16.3003	0	TBI day 14-2
			TBI day 14-3	86.9675	68.2966	201.414	1.88397	88.4053	188.328	0	7.20347	1337.84	62.1137	5.29547	10.2804	506.554	0	1.20209	8.83369	143.761	83.6651	1087.24	28.6983	265.943	3456.97	1.33241	0	0	0	67.3557	1595.02	2951.81	5.59373	219.862	6.16392	62.3041	34408.7	0.757711	0	24.3779	58.4606	1.647	0	TBI day 14-3
			TBI day 14-4	82.9859	56.2567	158.717	2.53298	46.0308	376.92	0	0	899.999	0	4.765	5.13449	557.877	0	0.179066	0	26.2268	81.1668	543.557	0	122.892	2854.13	0.405367	3476.42	0	36.2442	69.3918	0	150.952	4.44469	288.447	1.10069	56.113	36974.2	2.13471	0	15.4331	38.9317	0	0	TBI day 14-4
			TBI day 14-5	217.263	127.457	182.964	15.7797	58.9855	188.623	0	24.4381	1095.54	244.845	5.54927	21.6731	281.045	0.894274	2.25686	23.8422	799.922	108.802	1661.27	201.406	97.3045	6752.84	3.49075	9150.48	0	27.5409	61.3535	3790.49	513.233	4.04763	847.166	79.4962	45.2928	33436.4	6.24556	0	32.2362	41.1915	34.5092	0	TBI day 14-5
			TBI day 14-6	228.921	123.366	162.097	26.0073	62.244	172.715	0	30.9085	1520.6	334.853	7.96847	35.3237	485.607	1.03583	3.01918	30.1749	968.725	883.242	1739.63	184.024	150.834	7385.93	5.0459	3222.84	0	174.068	73.2459	4666.58	516.391	5.50525	666.031	42.337	81.4305	43589.8	8.60357	0	47.7161	80.2051	72.719	0	TBI day 14-6
			TBI day 14-7	229.485	205.007	303.977	32.1144	65.5674	201.665	0	36.0795	1875.37	331.683	12.4026	34.3428	825.385	2.19808	2.37094	40.9198	635.257	67.8734	1965.27	110.056	284.723	7440.47	4.22034	0	0	0	53.4078	0	3.83775	3.97237	1148.44	168.201	33.0388	48511.9	2.69439	0	29.7341	50.015	34.8839	0	TBI day 14-7
			TBI day 14-8	189.005	145.543	155.251	26.5381	247.799	382.866	31.7103	83.7045	2290.73	788.247	15.2169	48.0983	676.506	4.52601	3.24475	62.3032	1311.75	872.185	2447.95	359.615	310.177	7690.02	8.39831	10935.2	0	147.872	93.34	6516.19	440.455	4.64881	699.694	66.6107	26.0836	39505.8	13.8292	0	51.8683	63.9597	50.633	0.396281	TBI day 14-8
			TBI day 14-9	197.427	109.344	57.3974	27.6476	55.106	143.447	384.751	27.4916	1159.62	400.609	5.98848	32.6556	629.698	1.39096	2.1899	36.5681	587.742	115.78	1576.97	203.546	0	6422.38	4.10943	2515.73	0	39.5625	81.8228	2459.09	280.275	4.45904	323.493	17.0663	22.3506	40793.4	4.03215	0	35.3174	39.5403	47.7541	0	TBI day 14-9
			TBI day 14-10	203.673	197.511	236.66	41.3099	13.7828	353.293	26.6815	73.4138	2107.37	752.237	17.4604	30.1116	923.517	3.3637	2.80298	55.8254	894.356	722.38	2239.5	264.569	315.55	7631.97	7.83843	14223.8	0	214.949	127.867	2730.45	144.846	6.68644	1012.59	118.428	68.0159	24411.7	10.0942	0	42.5211	52.0863	48.0479	0	TBI day 14-10
			TBI day 14-11	216.184	149.618	52.5072	29.6445	40.3672	109.168	0	29.8878	1848.25	498.444	4.76168	21.1487	525.717	2.07732	1.76043	34.158	466.512	405.719	1794.8	178.575	309.337	7596.84	3.96951	1752.37	0	46.2773	98.4309	723.98	98.7729	5.53888	483.847	45.2267	33.6343	33791.8	5.12839	0	32.2534	35.0887	38.6814	0	TBI day 14-11
			TBI day 14-12	231.942	162.318	456.349	37.8423	134.654	355.376	294.748	56.9364	2404.4	847.95	17.213	31.2583	854.281	2.92995	2.9856	52.363	1028.44	712.73	2230.84	303.038	409.538	8758.22	5.67695	18980.9	0	154.315	140.339	4968.02	677.433	8.25592	845.014	45.1911	42.442	45806.4	17.3637	0	49.8425	53.182	54.0195	1.17795	TBI day 14-12
			TBI day 30-1	124.064	159.953	328.22	4.87012	174.464	684.704	0	12.3015	1183.14	112.011	5.93452	12.6312	421.854	0.160598	1.23506	19.7778	257.263	3.36146	1350.99	30.9994	658.167	4092.97	2.28528	0	0	18.8102	71.0393	0	53.4133	5.19319	700.954	125.763	85.0921	45036.6	1.54367	0	27.6762	71.7996	38.549	0	TBI day 30-1
			TBI day 30-2	113.268	160.087	156.495	14.1708	60.6827	267.167	0	23.4617	1225.9	253.372	6.44165	24.0051	815.414	1.68571	1.37839	30.7088	508.089	202.651	1442.96	154.916	378.537	6849.33	3.71365	243.296	0	155.896	82.1219	2063.61	233.799	3.97255	430.294	40.3321	59.326	44675.6	4.21904	0	32.5555	43.1112	20.0568	0	TBI day 30-2
			TBI day 30-3	156.119	59.7208	48.9663	13.6602	57.8438	199.039	0	28.7638	1253.84	355.683	4.69635	21.2348	625.515	0.925562	1.91083	34.1843	358.544	42.0497	1867.44	191.627	342.701	6915.37	5.31887	0	0	67.8049	66.812	0	0	5.39159	838.026	20.4249	49.1109	63074.2	0	0	34.0442	58.0242	42.6688	0	TBI day 30-3
			TBI day 30-4	127.589	162.259	277.194	16.0746	128.884	274.29	0	39.7565	1274.39	365.992	6.84282	24.5671	884.054	1.73787	1.10054	39.3606	225.983	349.751	1637	315.166	525.675	5121.92	4.62249	0	0	129.22	75.8849	5026.44	841.785	5.50903	397.591	67.5604	80.2767	38779.9	0	0	28.9833	53.9763	33.5424	0	TBI day 30-4
			CYT-6 antibody array
			LOD	112.899	275.287	52.9235	23.4086	110.646	11.1002	0.986	0.897369	13.4548	41.8784	19.4686	2.57988	3.71024	2.10595	15.4358	1.97886	17.6792	0.593961	16.2855	114.119	47.5947	92.3927	193.446	1.98082	1.60152	6.06728	67.7605	4.97606	8.31203	0.579801	114.519	31.1215	70.663	91.0281	5.97311	46.1776	21.6105	26.7208	7.10477	112.457	LOD
			MAX	25000	100000	10000	40000	25000	40000	2500	5000	40000	20000	10000	10000	25000	10000	2000	2000	2500	1000	10000	25000	40000	40000	20000	5000	5000	10000	200000	10000	40000	1000	20000	10000	25000	50000	10000	4000	4000	25000	10000	10000	MAX
			Protein name	4-1BB	ACE	ALK-1	CT-1	CD27	CD40L	CTLA4	Decorin	Dkk-1	Dtk	Endoglin	Fcg RIIB	Flt-3L	Galectin-1	Galectin-3	Gas 1	Gas 6	GITR L	HAI-1	HGF R	IL-1 R4	IL-3 Rb	IL-9	JAM-A	Leptin R	L-Selectin	Lymphotactin	MadCAM-1	MFG-E8	MIP-3b	Neprilysin	Pentraxin 3	RAGE	TACI	TREM-1	TROY	TSLP	TWEAK R	VEGF R1	VEGF R3	Protein name
			sham -1	0	17356.8	40.6915	759.402	33.4894	24.6593	0.901993	746.846	73.878	735.376	1578.91	489.586	124.917	2359.91	170.01	116.156	0	12.3308	0	3.4343	460.537	0	590.234	1176.09	3331	43.8121	0	192.203	1310.13	0	1219.98	407.218	22.3043	51.7123	238.134	333.222	0	1307.27	916.193	30.059	sham -1
			sham -2	0	17128.5	0	0	51.8959	23.1584	7.02332	1194.58	67.7499	896.67	2051.96	361.407	213.219	2943.08	227.154	124.729	8.04696	0	0	33.645	394.287	3021.52	360.908	1367.59	2261.62	225.133	0	319.687	966.299	9.37942	1330.89	165.088	489.742	286.208	0	345.773	0	1253.78	1454.16	110.272	sham -2
			sham -3	66.9778	10137.8	1035.99	1732.78	465.611	64.3556	17.5251	777.558	303.337	2362.77	2047.14	313.391	178.345	2658.44	257.468	86.4026	20.2907	3.74791	149.118	1102.73	835.784	5435.16	986.459	1173.6	865.631	692.472	81.2705	62.9425	437.209	17.8869	281.93	242.08	703.512	216.931	996.003	263.031	98.7094	1633.84	907.336	196.126	sham -3
			sham -4	0	16453.5	0	0	0	14.1076	15.4967	1100.95	100.129	591.538	2056.69	361.594	138.786	2331.31	184.226	99.8469	0	0.403046	0	0	301.592	0	391.398	1198.32	0	2.82047	0	89.2877	579.042	0	1116.79	68.6961	309.582	206.315	0	346.354	0	1014.84	1195.53	226.289	sham -4
			sham -5	0	27285	810.92	513.914	0	210.618	41.2613	1246.46	431.409	576.205	2112.57	390.272	389.924	3729.02	554.631	136.57	13.3674	7.74003	283.628	1597.14	447.263	3822.46	690.74	1025.08	627.555	104.989	49.8736	379.334	703.242	81.6298	1142.07	541.439	573.17	658.332	3292.1	522.776	46.4149	1205.29	1006.08	271.579	sham -5
			sham -6	0	15986.8	1207.57	5034.26	542.288	138.812	17.3772	1453.83	301.892	575.656	1427.75	447.378	281.678	2955.2	451.371	101.622	2.32953	5.89664	83.3111	1322.63	429.171	14242.7	844.426	1093.43	753.477	109.169	16.8137	295.894	1512.44	40.5339	1100.55	500.105	258.365	474.943	2500.73	457.618	88.5737	816.501	1636.85	177.159	sham -6
			sham -7	0	27188.5	2003.6	803.254	730.573	67.0618	24.6657	1468.27	121.822	732.836	2024.29	636.361	206.282	3537.95	397.354	144.658	23.8367	6.32122	181.696	1588.73	772.988	5532.95	1333.59	1715.18	8798.23	259.834	656.911	711.399	1588.77	16.121	1365.56	1156.6	335.717	397.717	1709.14	421.83	102.819	868.523	1740.99	291.352	sham -7
			sham -8	29.1286	14965.6	672.316	1562.52	1254.59	121.334	17.7936	876.608	110.071	738.951	2138.3	1181.53	365.444	3174.91	311.768	142.666	23.7452	2.21388	164.76	651.597	630.943	2097.14	1159.18	1652.75	3794.38	151.934	110.985	446.661	1761.82	5.26001	1552.54	796.649	326.513	251.31	2025.44	397.026	76.6359	855.671	1921.98	658.842	sham -8
			sham -9	24.2725	29889.5	1210.96	2610.11	1553.12	9.05142	4.82568	1250.14	83.0236	1044.04	1521.34	907.528	262.728	3404.12	369.263	143.714	74.2418	3.551	83.572	1222.64	870.457	7428.97	957.314	1516.35	3361.64	165.011	0	450.645	1536.56	9.5461	1629.03	544.469	245.397	1245.37	556.185	437.257	100.165	986.233	1845.24	643.392	sham -9
			sham -10	0	17107.5	654.747	2796.77	381.227	131.144	0	1018.39	165.512	1000.5	2387.87	593.388	241.54	3506.18	260.97	184.709	38.6433	3.30504	99.5381	1684.54	758.415	2560.87	999.035	1828.5	4262.92	332.004	642.394	362.034	1937.08	16.6323	2013.48	643.205	406.187	453.44	235.395	880.231	91.0011	1170.1	1724.75	541.669	sham -10
			sham -11	0	17330.2	0	5.10086	370.704	162.575	0	670.577	310.783	1267.09	713.256	1439.52	219.977	2594.47	84.0589	95.1711	91.9341	5.43349	0	0	553.068	0	837.596	1293.94	121.489	213.468	1611.5	63.3379	1496.45	0	1192.06	486.77	0	287.743	3170	406.071	0	894.581	1148.92	42.9122	sham -11
			sham -12	0	17902.9	0	0	611.48	43.9438	0	1034.5	181.023	1147.96	1125.54	943.921	232.602	2710.9	113.074	107.92	127.002	8.04153	38.1284	1296.02	718.984	0	567.966	1290.7	2088.32	257.545	454.103	1009.95	1907.45	0	1515.84	502.803	0	935.646	1004.95	553.442	81.0159	752.727	983.535	457.313	sham -12
			sham -13	0	16412.2	0	0	636.322	116.233	0	715.013	82.1362	1024.13	791.906	1099.56	163.397	2717.24	90.2586	90.4778	117.532	2.44905	0	0	450.851	21.7755	1075.4	1033.37	6255.4	197.649	0	452.7	1400.37	0	1203.06	568.868	91.193	336.429	1180.03	477.493	0	568.738	1189.89	394.233	sham -13
			sham -14	0	18973.4	0	0	482.678	117.688	1.84236	860.461	188.284	888.613	894.714	809.816	212.402	3234.35	201.864	105.954	59.2823	4.15801	136.949	0	529.733	0	782.532	1271.6	5882.01	97.1406	146.609	643.467	1120.28	10.9771	1428.93	771.749	78.5613	308.816	1175.27	372.887	101.333	595.278	1246.9	264.227	sham -14
			sham -15	0	14568.1	10.6857	0	175.401	160.583	9.60551	1036.8	87.4452	719.356	1007.89	1115.59	168.644	2587.95	135.86	72.8885	58.7897	0.331868	0	0	474.181	0	279.773	968.839	3538.01	92.437	19.3372	515.736	905.951	1.13918	831.943	304.508	124.636	109.665	249.02	441.923	52.7758	801.397	1124.37	85.9661	sham -15
			sham -16	0	10043.1	0	0	461.03	50.8306	0	686.24	59.1241	862.577	865.744	406.661	104.619	2419.37	71.7125	75.2013	52.6952	2.36806	131.115	0	659.591	0	485.147	1038.37	4374.94	61.3449	201.177	362.21	844.486	12.3867	1590.16	453.238	122.476	13.0578	949.285	357.13	84.6491	620.07	1077.72	164.467	sham -16
			sham -17	0	25684.8	0	0	393.187	75.4339	6.22387	1311.68	179.071	634.89	1198.42	822.164	335.517	3015.26	115.081	127.773	99.6851	11.6567	0	0	460.088	5525.72	444.034	1242.3	6511.66	162.745	768.775	39.8953	1557.7	10.8323	1331.49	672.751	166.846	0	1488.46	569.822	10.1701	925.126	1695.98	64.1985	sham -17
			sham -18	0	16809.2	0	223.771	341.399	50.1656	0	1194.43	56.6101	1094.52	921.409	1862.12	296.155	3030.71	136.334	132.898	54.3808	8.33808	93.4873	1805.28	570.26	0	1234.71	1064	85.3905	302.026	138.146	547.79	1714.91	0	1080.95	504.418	59.5913	503.41	1933.56	486.798	66.6049	654.331	1076.89	83.9687	sham -18
			TBI 8 hr -1	7.76701	15904.7	1454.62	2347.86	1079.54	99.7829	3.42999	1071.35	143.437	824.53	2906.32	1417.94	165.17	3186.05	430.696	161.764	31.82	5.46496	104.216	1365.33	782.19	3832.48	1035.93	1766.12	3988.91	133.312	504.433	445.225	1367.19	22.8936	1630.34	875.356	379.749	259.886	1954.04	721.156	93.662	2317.67	1529.09	367.622	TBI 8 hr -1
			TBI 8 hr -2	0	16438.8	325.401	0	123.907	50.1098	7.448	1286.68	186.473	657.789	2251.84	779.764	265.514	3164.48	443.538	197.158	17.5041	2.4661	173.068	711.692	617.589	1433.22	857.534	1892.62	764.966	180.874	138.993	429.198	1508.31	31.1411	1762.08	547.681	260.983	251.934	89.0788	749.124	36.4479	1385.17	2022.54	375.361	TBI 8 hr -2
			TBI 8 hr -3	0	23628.3	282.349	2748.47	1331.86	110.93	5.2872	1623.45	82.6318	796.934	2265.83	751.09	242.764	3015.61	344.443	135.472	27.9239	10.9812	0	182.961	769.794	2847.13	1251.48	1547.28	8118.26	207.132	1359.21	298.154	1302.6	32.8212	1160.68	927.392	529.833	416.502	1846.45	615.991	94.4025	1673.9	1809.98	322.327	TBI 8 hr -3
			TBI 8 hr -4	25.2509	23516.1	718.362	698.558	966.02	64.8105	12.7874	1794.09	241.374	618.359	1954.76	749.85	165.034	3313.46	457.934	171.288	15.7447	8.60006	79.0954	582.457	636.791	110.992	1100.26	1621.38	1594.57	196.781	356.508	414.833	1232.64	14.2117	1526.46	257.467	224.453	324.6	490.561	654.177	3.08091	1029.68	1591.07	238.277	TBI 8 hr -4
			TBI 8 hr -5	0	29565.7	0	0	434.561	82.7622	11.606	1074.69	64.7483	875.794	931.102	1917.79	325.112	3036.48	202.233	127.566	186.802	16.2813	0	490.289	381.631	3985.11	624.508	1256.13	134.105	99.7122	148.904	118.717	1465.85	0	1470.13	632.469	183.962	310.159	392.086	634.104	26.7998	459.183	1566.17	243.05	TBI 8 hr -5
			TBI 8 hr -6	0	20949.9	0	0	503.786	125.616	8.9406	1019.71	43.8345	1646.82	855.026	1456.96	232.144	2962.42	145.065	111.18	83.0485	6.19624	0	0	601.738	7710.25	317.82	1362.46	10092	161.727	0	346.982	1092.21	0	1662.15	677.961	48.8195	671.098	3139.62	417.123	82.9728	1228.28	1291.82	212.448	TBI 8 hr -6
			TBI 8 hr -7	0	19210.1	0	0	312.1	86.0288	0.743265	1029.55	9.66734	1159.35	652.975	750.112	254.296	2813.55	249.739	178.331	183.484	9.77382	175.033	1950.83	400.17	1784.86	1024.09	1297.65	0	105.937	0	51.8958	1608.97	0	1525.54	633.993	73.1649	290.56	422.297	634.169	0	692.667	1487.62	35.2022	TBI 8 hr -7
			TBI 8 hr -8	0	21588.9	0	0	771.942	151.612	3.93368	830.909	90.3962	977.469	843.795	1747.49	183.512	2808.11	120.546	119.203	94.8241	7.41504	162.391	0	433.631	6232.7	755.075	1123.13	1933.92	61.8673	300.269	98.5636	1441.38	8.70305	1315.12	275.412	28.0358	96.5953	779.76	509.446	22.331	1043.63	1486.89	236.011	TBI 8 hr -8
			TBI 8 hr -9	0	29593	0	0	25.5665	62.9847	20.8674	1575.38	138.571	584.329	958.321	1394.21	407.702	3126.82	245.938	196.635	225.583	4.16736	270.752	821.318	304.884	5340.44	527.153	1186.98	0	72.4161	221.545	68.1472	1321.84	35.8703	1694.63	469.923	130.988	66.4903	113.794	739.646	9.2073	715.431	1888.4	151.433	TBI 8 hr -9
			TBI 8 hr -10	0	20743.8	0	0	485.877	140.448	0	996.055	77.0767	1214.33	837.658	1227.57	210.285	2736.41	114.005	110.673	66.3353	3.92489	0	2968.39	502.987	1350.32	853.841	1053.01	812.535	193.499	668.678	358.201	1419.55	64.5798	959.378	560.443	308.603	866.866	0	632.513	90.1995	556.058	1419.87	220.813	TBI 8 hr -10
			TBI 8 hr -11	0	22248.7	0	101.636	1056.98	98.7918	4.36051	1215.01	98.2495	1287.49	742.884	1636.57	260.642	3426.17	268.909	196.294	125.952	0.876553	0	786.341	206.581	0	389.832	839.728	0	0.213708	0	87.8989	1008.19	0	1051.67	191.622	0	119.662	0	445.689	0	380.76	1131.76	0	TBI 8 hr -11
			TBI 8 hr -12	0	15711.6	0	0	188.934	0	1.57863	1378.29	19.5058	769.059	796.411	661.413	333.019	3646.67	339.436	195.176	89.3118	0	0	206.056	90.6289	0	82.8917	816.344	0	0	0	168.311	802.425	0	1837.68	21.7031	0	0	0	442.332	0	116.172	1226.8	0	TBI 8 hr -12
			TBI 24 hr -1	136.426	23516.7	1422.54	2313.83	1074.63	83.6463	21.0049	1092.82	168.564	601.173	1797.62	532.335	260.129	3441.28	413.909	117.552	13.3262	6.26586	253.926	1802.75	567.365	4482.34	1079.65	1452.41	5244.09	143.723	529.394	300.238	700.287	15.7608	1064.84	889.185	323.714	310.005	3005.87	568.93	110.962	1048.9	1316.98	343.024	TBI 24 hr -1
			TBI 24 hr -2	51.7458	15659.6	1722.45	1756.47	936.676	174.354	8.08261	1376	134.191	426.914	2089.38	281.509	188.041	3362.82	332.942	115.845	13.541	18.9748	23.4815	331.122	496.029	5294.98	1165.96	1429.38	4679.71	65.18	581.8	30.9968	795.936	16.1977	1291.98	545.138	267.279	135.61	997.93	571.594	101.861	1079.82	1548.21	208.432	TBI 24 hr -2
			TBI 24 hr -3	167.301	18263.8	2280.82	2174.43	982.804	141.307	16.426	1149.4	28.2962	426.247	2062.71	304.246	168.11	3584.24	439.985	109.575	6.81183	5.96209	27.2973	3174.22	467.317	2257.61	663.704	1345.61	4381.94	141.749	337.886	120.395	532.681	17.025	1095.84	528.132	273.217	317.593	1072.21	480.468	64.6505	1160.62	1606.03	256.316	TBI 24 hr -3
			TBI 24 hr -4	50.9957	17833.6	460.425	1621.65	320.169	82.7321	0	1265.35	194.22	385.951	2396.81	550.524	171.522	3631.13	390.287	139.396	32.1165	6.41275	0	1896.15	414.448	4575.08	858.289	1605.86	1178.82	110.574	514.782	306.379	884.497	24.4414	1233.09	409.111	402.714	205.307	1589.5	681.924	23.3742	1112.44	1578.62	313.531	TBI 24 hr -4
			TBI 24 hr -5	0	19738.1	0	0	263.022	2.99403	26.4066	1501.57	91.747	724.108	1072.5	1288.94	285.066	3637.13	460.357	166.873	100.451	0	0	587.677	184.519	0	0	871.624	0	0	0	0	775.753	0	1168.21	119.608	0	0	0	505.454	0	338.509	1116.2	0	TBI 24 hr -5
			TBI 24 hr -6	0	15764.2	0	0	1058.26	172.375	1.94706	1470.93	0	938.661	605.244	1747.55	320.283	3260.45	443.093	165.191	74.8883	1.55375	0	0	161.822	0	215.75	853.716	0	0	0	77.8281	760.89	0	1056.47	161.248	23.9545	0	0	470.381	0	197.178	1321.53	0	TBI 24 hr -6
			TBI 24 hr -7	0	25742.7	0	0	540.648	55.1953	11.1297	1219.23	108.025	768.709	1284.46	533.024	371.037	3399.83	430.489	172.079	68.9512	2.1133	0	236.39	314.531	0	339.628	899.907	0	73.1941	0	0	1074.86	1.33246	1189.79	211.387	64.3379	22.5251	0	589.655	0	772.232	1374.99	5.07998	TBI 24 hr -7
			TBI 24 hr -8	0	14173.9	198.417	0	396.849	142.514	9.43385	904.378	90.5099	708.28	1126.89	1080.94	353.299	3198.14	261.318	154.875	37.0841	0.513219	0	0	171.278	0	0	790.039	0	0	0	0	752.288	0	840.391	71.2678	0	0	0	455.892	0	417.379	1265.49	0	TBI 24 hr -8
			TBI 24 hr -9	0	20396.7	0	0	675.272	40.3194	3.04646	960.069	82.185	876.65	747.524	602.755	229.389	2902.22	162.676	140.013	49.2782	2.64737	80.3566	382.818	178.234	0	102.824	719.143	0	0	0	2.75227	762.591	0	1170.62	0	86.1573	153.657	0	425.026	0	133.952	1364.34	21.4426	TBI 24 hr -9
			TBI 24 hr -10	0	38402.5	0	0	561.08	164.263	11.1101	1538.19	117.247	866.39	986.544	964.346	253.985	3127.4	309.894	129.579	41.0186	1.68815	35.4371	161.587	146.214	0	126.616	787.448	0	0	195.947	0	905.78	0	853.309	172.375	90.4003	0	0	399.087	0	318.756	1060.57	0	TBI 24 hr -10
			TBI 24 hr -11	0	20253.5	0	0	947.523	128.963	25.28	1304.33	57.3642	704.883	1013.75	1149.92	280.572	3707.47	305.798	170.315	56.5385	0	0	0	143.988	0	92.1069	907.144	0	0	0	0	798.326	0	1130.55	0	0	0	0	427.564	0	280.493	1479.42	0	TBI 24 hr -11
			TBI 24 hr -12	0	16890.9	0	0	934.427	113.13	8.49142	1196.1	55.754	333.454	1068.53	1031.87	273.285	3557.94	338.942	172.479	60.2006	1.52406	0	0	50.4903	0	120.848	699.862	0	0	0	0	733.271	0	864.701	4.07995	14.6381	0	0	304.145	0	241.22	977.27	0	TBI 24 hr -12
			TBI 48 hr -1	0	41109.6	0	0	530.055	119.238	20.6776	1660.5	147.149	791.493	686.654	1185.34	335.342	3616.54	368.571	184.313	108.319	5.07247	0	0	126.634	0	103.241	660.114	0	0	0	0	635.024	0	901.41	113.766	0	0	0	385.784	0	249.131	1498.26	75.7433	TBI 48 hr -1
			TBI 48 hr -2	0	23500.3	0	0	219.467	120.743	28.0456	1332.55	33.6923	407.393	730.605	1247.27	293.585	3261.28	479.981	135.985	170.992	0	0	199.349	84.6917	0	40.4084	640.177	0	0	0	73.8736	428.04	0	914.923	1.16714	0	0	0	216.125	0	0	860.986	0	TBI 48 hr -2
			TBI 48 hr -3	0	32381.4	35.258	0	376.653	229.506	51.4423	1407.5	236.28	423.947	1042.86	831.452	390.476	3933.72	395.294	167.455	82.4981	1.94918	0	0	152.727	0	272.802	955.361	0	0	0	0	580.855	0	1198.22	27.7761	196.312	0	0	382.285	0	343.128	1390.3	0	TBI 48 hr -3
			TBI 48 hr -4	0	18703.4	0	0	199.578	114.02	0.292997	1069.05	33.8401	497.75	956.658	223.477	273.629	2890.85	134.86	137.956	53.6509	0.863287	0	0	114.109	0	23.0978	671.7	0	0	0	0	454.059	0	951.878	27.5733	46.777	97.7026	0	281.679	0	165.77	1061.43	117.506	TBI 48 hr -4
			TBI 48 hr -5	0	22367.2	532.205	568.704	1040.95	206.529	9.21009	1185.14	155.143	1059.88	562.634	1187.82	293.896	2826.92	293.186	153.329	93.2545	3.04521	0	0	88.3698	844.97	45.1218	826.398	0	0	0	33.7997	794.947	3.66032	979.749	151.695	84.1227	114.692	0	546.82	0	41.8593	1528.26	0	TBI 48 hr -5
			TBI 48 hr -6	0	22139.7	0	0	1610.5	232.387	7.1763	1254.39	197.797	854.412	1089.28	988.844	244.202	3145.72	377.704	151.029	99.3717	3.37176	0	0	258.432	0	152.944	758.594	0	14.1236	0	0	992.356	0	774.139	193.488	125.328	74.7256	0	467.79	0	199.661	1355.99	0	TBI 48 hr -6
			TBI 48 hr -7	0	19434.9	0	653.945	446.454	80.7252	9.38006	1052.7	11.2991	1254.89	624.113	775.873	355.644	3519.32	205.344	167.459	116.747	3.11117	15.1007	1287.45	302.36	3280.11	628.707	1219.53	0	62.0295	694.354	53.0491	1778.97	18.8221	1599.09	626.707	93.2903	339.963	251.369	560.698	0	334.657	1569.38	37.8324	TBI 48 hr -7
			TBI 48 hr -8	0	20489.7	0	0	119.217	3.2554	26.8282	1818.03	204.883	359.441	811.788	442.241	562.388	3786.17	516.14	182.728	56.7126	1.1158	10.979	0	72.0152	0	178.714	1068.83	0	113.949	0	0	803.254	30.4908	1360.36	205.467	112.789	0	76.8293	486.159	0	441.161	2107.92	0	TBI 48 hr -8
			TBI 72 hr -1	129.856	28659.1	1830.44	2157.05	576.792	228.441	34.2322	1392.27	162.568	547.036	2892.34	1516.5	336.201	3456.48	769.864	171.404	13.8931	6.43378	182.074	1802.09	590.817	6653.44	765.075	1437.93	1745.8	172.702	392.093	294.634	1341.69	4.35169	1488.62	626.27	178.089	386.855	404.859	796.814	89.5054	1047.91	2475.39	227.524	TBI 72 hr -1
			TBI 72 hr -2	50.598	27317.4	1830.29	2327.28	1191.3	222.104	19.3538	1054.57	257.451	541.991	1922.74	578.042	221.093	3914.62	466.447	178.032	46.9782	17.5393	136.938	2240.47	456.12	5575.36	978.848	1589.78	4156.22	225.638	472.717	415.39	1580.95	38.8781	1535.38	534.296	219.215	642.64	705.846	848.123	75.4958	1206	1824.05	448.74	TBI 72 hr -2
			TBI 72 hr -3	0	12154.3	0	1048.6	237.996	0	0	501.637	237.001	1029.75	2474.55	499.624	121.376	3191.2	236.491	176.649	38.7492	8.31375	126.957	4570.43	760.799	3009.85	1225.22	1757.86	3411.65	188.574	1250.07	424.964	1459.55	22.0758	1285.01	564.172	86.1982	669.712	760.329	469.009	114.159	1120.24	1089.55	489.296	TBI 72 hr -3
			TBI 72 hr -4	0	29012.5	123.241	0	399.142	0	11.4316	1209.2	125.924	691.556	1658.59	444	173.828	3123.65	378.781	141.355	12.7227	4.38865	72.6832	1279.51	749.598	6783.62	1146.48	1631.3	4370.85	126.359	472.951	431.376	1470.69	7.83357	1344.96	844.939	107.648	275.552	909.003	528.738	67.1414	822.767	1684.28	140.204	TBI 72 hr -4
			TBI 72 hr -5	0	17116.4	0	0	298.283	0	4.51258	678.147	60.6811	629.201	592.177	97.9267	217.524	2980.19	187.074	157.967	49.4015	1.22357	0	103.894	221.05	0	256.066	872.285	0	0	0	0	671.9	0	1329.62	266.345	45.8832	0	0	489.421	0	437.955	1333.25	0	TBI 72 hr -5
			TBI 72 hr -6	0	15844	0	0	619.239	84.184	0	914.478	76.5853	977.891	658.369	905.839	274.332	2922.97	242.698	174.325	76.3781	2.15649	0	0	296.649	0	255.421	1045.69	0	40.6126	0	399.621	1140.55	0	1454.11	521.92	288.1	0	0	461.88	0	406.403	1240.71	0	TBI 72 hr -6
			TBI 72 hr -7	0	25845	126.792	0	590.628	65.1313	12.3956	1176.56	167.04	752.095	631.215	433.265	323.989	3558.93	317.463	179.97	59.2623	2.53396	0	3.89693	266.662	0	151.875	998.861	0	60.1873	0	0	1091.75	10.0654	1256.57	252.385	108.605	0	0	483.858	12.4174	582.643	1487.5	69.91	TBI 72 hr -7
			TBI 72 hr -8	0	18379.2	0	22.4033	556.27	95.0748	19.5662	1215.16	199.105	788.52	674.654	789.326	267.999	3141.33	335.242	166.551	45.8845	4.0736	0	178.143	299.597	0	535.084	903.185	1199.61	74.7841	91.0656	353.328	1031.97	21.8926	1502.26	349.671	319.533	0	101.432	183.888	0	548.922	944.806	7.59213	TBI 72 hr -8
			TBI 72 hr -9	0	19921.1	0	0	886.462	148.467	6.79903	839.392	158.902	1000.45	765.595	498.279	164.423	2960.27	237.874	151.324	54.1722	4.44343	0	0	245.743	53.0468	302.358	912.451	0	0	0	251.233	1097.42	0	1143.04	216.707	100.266	111.306	0	387.216	3.87403	330.585	1072.54	0	TBI 72 hr -9
			TBI 72 hr -10	0	24880.6	632.583	2719.7	1596.5	177.975	81.8617	1017.27	91.5403	1332.27	489.407	824.332	207.406	2655.28	309.622	139.812	27.0529	0	0	178.299	378.272	0	272.612	959.064	0	51.2623	0	152.365	952.582	24.0582	1096.55	353.098	134.598	228.448	767.086	335.77	0	924.083	1206.36	0	TBI 72 hr -10
			TBI 72 hr -11	0	31887.8	0	0	691.97	69.7319	7.8315	978.89	15.6824	963.654	811.33	916.107	310.927	3136.58	329.632	177.829	128.033	2.82044	0	585.803	356.266	0	540.161	783.245	0	79.0757	0	307.767	1379	2.6738	1443.72	247.302	140.428	151.467	0	335.452	0	734.298	1126.02	44.6897	TBI 72 hr -11
			TBI 72 hr -12	17.1816	29019.5	0	1752.8	264.434	63.3486	22.3021	1151.34	9.06266	884.05	941.222	712.755	277.313	3481.06	513.548	222.878	52.4735	2.06303	0	91.8822	301.591	0	429.439	989.921	0	80.0755	0	0	1037.67	36.6693	1406.97	332.986	0	0	0	464.422	0	597.677	1716.58	0	TBI 72 hr -12
			TBI 96 hr -1	0	22219.8	937.733	1154.34	830.01	94.6793	32.62	1115.18	90.7533	646.56	809.002	595.995	352.705	3154.52	421.154	173.071	152.769	1.57834	33.2747	566.313	296.384	5865.81	306.494	977.956	0	0	0	19.946	698.086	18.0067	1324.53	117.813	266.268	196.408	0	486.505	94.9982	363.065	1496.75	67.0876	TBI 96 hr -1
			TBI 96 hr -2	0	24467.1	235.596	631.01	2108.12	69.2418	7.70157	756.632	99.9512	1306.59	799.328	715.122	172.469	3090.17	449.423	194.405	63.5613	11.226	4.23924	1472.69	411.048	0	540.456	993.808	2608.72	0	0	109.149	1445.78	0	1119.53	447.458	34.0828	235.565	0	503.469	79.2152	78.7387	1191.79	0	TBI 96 hr -2
			TBI 96 hr -3	0	20049	0	0	1233.74	20.5732	35.9177	955.325	102.381	1172.25	788.946	2040.43	341.527	3550.01	481.849	189.955	91.5075	0.880313	0	180.149	285.519	834.103	222.51	945.114	0	4.10291	0	214.888	1115.99	0	1201.95	239.549	23.1214	6.6594	0	358.596	0	31.2921	1336.68	19.3419	TBI 96 hr -3
			TBI 96 hr -4	0	26545.7	157.863	0	1178.11	26.1389	16.0995	829.198	305.02	1294.18	954.567	614.283	278.07	3372	312.428	185.218	83.497	2.06356	72.2551	1944.77	249.348	1415.66	319.089	910.33	0	6.12147	0	66.7598	1029.56	4.30593	1206.11	149.085	153.772	151.117	0	417.156	0	350.836	1095.86	59.9224	TBI 96 hr -4
			TBI 96 hr -5	0	15681.8	77.973	290.957	1324.6	107.405	3.78136	518.781	88.1774	1093.45	642.152	379.21	203.086	2861.61	169.223	155.864	62.3339	1.15767	1.76615	2.39271	280.992	0	420.568	829.499	77.3313	0	0	105.507	740.377	0	859.002	428.081	17.0133	126.155	0	306.57	0	77.2766	984.326	0	TBI 96 hr -5
			TBI 96 hr -6	0	18845.6	384.612	0	971.282	64.8724	14.3679	1213.78	231.802	939.392	759.76	261.688	241.492	2782.4	266.136	114.762	25.3824	0	111.187	0	338.745	0	618.748	912.744	0	0	0	7.39769	486.932	11.8817	869.04	132.149	89.5846	0	0	393.552	0	107.311	923.431	10.4131	TBI 96 hr -6
			TBI 96 hr -7	0	14058.4	148.609	534.439	1424.95	188.18	3.91779	846.771	82.9232	1282.85	754.883	1072.88	271.84	3129.62	294.896	153.159	63.3005	0	41.555	1494.07	237.467	217.732	373.086	932.65	0	16.6114	353.965	157.323	1152.84	0	1326.46	231.009	229.058	96.82	0	566.134	0	334.615	1274.52	0	TBI 96 hr -7
			TBI 96 hr -8	0	18778.1	119.364	497.614	1205.96	105.634	29.7834	943.808	87.0207	1372.24	530.518	793.042	184.681	2875.62	368.939	189.308	39.5043	0	0	0	317.794	2617.39	445.377	862.912	0	0	0	0	1027.76	0	1142.45	217.66	33.7362	0	0	423.303	0	174.812	977.671	0	TBI 96 hr -8
			TBI day 7-1	0	13003.1	1276.49	247.456	119.611	81.2166	14.6406	1154.98	169.489	615.548	1884.41	753.824	168.948	3206.27	327.982	126.143	5.9424	2.58432	70.4149	604.159	613.025	2900.72	1147.53	1585.06	2140.3	247.556	457.447	262.972	1076.7	14.909	902.333	300.852	340.835	281.777	2203.19	401.203	50.6604	1123.68	1278.32	200.497	TBI day 7-1
			TBI day 7-2	101.007	20721.7	832.234	1671.97	244.689	71.2908	31.5583	1933.78	451.038	548.51	2593.44	591.449	368.68	4376.14	653.367	120.772	27.9497	4.21579	371.735	5445.03	724.194	14453.1	1787.85	1859.06	13684.5	385.424	1532.72	700.449	1045.86	31.7232	1232.96	797.877	349.543	36.5679	2284.01	601.835	179.41	1748.96	1828.66	450.323	TBI day 7-2
			TBI day 7-3	22.4813	13576.6	0	794.832	83.0539	0	26.953	1453.86	120.059	469.262	3315	654.048	275.653	4323.5	448.809	117.873	30.0344	2.34296	233.828	1636.37	659.481	7044.99	871.207	1801.13	2373.6	191.531	742.415	152.056	921.589	26.7412	870.043	895.292	391.906	320.096	2148.19	464.167	131.514	1320.36	1766.43	224.938	TBI day 7-3
			TBI day 7-4	0	11320.5	482.209	1458.77	655.95	0	28.0865	1251.35	339.871	654.638	3659.05	478.151	357.742	4686.25	678.326	166.332	8.75287	2.17168	274.475	2246.24	858.552	9198.24	2265.18	2236.77	7476.25	372.522	1921.77	286.078	1444.02	45.8691	1453.41	928.877	454.196	505.141	2865.53	612.042	198.671	1219.62	1699.04	409.903	TBI day 7-4
			TBI day 7-5	0	42204.1	0	277.056	1012.61	164.62	33.8379	1395.95	9.13216	1296.86	836.095	1605.69	487.865	3631.22	478.138	248.371	76.6812	1.26067	29.0377	2875.11	356.179	3193.36	639.95	1127.63	3108.6	146.549	0	127.866	1526.3	0	2112.46	428.733	154.381	104.979	0	565.398	32.0377	310.188	1420.96	187.962	TBI day 7-5
			TBI day 7-6	0	14762.6	96.9235	0	721.315	97.8757	27.498	956.008	148.895	1128.69	582.658	402.494	281.65	3086.11	389.453	147.183	29.0322	2.14164	0	194.482	305.65	27.4381	451.643	968.931	0	26.249	0	141.598	1111.7	0	1418.4	178.566	138.105	0	0	632.112	0	410.027	1649.77	63.6639	TBI day 7-6
			TBI day 7-7	0	20498.6	255.292	205.649	1217.25	191.371	11.7693	905.891	73.9194	967.47	824.195	966.82	307.907	3086.94	281.505	148.947	56.0638	1.27397	0	0	339.963	0	388.99	990.437	0	12.7611	0	185.223	778.951	11.9153	965.83	236.044	116.232	0	0	449.21	0	141.809	1323.89	31.6607	TBI day 7-7
			TBI day 7-8	0	50598.9	0	190.098	343.116	0	59.0838	874.116	184.361	560.025	769.139	68.6563	132.728	2732.64	982.863	101.651	37.5683	0	0	0	207.953	0	0	856.504	0	0	0	0	230.992	0	1040.69	48.8027	186.72	0	0	170.948	0	88.0847	936.095	0	TBI day 7-8
			TBI day 7-9	0	36020.2	0	4.52994	1473.27	196.323	12.131	1289.39	142.214	1355.77	680.239	1750.15	298.006	3688	247.454	167.604	55.9737	13.6308	240.516	837.497	382.358	727.067	435.261	1159.31	8519.06	63.8232	0	237.038	1174.56	11.5489	1421.5	234.53	167.406	0	0	389.6	0	187.879	1557.24	134.874	TBI day 7-9
			TBI day 7-10	0	24688.5	0	631.727	1735.97	157.839	13.0783	779.752	86.9806	1353.08	535.593	1207.9	173.044	2991.36	146.24	173.426	68.0107	4.36489	106.475	0	337.54	0	575.979	999.652	0	48.5673	0	51.2799	1365.72	0	930.024	376.101	220.62	67.5056	0	404.683	0	81.3903	1194.83	0	TBI day 7-10
			TBI day 7-11	0	30816.6	0	69.737	329.772	315.701	5.2929	1011.7	63.1783	805.057	228.176	674.224	170.838	3373.24	227.702	221.993	112.948	3.80115	0	0	326.999	3240.18	44.1204	1025.24	1004.87	0	0	97.6755	1113.89	0	1376.76	138.658	96.6359	143.921	0	400.243	0	75.0456	1619.67	65.6954	TBI day 7-11
			TBI day 7-12	0	25437.5	0	0	2079.18	330.269	14.2646	1146.05	281.464	1267.82	838.433	1203.98	372.546	4262.4	276.497	203.744	68.3114	1.17382	58.745	1992.29	323.806	337.318	374.35	1187.44	5301.26	51.2135	0	375.569	1645.28	8.3691	1427.97	245.705	162.206	284.09	0	458.271	65.1372	216.286	1420.73	47.6832	TBI day 7-12
			TBI day 14-1	34.9712	34685.1	632.159	1096.78	740.691	54.8744	17.6943	1508.16	124.159	860.46	2349.59	1117.38	411.727	3850.12	590.28	256.33	10.8034	14.4207	35.5758	581.129	590.73	0	969.286	1832.74	9047.99	125.797	285.025	249.176	1461.89	24.9698	1853.2	626.434	165.919	233.878	1360.63	819.793	24.5643	2129.59	1969.82	295.963	TBI day 14-1
			TBI day 14-2	0	22204.6	869.511	0	403.312	73.3253	13.6223	1297.03	154.942	414.107	1747.52	322.053	290.898	3469.64	349.398	135.849	10.9641	0.866577	7.88603	516.825	499.832	0	709.459	1531	3204.75	291.294	142.365	310.074	1280.01	11.5824	1406.91	752.228	207.617	84.9176	491.465	443.327	38.9867	1008.04	1177.04	205.459	TBI day 14-2
			TBI day 14-3	1.23771	10270.8	428.968	0	323.335	49.4638	10.7139	970.027	161.827	325.113	2201.61	335.387	176.604	3478.56	287.238	91.3221	0	6.66698	0	93.4948	350.058	0	1101.02	1266.74	266.917	200.542	86.8925	234.789	766.547	22.9844	824.117	658.03	252.953	154.096	1722.58	633.864	0	1779.76	1773.05	60.3159	TBI day 14-3
			TBI day 14-4	0	13914.6	865.223	819.054	201.115	167.57	6.26234	978.562	222.443	266.3	1300.42	555.712	161.21	3227.53	296.935	76.8892	9.69733	5.64908	0	2097.11	413.901	0	726.048	1191.82	3335.36	65.9932	467.348	251.742	447.724	17.4051	573.149	203.627	255.796	318.971	73.8601	227.156	131.961	524.825	1821.77	156.173	TBI day 14-4
			TBI day 14-5	0	23089.1	0	0	1255.29	34.762	19.6873	619.433	185.217	1327.4	1081.9	774.016	256.308	3320.44	310.831	141.665	68.7253	3.10847	207.542	15.7763	361.433	5959.44	263.572	1122.7	0	4.83272	362.371	158.123	1088.67	8.3128	1540.23	859.831	139.4	208.303	0	540.648	0	68.1079	1004.52	65.3826	TBI day 14-5
			TBI day 14-6	0	15065.8	60.8988	0	869.874	198.76	4.73048	724.081	166.897	1355.78	840.75	704.485	384.435	3184.71	259.539	182.881	67.8938	0	177.778	196.83	332.358	2132.01	542.617	1063.56	0	40.4656	0	0	1204.75	0	1108.57	223.733	174.132	59.2019	0	425.705	0	71.3711	1464.4	0	TBI day 14-6
			TBI day 14-7	0	23960.5	230.118	0	1167.67	193.018	17.5259	1126.95	44.3425	1116.6	910.18	1701.33	419.362	3530.19	249.817	158.402	108.031	1.2253	16.6681	0	280.39	1461.53	384.121	871.21	0	0	21.0055	0	771.467	10.0368	1056.15	66.6113	271.004	0	0	562.951	37.017	216.968	1268.84	0	TBI day 14-7
			TBI day 14-8	0	21547.2	226.88	797.705	873.211	248.257	17.6886	762.304	252.375	1461.41	632.254	1431.19	279.74	3661.29	203.795	150.611	112.808	5.17294	109.265	0	409.003	94.4115	463.199	1021.11	0	53.5571	0	123.854	955.735	9.91946	1085.87	334.518	169.529	82.3659	0	598.48	0	261.089	1061.89	0	TBI day 14-8
			TBI day 14-9	0	25306.7	0	0	1540.56	115.355	12.9572	847.654	64.0754	1363.38	893.13	1528.53	200.574	3394.94	216.51	126.038	54.5291	3.85617	0	0	377.225	0	351.003	867.857	0	0	0	0.0355756	832.405	13.9095	1356.99	460.281	191.471	85.0248	0	374.964	12.9508	130.764	977.703	0	TBI day 14-9
			TBI day 14-10	0	18201.6	236.878	226.066	556.271	218.477	8.73528	650.858	108.622	1253.14	497.093	954.873	233.275	2989.82	101.521	148.59	64.9057	1.50191	0	0	323.123	0	342.6	858.189	0	0	0	0	996.151	0	1017.86	304.244	235.621	275.987	0	388.702	0	108.091	1246.94	0	TBI day 14-10
			TBI day 14-11	0	23307.7	0	54.3612	924.962	250.13	3.26837	725.243	254.26	1195.07	584.257	1077.94	238.178	2942.72	124.262	135.164	46.0926	4.33062	0	372.026	371.098	0	302.193	919.523	0	39.1137	2.17485	185.072	1351.06	0	1363.74	537.624	388.283	76.2621	0	393.848	5.71631	278.723	1513.64	92.5211	TBI day 14-11
			TBI day 14-12	0	18288.2	59.3212	876.93	608.88	128.295	10.438	568.023	0	1503.57	851.459	1122.58	316.399	3486.61	218.148	162.021	78.2398	2.13528	101.642	2368.05	352.904	60.658	724.335	1143.86	0	37.9411	347.832	22.9381	1276.51	0	1122.84	281.576	263.389	422.136	0	355.4	0	261.02	1314.66	15.5323	TBI day 14-12
			TBI day 30-1	0	25002.8	742.929	1716.74	200.575	154.538	19.3885	1004.34	165.664	414.535	1743.47	643.965	174.901	3305.22	313.258	117.3	3.94927	4.64449	0	1739.14	355.243	0	770.472	1226.66	2211.66	127.938	43.7626	239.398	895.842	24.144	1186.33	489.711	222.471	120.631	1012.95	488.599	8.87427	623.03	1641.98	63.4251	TBI day 30-1
			TBI day 30-2	108.484	26741.1	1219.9	6473.12	1820.15	193.817	42.9556	756.754	170.426	845.638	1606.82	525.716	417.077	2918.25	174.531	133.164	24.709	6.73411	375.206	3900.87	692.025	29096.2	983.607	1320.75	5217.06	30.368	205.818	793.236	1236.33	10.0987	1261.7	371.927	245.105	953.107	193.15	489.543	97.5054	683.482	2070.97	434.677	TBI day 30-2
			TBI day 30-3	4.29319	39480	1110.82	3392.3	1107.64	263.261	17.9185	1158.82	108.71	703.008	1525.5	1063.15	202.74	3228.44	371.887	149.555	0	4.06248	81.3311	1088.78	463.246	4458.32	788.426	1460.82	4679.6	190.874	365.541	249.036	1926.86	20.8255	1400.49	441.42	80.3309	278.715	937.656	481.058	107.483	982.641	1476.89	124.599	TBI day 30-3
			TBI day 30-4	0	23844.2	918.095	1194.49	1279.62	312.689	0	790.624	144.9	819.518	1659.5	766.049	312.884	3430.49	211.568	134.949	1.31878	9.90617	123.822	2324.35	574.601	1651.39	1171.58	1582.16	0	96.8479	195.291	610.476	2071.69	32.4365	1075.76	514.947	239.929	439.843	1051.03	608.807	37.4857	1114.04	1813.08	290.652	TBI day 30-4
			CYT-7 antibody array
			LOD	9.06597	4.3157	5.95757	0.298331	13.3048	22.2048	10.4877	167.789	338.82	214.57	11.7911	93.4046	549.537	67.5523	19.1256	356.979	2.40573	5.8403	115.515	15.9901	0.988376	17.2431	5.77049	80.4472	10.8613	70.3267	24.1924	46.8513	137.911	6.99648	9.0439	5.11396	0.466051	135.816	36.6906	23.7237	54.0268	89.3498	73.6869	66.4428	LOD
			MAX	4000	1000	2000	1000	40000	2000	1000	100000	100000	200000	2000	100000	40000	20000	20000	100000	2000	4000	40000	4000	1000	100000	4000	20000	2000	40000	10000	40000	10000	4000	4000	4000	1000	100000	100000	40000	40000	100000	10000	100000	MAX
			Protein name	B7-1	BAFF R	BTC	C5a	CCL6	CD48	CD6	Chemerin	Clusterin	Lungkine	Cystatin C	DAN	DLL4	EDAR	Endocan	Fetuin A	H60	IL-33	IL-7 Ra	Kremen-1	Limitin	Lipocalin-2	LOX-1	Marapsin	MBL-2	Meteorin	Nope	NOV	Osteoactivin	OX40 Ligand	P-Cadherin	Periostin	PlGF-2	Progranulin	Prostasin	Renin 1	Testican 3	TIM-1	TRAIL	Tryptase e	Protein name
			sham -1	75.9971	9.89164	18.243	2.06786	68.1345	3.82353	16.7603	2887.44	24370	308.081	1849.98	546.629	1281.03	0	17.5155	1092.41	25.1095	45.3927	430.755	158.154	11.8517	453.045	0	996.199	87.8885	273.004	2833.54	2237.83	1350.45	25.6465	34.5111	153.468	5.66114	798.3	0	158.686	5808.12	14.1976	234.79	340.122	sham -1
			sham -2	182.975	16.2363	2.61393	3.21794	16.9172	12.003	24.6998	1830.33	20657.7	270.262	1707.19	279.86	587.411	0	4.57454	287.985	19.15	5.26448	350.735	2.58568	8.87863	1367.97	0	897.634	77.4506	332.776	3381.94	1938.42	1299.92	23.2287	0	187.211	5.08261	473.778	0	299.951	6659.81	5.47921	191.112	87.2416	sham -2
			sham -3	105.752	9.9729	14.3815	2.92091	17.7253	17.1688	0	1811.29	21333.4	308.24	1859.22	332.977	265.485	4386.77	0	996.774	29.481	0	902.264	85.6984	5.31245	1982.77	0	1748.46	113.474	50.7371	1295.63	1900.56	701.987	54.8385	3.45796	129.427	4.16056	487.944	0	82.8587	1158.87	4.98152	83.0276	116.116	sham -3
			sham -4	124.53	11.5396	6.12792	2.86564	14.2619	24.5337	117.31	1329.41	22220.4	223.059	1875.7	321.36	505.785	12.3024	13.4152	1324.78	12.1675	3.19822	1352.39	0	9.44244	1736	0	1045.45	117.65	336.413	2722.32	1399.81	1217.35	32.3734	175.963	133.557	14.0381	547.169	0	28.5606	3079.61	7.34032	217.161	34.161	sham -4
			sham -5	48.5611	10.6026	11.7721	3.09253	27.8151	32.4814	107.1	436.642	22780.4	171.498	1857.2	235.042	217.925	2942.09	19.625	0	36.6891	0	529.324	16.7295	7.86158	947.906	0	819.886	187.245	0	1812.66	2808.05	1062.17	6.22658	37.7131	159.967	14.1172	476.412	0	84.2046	1602.78	13.1444	101.842	189.595	sham -5
			sham -6	0	16.6788	13.6426	0.318454	14.7536	9.13597	0	998.388	22988	175.644	2063.41	268.878	71.6146	1274.79	1.14456	0	36.4519	45.6208	528.123	108.41	10.2495	610.598	0	860.716	138.42	118.635	2045.3	1639.91	1143.16	11.6472	0	161.305	19.1581	378.597	0	138.478	3057.13	9.60685	187.829	97.5209	sham -6
			sham -7	148.981	21.6571	23.8673	3.65189	67.7166	28.1139	74.3278	1733.94	21869.4	230.604	1782.57	452.537	439.993	0	14.1163	146.666	25.3041	62.0094	119.833	47.9734	12.0913	540.154	0	481.03	97.3049	91.2734	2272.77	2498.33	968.17	26.6193	0	115.301	7.02508	685.643	1792.93	87.3413	4099.92	21.5647	186.423	157.235	sham -7
			sham -8	138.845	20.5487	22.04	3.24915	78.4017	29.2358	0	2373.37	25916.8	230.573	1916.41	539.477	647.796	0	12.1182	558.466	26.7141	59.1196	325.799	82.0044	14.3902	480.996	0	693.913	87.1677	62.9512	2747.86	2419.17	1059.67	36.8117	0	113.656	2.39465	654.524	0	0	5149.99	18.643	213.362	175.134	sham -8
			sham -9	80.6031	24.5279	29.8411	1.8358	65.2663	22.3752	67.1601	5138.68	25966.4	364.661	1871.49	557.556	820.649	0	2.65011	1534.45	6.28531	0	451.97	46.6838	13.4315	914.459	0	787.829	91.8915	270.424	2609.2	2276.48	1102.04	32.1132	0	168.775	34.996	823.597	0	77.3703	7473.36	25.3267	362.333	257.527	sham -9
			sham -10	139.928	23.646	23.0518	2.47521	38.9982	34.8504	0	3421.93	26931.5	190.258	1738.3	466.896	515.842	0	8.70643	940.181	55.0544	29.8668	251.208	85.7911	17.156	448.641	0	860.938	82.8665	0	2438.41	2388.28	973.938	32.1918	471.646	154.207	13.1675	589.155	0	23.5346	7201.57	13.7644	365.445	147.761	sham -10
			sham -11	525.49	46.3834	31.1313	6.54756	64.7863	119.134	255.738	2180.59	27484.2	170.305	2395.6	311.133	987.649	12984.1	26.8244	2112.44	97.0205	94.9203	1250.44	370.46	19.5539	413.245	0	748.631	120.009	187.404	2967.7	1811.23	1931.11	25.9439	250.179	95.361	49.2665	644.361	608.419	280.236	6121.52	13.7299	246.548	298.162	sham -11
			sham -12	195.493	39.2555	24.4878	3.61873	61.5742	64.4859	261.382	2440.25	31932.9	203.987	2309.88	423.732	1162.93	9036.53	35.7977	2406.49	66.3925	95.0419	1410.13	249.612	25.4183	607.751	0	1696.07	214.559	432.341	3537.36	2734.62	2771.87	68.6691	564.142	188.252	19.2256	864.457	10728.1	453.124	5836.85	18.6374	215.058	354.632	sham -12
			sham -13	294.619	34.4943	25.3096	4.54833	55.9894	58.2931	156.251	2372.2	33723	197.347	2361.29	426.664	1559.47	0	26.5248	1761.08	50.8925	72.5838	718.128	315.477	21.5839	1388.01	0	759.036	121.522	317.474	2940.83	1779.07	1977.28	54.9227	293.245	104.17	10.6445	821.859	0	255.252	5852.38	19.6239	372.045	471.474	sham -13
			sham -14	307.336	45.1931	35.2379	5.41161	79.8244	76.1068	724.73	2485.41	42031.3	234.724	2423.44	539.763	1955.55	1111.37	49.6656	2605.8	83.6569	58.7273	849.843	289.887	22.9424	3163.75	0	1111.52	198.133	179.766	3846.94	2345.64	1941.62	36.8353	511.407	134.983	8.08595	1069.07	0	527.187	6667.85	26.0317	319.282	511.301	sham -14
			sham -15	379.623	47.7295	24.3692	5.02084	55.8102	136.836	273.357	1674.25	33684.6	265.152	2206.11	619.768	1835.73	5820.03	39.5529	428.585	47.0338	66.3968	1171.86	192.456	22.3438	787.556	0	1246.79	168.908	387.258	2475.63	1831.91	2013.18	99.7535	0	136.722	13.0617	1041.91	0	131.152	3778.21	29.5391	400.612	623.553	sham -15
			sham -16	325.69	44.5354	29.5554	4.08674	77.3534	73.2943	318.401	1471.72	31728.8	186.648	2120.52	603.05	1771.86	926.604	38.2543	1452.08	63.2543	64.6501	776.863	145.213	22.7964	1234.68	0	1639.21	136.332	0	2530.5	2277.7	1771.77	69.4803	41.1796	60.8394	6.98497	997.906	33258.3	304.16	4517.11	16.4346	195.584	498.877	sham -16
			sham -17	252.519	17.272	31.8205	4.87478	66.5641	96.8788	360.972	2726.59	35545.7	243.641	2053.12	546.124	1568.24	1192.31	52.499	2557.82	34.4012	122.039	1040.66	172.938	23.7007	977.177	0	936.433	223.543	223.357	3532.05	2427.74	2355.25	50.8472	135.626	129.986	6.39985	871.231	1428.56	32.5952	7025.23	28.5649	237.245	482.831	sham -17
			sham -18	202.208	27.7833	26.9627	3.56131	93.4728	73.684	287.877	2858.14	43948.1	232.131	2227.21	540.144	1318.8	0	41.9877	2719.38	37.7175	99.7989	997.014	158.165	25.9796	1329.38	0	1501.62	230.629	29.9147	3408.48	2845.19	1930.3	59.8496	499.321	126.376	6.10096	899.167	10111	134.71	6730.06	23.8038	269.155	462.722	sham -18
			TBI 8 hr -1	139.315	21.9974	29.1974	2.7119	71.7055	22.5251	1.73978	2050.27	25919.5	344.169	1710.12	539.13	892.08	0	23.8583	216.232	0	0	298.204	0	13.9277	731.109	0	916.038	95.0756	0	2468.33	2169.97	1287.85	47.028	202.983	127.828	3.00027	830.735	0	92.2713	5664.7	34.4761	377.704	269.632	TBI 8 hr -1
			TBI 8 hr -2	147.312	21.4427	23.4221	1.85115	51.9255	28.9339	0	2609.65	26281.4	276.925	1795.73	519.166	600.455	0	15.2544	582.367	22.1114	29.3918	549.138	188.657	10.2915	570.616	0	941.918	134.22	148.655	2632.58	2435.63	1320.62	19.4782	0	148.77	4.91415	710.914	0	68.1133	5689.66	20.2638	227.958	145.167	TBI 8 hr -2
			TBI 8 hr -3	115.59	22.9366	17.9421	2.50508	41.1184	24.1832	26.7458	2583.69	18673	455.552	1603.61	568.882	761.013	0	1.89791	761.643	10.0534	0	755.116	0	12.3735	2139.43	0	780.445	113.793	80.4829	2080.22	1711.6	1057.13	36.006	0	160.899	5.30677	803.53	7289.74	36.9468	4956.93	32.1578	310.059	367.999	TBI 8 hr -3
			TBI 8 hr -4	141.132	17.0007	26.5949	4.11331	69.2525	24.4678	92.8522	2041.06	25477.3	337.958	1874.41	539.524	718.159	0	22.2966	139.398	0	47.7967	511.726	5.77481	9.09671	885.322	0	961.523	119.77	347.667	2273.54	1858.95	1209.04	27.8384	222.224	224.686	1.83907	859.649	3707.57	540.578	4514.97	21.9374	322.262	303.695	TBI 8 hr -4
			TBI 8 hr -5	257.902	38.3745	35.1351	3.61884	40.1573	67.8486	504.103	4386.18	37479.1	333.747	2091.95	610.706	1780.27	14543.5	70.6121	3738.5	40.3008	147.45	452.425	208.926	27.7831	924.097	0	827.499	268.809	299.056	4070.49	2725.93	2271.35	39.1582	222.142	137.934	9.32528	845.99	1959.49	19.2926	8510.37	23.5858	113.333	253.136	TBI 8 hr -5
			TBI 8 hr -6	274.827	37.3881	33.3252	5.8919	72.0108	57.558	174.066	3864.24	38763.2	152.6	2277.84	490.042	1287.73	0	37.314	3934.89	66.2439	111.91	797.409	110.107	25.2689	896.392	0	969.642	338.966	204.735	3469.72	2590.99	1937.42	35.6697	22.7175	120.758	4.69248	748.88	0	155.579	9034.51	18.1915	521.142	378.848	TBI 8 hr -6
			TBI 8 hr -7	308.095	44.7918	49.0157	5.09724	83.5624	68.1758	463.056	4315.92	39912.1	280.176	2167.62	570.959	2136.19	260.254	57.7052	3277.25	36.2634	172.983	660.578	264.035	24.0391	1241.58	0	1495.61	134.12	162.631	3485.2	2741.95	1839.28	60.0148	193.97	149.934	33.1443	926.458	553.097	333.889	7859.25	17.7233	74.6925	292.139	TBI 8 hr -7
			TBI 8 hr -8	212.254	32.4481	33.2516	4.19474	46.7109	62.362	499.509	3179.11	33139.9	242.585	2113.15	546.162	1556.33	0	52.7026	2437.76	25.6584	160.725	413.972	74.1704	24.7304	1160.93	0	1039.25	251.928	197.858	3452.54	2334.16	2197.4	45.8391	200.958	83.4812	2.59122	878.034	13748.2	0	6989.64	29.725	232.692	546.471	TBI 8 hr -8
			TBI 8 hr -9	261.523	23.2397	34.7573	4.75721	54.4743	109.03	431.533	2523.14	40790.1	195.473	2096.73	546.43	1793.84	1572.98	68.8727	2209.35	49.0066	216.43	660.42	502.893	16.7705	1755.75	0	1035.52	220.175	17.9602	3535.61	2548.82	1561.15	54.0907	33.3134	97.4513	27.4788	875.928	7493.84	196.464	7329.24	34.504	130.104	466.753	TBI 8 hr -9
			TBI 8 hr -10	237.613	43.4641	36.6893	4.28434	71.5299	32.9348	330.564	3695.51	32134	245.97	2064.81	531.48	1204.36	0	44.1845	2107.95	15.3988	76.5743	583.243	209.909	15.0479	1081.11	0	903.604	251.727	136.862	2890.27	2281.52	1328.31	20.6188	550.233	70.768	10.4012	819.442	0	60.4458	6776.13	29.2407	203.535	333.265	TBI 8 hr -10
			TBI 8 hr -11	306.72	39.2732	27.9483	4.42579	69.5785	48.5357	260.044	4026.04	37452.8	377.938	1959.49	661.574	1778.66	0	56.8369	2645.91	43.164	94.2898	1940.8	63.1606	18.7162	1104.66	0	1175.73	177.395	92.7743	4047.34	2158.55	2380.59	75.3595	590.448	158.609	3.83717	971.495	21030.5	280.962	8512.07	32.3561	191.456	493.558	TBI 8 hr -11
			TBI 8 hr -12	446.88	63.7872	24.0301	4.91481	86.5012	78.2544	83.6836	695.487	39922.4	175.194	1956.04	527.442	1223.17	876.47	44.8519	879.491	9.65161	142.615	694.499	163.197	17.9755	1835.65	0	1248.11	282.181	0	3783.43	2289.52	1819.5	73.8862	0	160.638	0	911.428	3194.76	214.87	6913.3	30.1849	104.15	434.171	TBI 8 hr -12
			TBI 24 hr -1	12.9515	12.0533	18.9663	0.954217	46.2596	43.719	0	857.762	20563.5	288.197	1802.71	453.392	483.962	0	9.7411	0	4.24939	0	430.317	45.3327	4.788	2365.78	0	291.123	114.991	0	1779.36	1397.74	840.07	2.58622	0	129.468	3.14653	664.909	72.5027	14.869	1269.58	19.5904	161.47	121.068	TBI 24 hr -1
			TBI 24 hr -2	109.554	24.6091	19.3991	1.99461	42.419	29.2991	0	597.496	25601.2	425.786	1871.18	524.632	826.878	0	26.7793	0	11.2057	17.2408	8.46	126.664	6.62119	538.712	0	511.761	108.15	0	1850.44	1646.77	795.587	18.2654	62.059	95.9335	6.69131	783.635	0	109.165	1766.45	18.5599	210.343	210.487	TBI 24 hr -2
			TBI 24 hr -3	61.0516	17.0285	16.4395	2.99644	48.3825	32.2823	128.98	652.692	26315.1	263.429	1792.37	483.094	693.974	0	18.9881	0	46.5886	0	534.885	92.7539	5.22145	2222.69	0	395.842	97.292	0	1285.54	1119.93	853.78	28.4122	0	117.79	13.61	717.93	0	30.2624	1103.72	19.2272	154.462	164.63	TBI 24 hr -3
			TBI 24 hr -4	29.4979	15.5862	22.7968	1.50392	29.7387	15.6209	0	902.988	26956.6	289.443	1841.2	471.657	509.992	0	23.0613	0	9.92542	0	143.054	63.0923	8.20592	742.028	0	714.291	117.73	0	2556.7	2056.98	719.187	34.6212	0	113.983	8.29041	804.85	0	178.384	2846.29	11.8401	93.0994	53.8159	TBI 24 hr -4
			TBI 24 hr -5	279.11	40.6467	18.172	4.31422	42.9507	78.8609	266.826	943.038	39745.8	283.417	1958.57	489.036	1284.31	169.26	39.603	916.087	33.8578	87.1532	908.292	150.463	14.2853	957.798	0	1487.35	148.783	0	3125.15	2595.11	1857.41	59.9592	451.053	90.1618	7.15068	910.469	7847.61	197.614	4382.01	15.6364	190.585	516.508	TBI 24 hr -5
			TBI 24 hr -6	392.68	66.8737	32.9036	3.89133	47.2449	82.2278	237.244	1280	36200.9	406.949	1952.42	731.674	1543.27	0	33.8809	1341.84	19.0289	141.897	931.326	296.467	20.1292	1155.41	0	1368.98	148.976	0	3494.78	2332.78	1631.08	58.8205	71.047	140.138	0.130648	1157.01	22033.9	236.613	6247.71	28.4211	264.715	709.494	TBI 24 hr -6
			TBI 24 hr -7	375.126	50.2471	17.3466	3.37085	50.9608	65.2722	302.231	1339.53	34102.4	282.609	1668.36	550.112	1601.23	0	44.8597	703.437	24.5846	19.374	856.263	291.263	19.68	1344.2	0	1287.86	199.603	0	3156.22	2402.85	1821.5	71.3476	503.747	141.971	10.6204	1027.11	14412.7	368.002	5558.33	31.0754	222.35	636.112	TBI 24 hr -7
			TBI 24 hr -8	253.442	48.5722	33.624	4.32142	46.6346	98.0316	251.909	1003.9	35210.6	270.793	1982.73	611.464	1427.83	0	41.3589	744.064	32.9356	10.1253	629.411	33.671	13.5514	899.846	0	1464.19	189.474	0	3401.29	1853.56	1841.1	69.3019	0	103.081	5.9561	958.111	0	608.308	3660.5	18.9377	296.914	525.529	TBI 24 hr -8
			TBI 24 hr -9	406.967	42.5587	20.108	7.19819	64.3134	89.486	336.148	2529.65	34125.4	405.146	1957.83	622.233	1697.93	0	35.2603	2054.77	43.1334	98.2568	1148.99	105.863	15.9292	1175.43	0	1130.08	241.19	0	2795.42	2209.49	1909.48	75.3207	316.196	109.021	18.6468	943.337	8475.68	278.604	7089.25	24.0905	427.293	557.744	TBI 24 hr -9
			TBI 24 hr -10	263.049	38.0665	32.9672	4.51082	68.9281	125.711	390.309	1874.94	34762.1	355.361	1991.9	543.135	1155.82	0	39.3742	1422.85	10.0825	24.0648	683.3	99.0598	14.9065	575.78	0	1404.93	149.569	96.1717	2957.62	2311.49	1674.87	57.0543	252.722	116.584	9.68963	865.878	1152.3	216.001	4573.44	12.4338	330.122	460.897	TBI 24 hr -10
			TBI 24 hr -11	986.548	91.9322	42.2241	10.824	83.0553	192.689	532.749	859.753	38293.7	285.765	2051.13	299.644	1632.62	16095.6	4.25744	1802.48	108.347	28.9805	1047.33	767.141	14.2772	479.407	0	1385.27	241.362	171.598	4024.61	2630.19	2336.86	54.7616	469.704	230.878	41.6366	658.459	189354	680.919	13989.9	18.2526	585.952	338.148	TBI 24 hr -11
			TBI 24 hr -12	1095.35	143.01	56.4269	10.7248	121.661	359.122	594.031	919.13	40379.6	266.924	2033.22	323.545	1485.69	12206.5	1.51993	901.892	123.644	59.734	433.536	212.634	14.3303	853.354	0	1249.41	239.007	0	4251.84	2694.57	1433.52	61.5876	352.305	108.404	14.54	741.99	26278.6	334.042	11986.4	16.0771	201.069	394.334	TBI 24 hr -12
			TBI 48 hr -1	1343.06	112.288	44.8667	11.8952	85.5773	221.688	819.601	1497.93	44310.3	306.756	1789.15	352.832	1555.3	0	15.859	1858.2	10.7765	64.8503	92.8022	53.0673	15.4697	1350.24	0	1141.8	252.196	0	4251.74	3057.6	1554.58	63.6739	731.743	133.35	27.7375	1048.02	0	303.504	8935.28	25.1657	490.804	528.579	TBI 48 hr -1
			TBI 48 hr -2	512.638	55.3399	13.969	6.40357	64.2167	122.457	218.56	653.312	38390.9	146.978	2146.52	386.729	867.962	4910.16	10.6543	0	39.1827	14.5463	0	31.8278	11.4064	1399.25	0	667.925	199.129	0	2983.13	2876.97	1359.89	43.8354	0	112.394	7.67385	715.447	0	97.3905	3252.71	20.0037	2.55371	422.985	TBI 48 hr -2
			TBI 48 hr -3	352.498	29.1966	24.4892	4.39844	29.6172	82.5008	624.995	1048.75	38260.1	214.931	1417.23	515.267	1399.54	22675.5	61.5862	2959.61	31.9151	108.28	1856.33	178.635	17.3064	2357.45	85.1623	2221.2	212.963	684.914	2437.58	3437.37	1936.27	123.258	1512.8	195.143	52.2408	957.528	25884.3	496.031	3027.97	29.1922	92.0552	569.276	TBI 48 hr -3
			TBI 48 hr -4	557.295	61.8497	24.6998	5.92849	67.878	173.267	63.3334	615.916	47572.6	180.9	2119.8	623.479	1435.74	9075.76	42.5755	1179.16	55.6886	195.265	283.738	209.024	19.8097	1080.28	0	1646.51	191.413	317.308	2942.44	2199.84	1794.14	80.7267	208.873	111.51	44.7786	1076.43	10390.8	925.055	2632.06	44.3621	170.497	115.724	TBI 48 hr -4
			TBI 48 hr -5	184.293	35.4712	32.9001	4.81446	68.6889	78.7873	94.4316	2297.37	33029.9	134.123	2071.08	439.704	885.528	498.925	44.1491	2139.73	50.2694	121.398	853.668	281.786	14.4711	1689.22	0	1006.86	132.474	150.579	2914.42	2218.4	1716.84	35.7374	129.984	64.7477	3.84257	767.089	140.815	149.918	5568.41	14.7077	261.249	401.978	TBI 48 hr -5
			TBI 48 hr -6	134.995	41.0094	30.4686	3.83798	34.8042	98.6725	303.008	1897.73	38050.5	243.404	2259.17	601.747	1117.45	6843.85	58.2657	2071.72	27.7039	100.051	1329.98	131.689	18.6161	1872.97	0	1114.69	179.149	0	2984.32	3021.22	1686.38	52.2951	138.794	165.809	6.13199	1019.87	2605.83	330.112	4902.24	22.7315	293.036	508.952	TBI 48 hr -6
			TBI 48 hr -7	212.317	50.6504	29.4568	4.55744	62.2349	107.451	133.211	3529.35	37435.4	312.776	2097.62	504.515	1383.19	3100.31	49.9317	2698.36	31.797	99.4697	366.271	89.2948	16.6955	757.435	0	1533.34	248.832	0	4115.59	2127.74	1629.51	80.0108	161.414	100.137	7.34946	843.52	0	401.836	7619.65	24.3114	292.284	498.744	TBI 48 hr -7
			TBI 48 hr -8	87.4694	29.1589	36.9625	4.87949	41.4212	88.4236	21.5242	0	40477.6	228.021	2058.08	455.68	1462.26	717.746	43.2298	260.893	8.9724	37.172	0	97.2068	10.3115	2505.66	0	935.245	354.969	0	3731.9	2529.6	1545.02	59.2266	0	131.145	4.80019	1270.42	0	269.025	2311.18	26.0605	184.614	664.688	TBI 48 hr -8
			TBI 72 hr -1	24.2797	13.9965	18.1605	1.53302	45.7213	42.8398	100.647	102.73	12529.1	210.802	1306.38	297.05	161.005	0	27.4462	0	0	11.4933	0	0	13.1021	840.211	0	748.721	98.0568	0	2526.47	2688.18	1184.58	24.9204	42.3618	208.479	15.1261	717.535	6121.92	51.8825	3141.25	20.5841	245.142	192.583	TBI 72 hr -1
			TBI 72 hr -2	86.5216	14.3329	12.8946	2.49803	18.6276	39.4639	70.5224	1526.79	28600.4	223.288	1926.03	468.76	539.427	0	41.5552	135.404	7.58633	0	326.879	10.9785	10.1695	806.807	0	637.674	132.885	0	2508.32	2340.99	1014.77	11.7643	61.0176	169.509	15.2095	606.076	0	6.44506	5520.1	18.204	180.771	214.385	TBI 72 hr -2
			TBI 72 hr -3	93.8323	32.8578	27.1308	5.15787	81.5177	42.4892	134.158	3519.8	25585.9	300.301	2046.06	580.365	992.806	0	14.7796	1224.76	0	26.7402	552.546	0	15.2461	2425.77	0	1123.42	139.337	227.197	2570.48	2806.89	1301.19	46.5524	78.8915	180.164	11.7799	853.958	11408.2	253.739	7496.21	26.7041	344.02	363.468	TBI 72 hr -3
			TBI 72 hr -4	177.706	24.7747	29.4812	3.1139	56.8962	49.7516	0	2834.42	23846.9	425.816	2070.36	543.725	618.878	0	37.4447	608.827	12.9074	28.4355	680.166	28.2746	15.6424	1150.07	0	1021.43	151.417	298.776	3043.09	2590.75	1171.06	28.9377	59.1238	191.138	2.33579	780.307	1672.36	239.292	5070.69	15.5727	294.021	240.644	TBI 72 hr -4
			TBI 72 hr -5	194.25	43.1229	41.4974	3.91878	68.3402	82.3033	102.436	855.77	33955.8	259.537	1999.45	584.638	1696.65	0	43.69	829.162	23.5906	65.5386	179.387	410.283	14.9033	595.081	0	1279.6	149.657	0	3563.02	1830.19	1856.83	73.7139	0.47519	55.4767	5.78676	1216.31	4479.67	326.708	3311.23	33.3936	282.933	629.081	TBI 72 hr -5
			TBI 72 hr -6	221.626	43.6449	32.003	4.90254	71.7406	126.102	123.263	1575.14	32695.7	288.862	2009.56	504.464	1427.14	0	20.6487	1516.66	13.6711	113.814	0	19.451	15.976	754.97	0	1009.55	155.477	0	3473.96	2423.57	1592.88	71.2801	0	126.075	6.94594	914.937	0	392.07	6727.17	23.3634	399.133	508.95	TBI 72 hr -6
			TBI 72 hr -7	189.989	49.1212	41.8456	5.48507	49.4586	112.532	192.88	1639.32	32577.9	236.831	2011.63	596.479	1515.72	0	51.1571	1498.06	49.6958	96.4297	695.061	306.42	16.2449	606.284	0	1350.27	215.478	25.475	3325.86	2223.09	1981.51	78.4184	111.553	149.344	8.33964	983.842	0	174.556	4782.53	21.7	233.186	574.939	TBI 72 hr -7
			TBI 72 hr -8	171.807	35.6848	34.5344	3.86685	54.0916	100.701	192.187	1205.75	37038.4	246.236	2075.94	566.259	1657.84	962.888	57.4374	1204.71	36.397	80.1434	545.962	178.32	12.4251	2246.14	0	1078.74	194.746	0	3408.19	3029.51	1703.94	69.2162	164.807	98.3533	7.28689	1120.07	1797.02	157.23	3696.29	20.8763	294.648	638.513	TBI 72 hr -8
			TBI 72 hr -9	158.503	26.1653	29.5188	5.53117	64.1056	74.8493	268.816	2783.05	29377.6	211.275	1945.34	545.942	1191.99	2970.54	48.8724	1960.13	50.9901	67.4118	15.2776	452.418	12.3164	989.297	0	1336.56	135.491	190.806	2803.44	2026.99	1545.09	66.126	1605.74	70.3373	8.37644	851.902	2445.12	269.214	3928.07	20.9614	330.006	321.316	TBI 72 hr -9
			TBI 72 hr -10	133.889	32.6194	32.3792	3.25276	50.2933	105.498	254.78	3003.1	25703.7	300.471	1869.01	525.46	1168.83	0	28.9018	1697.94	14.6222	0	957.141	235.816	11.6535	427.062	0	962.27	162.39	1934.25	1896.18	1803.21	1650.16	57.9581	0	43.6191	4.08114	917.871	0	192.097	4237.14	19.126	205.163	451.287	TBI 72 hr -10
			TBI 72 hr -11	116.046	42.945	36.1549	3.03684	63.9392	88.6059	219.994	3432	30234.8	180.584	1828.51	422.36	800.732	2158.37	50.3848	2279.23	40.9687	123.222	0	100.914	16.5524	627.095	0	861.303	149.048	0	2822.84	2406.73	1604.55	56.1389	197.92	113.957	4.09439	733.167	0	191.397	5761.61	17.6377	138.801	326.245	TBI 72 hr -11
			TBI 72 hr -12	146.72	88.035	28.201	5.17515	59.2961	95.2267	0	284.819	33405.3	236.267	1919.18	583.434	1469.76	0	32.078	274.579	15.3233	30.8959	0	30.7458	13.9993	1076.93	0	1083.02	254.61	0	3401.78	2140.64	1290.4	39.2773	650.272	44.6356	0	1058.58	0	95.7316	3801.84	16.0875	151.87	559.878	TBI 72 hr -12
			TBI 96 hr -1	154.348	38.8814	41.1517	4.10171	53.0107	98.838	0	601.676	27929.7	162.582	1984.44	476.348	669.856	2430.98	40.6209	0	20.2915	54.551	432.155	95.1861	15.2021	1258.5	0	1466.5	237.016	0	4398.11	2393.89	1788.26	59.9954	229.31	102.174	16.1071	1253.57	33060.4	282.276	2302	50.0643	419.032	433.971	TBI 96 hr -1
			TBI 96 hr -2	90.3863	43.553	29.6616	5.48962	47.8134	110.727	290.345	3090.69	35426.4	163.686	2103.71	630.169	1176.47	4913.13	48.0258	2064.96	53.2239	69.1918	253.786	315.985	14.3967	1338.39	0	729.21	210.677	224.834	2232.61	2108.42	1360.62	37.6133	322.862	67.8299	3.81488	868.11	2598.56	189.178	4913.45	26.3863	145.633	574.635	TBI 96 hr -2
			TBI 96 hr -3	112.857	34.7153	25.6151	4.01337	61.5266	39.5336	242.964	3456.85	33258.7	283.196	1871.04	548.421	907.029	95.4619	32.9016	1853.93	44.9812	96.8553	824.632	254.643	17.7471	525.062	0	1177.39	174.294	77.0284	3376.81	2483.95	1855.37	56.099	228.079	72.2856	5.00762	798.744	0	211.053	5245.69	14.1456	261.222	502.916	TBI 96 hr -3
			TBI 96 hr -4	133.214	33.0497	20.2911	2.98048	69.0182	74.1127	187.167	2666.96	33226.5	205.034	2041.94	514.2	764.991	0	29.813	1715.75	55.5851	87.2556	1418.09	229.111	20.2382	995.519	0	1240.28	260.632	417.595	3775.71	2984.36	1728.7	60.7568	455.055	194.497	5.88791	825.044	268.728	298.495	5230.56	12.1824	304.474	462.463	TBI 96 hr -4
			TBI 96 hr -5	171.618	41.3907	27.655	3.57335	64.1644	62.0485	202.04	2734.33	27784.8	244.369	1724.03	520.908	1275.5	0	16.8251	1192.87	34.969	52.4884	1043.2	154.909	20.388	545.804	0	1283.07	153.847	0	2484.36	2000.1	1147.02	57.1993	208.023	45.221	9.68248	895.075	0	152.71	4192.02	17.8223	358.124	460.064	TBI 96 hr -5
			TBI 96 hr -6	189.21	29.2248	18.6137	2.38985	63.4412	51.0479	274.948	1233.79	31860.4	228.588	1893.85	617.103	1371.46	0	32.5448	722.226	3.58578	41.9069	1404.12	138.566	17.7065	526.878	0	1311.63	197.62	0	2611.82	1662.83	1283.66	51.9413	56.3197	69.9747	4.1485	1025.91	0	196.349	2659.96	19.4049	345.291	459.229	TBI 96 hr -6
			TBI 96 hr -7	175.992	32.8225	16.2834	3.29905	35.5103	73.7824	220.998	2799.99	28322.2	288.866	1732.86	474.431	1000.94	9065.9	24.4534	1543.5	26.3551	103.123	671.872	161.895	18.4902	422.548	0	1337.61	227.074	0	3139.63	2077.9	1452.6	79.1013	115.53	90.1412	11.836	826.914	0	298.369	5339.57	16.744	390.685	405.656	TBI 96 hr -7
			TBI 96 hr -8	182.893	32.5316	26.2884	3.66451	75.6366	68.2687	156.218	2635.34	31458.7	291.431	1787.53	573.934	1219.16	0	17.2456	1595.18	4.46456	70.4289	1458.16	112.92	19.3684	791.056	0	1121.08	160.744	0	2809.49	2590.82	1413.34	49.8091	304.346	91.6833	3.89605	909.104	0	462.253	5289.98	24.6201	440.692	304.658	TBI 96 hr -8
			TBI day 7-1	156.944	26.1887	26.098	5.49958	29.6843	86.7952	91.9641	1209.98	26976.6	395.978	2022.74	389.482	1051.13	0	17.3746	626.795	1.17753	31.4314	378.888	0	13.6767	1314.46	0	836.646	136.118	115.108	2916.21	1674.94	1067.59	34.1737	0	159.65	8.97398	987.716	0	146.847	3890.4	11.7989	177.808	249.001	TBI day 7-1
			TBI day 7-2	202.288	36.0189	28.4143	3.44654	40.0128	49.9114	79.3449	474.578	25308.2	296.712	1984.41	515.67	957.195	0	5.5065	146.528	0	0	899.863	0	11.3808	1376.27	0	805.821	276.881	0	2594.54	2406.7	1244.8	23.4264	3.19633	332.269	13.3064	983.246	1128.99	121.882	1376.8	16.5835	8.60381	264.367	TBI day 7-2
			TBI day 7-3	154.041	29.077	25.7412	3.92795	39.5501	52.1037	87.5183	702.391	21972.5	366.454	2060.54	343.449	802.589	0	0.356476	0	29.4592	0	191.297	38.0952	7.52606	725.122	0	775.434	110.807	34.3465	2085.04	1742.16	886.695	13.1983	96.4411	89.7542	19.2144	906.236	0	88.4525	1615.11	11.5755	120.171	207.832	TBI day 7-3
			TBI day 7-4	229.245	39.4197	30.8818	3.57717	36.3394	71.5585	102.463	248.009	28010.3	417.017	1980.87	455.765	958.928	0	1.36068	58.3765	27.9302	1.39865	520.035	0	9.83552	1687.64	0	1042.93	144.024	0	3076.73	2363.85	1548.11	19.3951	0	189.304	11.3077	911.71	0	174.429	2500.55	7.94817	183.509	111.201	TBI day 7-4
			TBI day 7-5	198.315	27.7108	25.184	4.17259	82.079	82.0993	342.583	3557.81	33456.8	330.253	1959.47	501.444	972.215	4685.14	39.934	1906.74	54.9043	144.159	482.343	313.422	20.7459	1606.9	0	1276.71	234.488	331.427	2999.18	2540.3	1807.21	75.0963	291.45	128.707	7.70105	853.202	0	150.62	5645.04	23.2906	204.918	433.599	TBI day 7-5
			TBI day 7-6	182.702	27.4635	26.239	4.05121	58.0079	83.885	90.4117	1932.63	36149.3	267.442	1951.45	581.268	1092.63	2486.17	12.0183	990.659	0	19.8332	432.357	0	12.2377	1081.72	0	908.313	115.083	0	2311.43	2197.66	1290.48	47.5268	0	73.5838	10.346	888.375	134.959	166.388	2927.24	14.4937	286.424	379.32	TBI day 7-6
			TBI day 7-7	148.199	29.4592	29.6056	4.47233	52.1602	86.4394	144.873	1337	28199.3	334.554	1880.94	499.4	1008.23	2810.44	20.3585	1353.92	46.1798	79.2294	311.607	161.618	14.3829	771.847	0	1037.57	189.096	0	2304	1763.04	1179.81	47.8316	0	75.8009	6.7802	912.831	0	152.247	1690.37	14.9442	232.153	383.581	TBI day 7-7
			TBI day 7-8	91.7327	30.5447	29.6297	3.5756	42.9693	57.1745	0	242.975	27641.1	191.991	2002.71	379.792	594.512	2974.48	3.27779	148.562	40.4641	14.6837	1304.89	75.7747	6.42778	532.044	0	380.627	208.759	0	1992.28	1880.22	1243.79	14.1655	2153.99	148.772	9.98539	490.213	100.008	153.497	384.913	7.65037	158.261	122.995	TBI day 7-8
			TBI day 7-9	157.095	31.902	30.1018	4.05761	28.3543	71.3438	340.831	3548.91	29247.4	250.002	1886.76	559.859	875.86	6469.1	40.5409	1781.37	66.2373	112.569	331.616	275.598	18.0838	761.776	0	1111.14	139.11	291.263	2190.73	1816.46	1644.57	63.5768	156.84	114.165	4.05326	869.6	85.3898	94.7913	4571.43	14.1353	371.525	432.696	TBI day 7-9
			TBI day 7-10	116.975	22.2127	21.8831	3.10182	63.0991	68.002	92.7542	3554.33	30337.3	194.686	1771.9	483.064	930.173	0	26.2584	1922.58	17.3587	22.8539	619.33	206.083	13.3505	578.65	0	830.511	211.504	0	2389.47	2237.46	1331.56	44.862	228.782	75.0299	6.46847	658.393	0	120.1	3387.49	12.2201	260.129	384.444	TBI day 7-10
			TBI day 7-11	121.062	25.1955	25.7622	3.80557	26.4602	74.5126	126.745	2577.81	32480	191.163	1928.76	525.425	746.054	6110.32	41.9199	1538.93	52.1137	43.4117	478.516	77.4606	16.1683	918.876	0	1149.02	227.868	11.1211	3028.02	2230.25	1442.2	48.5205	472.081	115.856	9.13837	848.775	0	54.9213	5860.22	29.2931	188.357	466.604	TBI day 7-11
			TBI day 7-12	166.01	30.2978	19.5775	2.78234	56.6583	43.8871	55.1529	2916	31753.7	123.666	1973.88	431.84	490.583	0	31.5473	1364.98	35.2736	43.1239	324.065	125.746	14.5843	695.244	0	715.302	189.42	0	2881	2276.88	1228.3	31.8217	155.322	91.4215	5.31027	760.95	0	0	6509.67	21.1996	306.221	376.995	TBI day 7-12
			TBI day 14-1	124.667	28.791	21.7752	3.14923	55.917	80.0607	0	2726.5	33729.6	387.37	2205.34	522.866	583.844	0	4.77974	777.963	9.07254	163.523	391.82	0	19.4722	780.883	0	1492.73	162.889	459.661	4634.13	3518.71	1483.98	68.7087	426.828	226.002	5.07894	761.181	0	100.198	9883.82	16.0331	345.652	214.596	TBI day 14-1
			TBI day 14-2	149.227	32.9702	25.8747	5.20218	38.012	105.325	0	599.042	34428.3	422.661	2078.33	419.872	680.789	0	2.17201	387.279	32.0602	0	1211.53	6.12753	14.4258	1026.85	0	780.79	222.169	471.914	3219.23	3059.97	1592.63	85.0043	0	262.733	10.1993	677.871	7796.72	102.138	2796.3	15.4877	175.122	88.4654	TBI day 14-2
			TBI day 14-3	56.1994	16.3214	20.9885	2.00894	25.9621	30.3711	0	339.195	26142.8	288.689	2029.9	414.339	696.991	0	0	0	9.66859	0	0	0	11.8312	328.332	0	985.941	121.207	0	2606.24	1577.23	1020.08	4.83016	0	124.979	5.46578	722.594	0	204.769	1416.14	16.7158	133.15	188.295	TBI day 14-3
			TBI day 14-4	65.5157	22.5066	27.4949	2.68006	36.5602	78.395	0	470.913	23853.1	349.71	2113.72	484.62	639.755	3072.77	9.01086	337.981	2.77093	0	1210.21	24.7826	6.08926	1878.72	0	886.454	128.723	579.156	2032.38	1392.39	962.604	7.63927	2496.49	147.599	12.7767	546.772	0	222.362	741.621	11.3575	152.012	82.4648	TBI day 14-4
			TBI day 14-5	322.801	58.854	44.5822	5.7154	84.0128	154.177	182.509	2557.22	37173.4	206.099	2464.75	520.649	895.313	9354.26	34.2566	1847.42	67.4458	94.4113	457.478	10.9762	16.774	461.637	0	1513.41	145.086	450.582	1162.95	2795.15	1077.76	76.8727	576.155	81.1297	15.3764	793.385	0	408.714	5631.32	19.6411	201.487	326.224	TBI day 14-5
			TBI day 14-6	467.007	72.774	42.8335	5.92377	81.8094	194.835	372.984	2916.87	38936.3	182.941	2395.75	577.892	1057.61	1387.27	44.3211	1953.08	26.1931	160.975	522.973	50.8802	24.2793	751.325	0	1532.16	183.738	630.658	4419.99	2434.72	2327.9	52.5711	266.175	157.181	0.639723	962.337	0	443.494	7310.31	29.4471	163.159	526.127	TBI day 14-6
			TBI day 14-7	495.744	64.037	48.4112	6.21928	57.9944	155.17	487.375	1936.29	32501.8	253.736	2388.5	780.208	1739.21	4830.88	60.5434	1541.96	47.2156	57.7263	620.335	226.632	18.848	1186.4	0	1303.97	206.627	274.888	3857.67	2492.81	2301.25	67.5469	430.529	107.34	6.55636	1309.58	9803.6	451.682	5691.42	27.9152	353.453	639.308	TBI day 14-7
			TBI day 14-8	442.334	66.9606	42.4006	6.23406	75.6609	70.0491	225.291	4348.37	34636.3	197.377	2446.62	590.991	1156.12	0	40.2652	2282.6	17.1117	127.414	278.262	286.011	24.7432	600.729	0	1826.92	185.33	615.901	4307.47	2207.8	2578.2	100.821	153.433	134.205	6.19827	896.26	7663.56	196.63	5291.13	27.0259	507.361	306.22	TBI day 14-8
			TBI day 14-9	476.165	80.044	39.3334	6.4728	61.3908	166.247	181.881	3731.51	37992.4	401.881	2207.73	584.13	1068.69	1206.82	29.4944	2735.22	22.5727	126.078	377.809	182.63	20.0252	627.792	0	1568.23	183.51	285.97	3047.07	2481.34	1729.15	60.2968	247.088	191.295	4.52268	862.726	2286.26	390.688	5534.24	19.8268	403.301	438.867	TBI day 14-9
			TBI day 14-10	415.418	59.5388	51.0288	6.44345	68.532	118.377	511.778	4039.74	40583	249.478	2306.41	608.428	1411.71	0	46.4681	2194.75	40.0558	132.407	415.527	66.5162	25.6535	637.762	0	1122.07	168.308	341.085	3176.45	2141.16	1773.48	76.0595	505.587	81.8795	5.74575	944.121	38.5688	690.985	5222.25	35.8635	305.141	508.842	TBI day 14-10
			TBI day 14-11	349.281	61.512	37.3843	5.94763	57.1361	166.048	323.984	3277.98	37802	236.753	2168.67	527.69	1227.44	1439.41	33.0894	1747.96	22.4941	124.748	1001.29	161.997	18.3417	727.706	0	1371.91	174.838	323.319	3179.72	2340.55	1742.14	51.6926	214.701	148.219	4.096	839.98	5371.56	326.023	4805.6	25.9696	429.515	483.023	TBI day 14-11
			TBI day 14-12	351.163	55.5556	37.2461	4.44021	72.8929	74.1307	430.175	4007.78	36179	182.049	2222.49	456.279	1004.67	0	38.004	2457.24	26.4249	129.446	243.149	110.195	22.7781	1040.01	0	1222.49	191.518	536.077	3755.85	1892.29	2018.98	46.38	403.235	118.049	12.256	768.039	10482.9	430.929	5698.98	16.9924	327.163	429.777	TBI day 14-12
			TBI day 30-1	168.203	34.9592	22.3275	3.04573	39.5816	79.2287	50.3422	733.458	24615.3	432.04	2014.39	469.379	867.251	0	36.8855	0	34.8941	60.5014	774.084	169.61	10.8732	386.13	0	813.491	152.733	548.03	2471.04	2222.75	1668.71	28.738	88.7191	166.637	13.6639	752.45	12155.3	195.034	2889.57	20.0052	92.994	285.74	TBI day 30-1
			TBI day 30-2	176.013	25.8906	23.9848	2.9634	36.2743	49.7537	12.7314	3076.81	23948.5	499.16	1996.18	553.497	895.117	0	23.7601	871.584	30.147	58.5257	654.889	149.976	11.8314	765.436	0	918.449	123.674	250.942	2619.69	2189.82	1231.03	15.5321	0	99.6654	5.04475	850.034	0	233.747	6268.26	14.8077	244.468	309.273	TBI day 30-2
			TBI day 30-3	166.818	33.7299	28.9667	5.03653	43.5511	39.1798	100.11	3469.56	27237.5	326.114	2066.61	524.872	741.335	1005.93	26.0502	963.019	14.0681	19.8834	810.671	24.9152	17	1079.35	0	1042.61	161.329	0	2248.29	3262.44	1144.12	29.4359	345.145	147.183	12.3894	986.059	2995.97	223.36	8680.99	19.6913	440.306	393.462	TBI day 30-3
			TBI day 30-4	182.647	35.2495	16.7275	3.84316	42.7668	53.1039	0	3113.2	25230.4	243.564	1983.9	549.969	549.808	0	38.9512	407.745	33.4431	68.295	361.711	0	11.9089	720.292	0	850.043	98.0365	195.674	2262.28	2140.66	1040.86	14.7008	247.585	87.2439	36.2786	886.939	0	195.764	6024.23	22.4815	356.747	276.092	TBI day 30-4
			CYT-8 antibody array
			LOD	24.226	19.7194	424.631	7.30127	61.8832	8.49761	3.417	27.3265	42.5136	13.516	3.25994	14.3354	24.2609	77.5734	20.8135	139.121	9.89118	6.5264	8.03108	9.17224	26.5846	116.119	12.9322	3.16038	19.0218	10.9381	1.7875	0.608847	3.63156	20.485	17.2382	108.054	43.6815	21.1046	260.37	38.2857	16.9793	29.1506	57.11	13.5664	LOD
			MAX	20000	4000	40000	10000	40000	100000	4000	100000	200000	10000	4000	10000	20000	200000	10000	100000	10000	20000	100000	2000	200000	100000	40000	4000	20000	10000	1000	4000	4000	20000	10000	100000	200000	200000	100000	40000	40000	20000	10000	10000	MAX
			Protein name	6Ckine	Activin A	ADAMTS1	Adiponectin	ANG-3	ANGPTL3	Artemin	CCL28	CD36	Chordin	CRP	E-Cadherin	Epigen	Epiregulin	Fas	Galectin-7	gp130	Granzyme B	Gremlin	IFNg R1	IL-17B	IL-17B R	IL-22	MIP-1b	MMP-2	MMP-3	MMP-10	PDGF-AA	Persephin	sFRP-3	Shh-N	SLAM	TCK-1	TECK	TGFb1	TRANCE	TremL1	TWEAK	VEGF-B	VEGF R2	Protein name
			sham -1	0	1159.5	1448.08	132.175	405.419	65.9236	16.6032	23.817	244.509	7.06284	60.3054	11.8852	1.38286	178.203	0	1002.71	540.119	81.9092	336.247	103.638	7853.58	12.2417	443.243	0	348.637	0	42.0876	169.211	0	6869.42	3.8628	0	3472.29	350.412	18554.6	0	186.756	0	0	0	sham -1
			sham -2	0	32.4503	0	262.242	12.9342	67.321	23.8323	0	299.658	19.5475	12.4313	0.694245	0	0	319.909	1688.92	649.036	0	0	106.198	0	0	133.284	0	67.9855	281.568	17.944	41.3538	0	2873.41	0	0	2809.08	3.29795	0	0	106.108	0	0	0	sham -2
			sham -3	0	1959.13	5476.53	194.505	217.939	466.642	19.3843	0	130.866	8.91378	9.73867	4.31417	2.84841	0	2436.24	759.958	253.487	115.312	1378.08	9.14348	2126.06	107.341	0	0	125.995	0	19.3995	71.6028	0	1556.34	1.82516	355.604	1324.32	61.2877	0	5745.78	258.114	0	25.2963	0	sham -3
			sham -4	0	127.028	1806.52	184.569	93.5059	57.1565	9.05655	0	208.712	0.953857	8.16343	11.8607	0.601351	0	1874.87	2161.24	275.056	118.019	0	51.4655	4176.08	0	933.163	0	128.262	682.41	44.6711	53.3874	0	3488.43	1.75234	677.545	3708.19	173.66	19215.9	13830.2	307.223	6.89326	37.6095	0	sham -4
			sham -5	0	1390.08	1216.91	313.237	94.311	101.575	12.4163	0	239.314	13.1805	42.5465	0	5.25314	0	1049.42	653.332	172.068	51.5662	0	31.8232	516.798	0	12.1202	0	80.6984	0	0.471893	33.9734	0	3453.7	0	22.5249	2295.33	0	0	0	35.9546	0	0	0	sham -5
			sham -6	0	501.392	6265.02	284.984	190.521	371.394	12.4601	0	237.15	20.9968	10.192	5.77167	3.47209	129.036	2730.4	1515.89	346.985	93.7577	500.543	20.2155	5470.04	0	0	0	128.799	0	16.1885	48.4023	0	2184.18	0	0	1570.18	61.1998	2717.71	21.3968	33.1376	0	0	0	sham -6
			sham -7	27.5159	667.787	1966.53	245.975	122.831	111.775	8.14799	0	237.741	13.7534	78.2399	19.0213	3.66384	0	1378.97	933.878	569.378	0	0	101.466	0	0	307.526	0	66.7417	0	20.3611	81.8224	0	4946.79	0.594463	0	4265.77	262.29	21962	0	235.864	0	7.08518	0	sham -7
			sham -8	0	477.112	0	192.121	124.514	83.9242	10.7061	0	515.593	14.1321	77.7962	60.1568	16.1323	0	0	832.507	660.673	49.9696	0	62.2068	0	0	0	0	112.705	0	31.6823	89.9013	0	5062.67	0.115542	0	4364.95	159.255	0	1004.61	132.989	0	39.1043	0	sham -8
			sham -9	0	0	0	250.467	126.974	0	23.5781	0	466.988	19.2516	18.0788	68.8251	15.0738	0	1429.62	716.129	706.835	0	0	133.214	0	0	175.871	0	55.2815	517.856	33.3467	110.235	0	5449.63	0	62.716	5779.63	253.217	63824.3	6541.17	377.817	0	20.0278	0	sham -9
			sham -10	0	86.3372	792.349	233.694	159.346	129.928	11.7261	0	469.943	5.4932	16.4218	64.3971	23.4183	0	1660.42	619.835	712.863	0	0	87.911	0	0	0	0	94.4593	0	29.6506	79.8214	0	6214.26	0	274.344	4707.02	252.058	0	462.9	205.763	0	65.0822	0	sham -10
			sham -11	0	326.182	3204.89	165.942	261.178	0	30.581	0	147.627	20.3073	54.6481	77.5444	31.0339	0	0	1217.69	781.607	0	0	69.0892	1468.06	0	14.6007	0	145.822	520.806	43.2927	92.9749	0	781.523	1.69728	546.423	4437.14	184.21	16502.8	1085.57	460.565	0	83.3371	0	sham -11
			sham -12	0	0	1332.28	173.861	324.305	292.566	25.9995	0	490.181	19.2301	32.024	111.093	37.8393	0	270.485	1130.42	976.201	83.9207	0	111.757	0	69.905	0	0	64.1042	605.791	42.6935	67.4856	0	946.926	0	227.43	3659.99	95.004	30179.8	13740.7	218.139	0	33.0025	0	sham -12
			sham -13	0	0	5213.1	158.417	171.6	261.001	22.1326	0	207.46	10.859	26.8138	77.5213	15.3384	0	0	469.06	600.789	0	0	74.0767	0	0	329.28	0	78.5788	579.379	32.3001	70.0593	0	1115.28	0.865183	532.043	3129.54	109.487	20945.8	67.3473	183.074	0	75.729	0	sham -13
			sham -14	0	742.96	1599.31	217.459	144.996	120.648	17.1909	0	393.483	15.9156	51.9205	111.655	37.1393	21.9375	0	716.166	761.051	62.2903	0	61.8805	724.798	0	0.938855	0	57.0541	369.283	33.0077	76.9168	0	1357.01	0	430.995	3033.17	62.2498	12975.8	6869.4	244.352	0	52.2687	0	sham -14
			sham -15	0	556.612	49.2077	176.368	161.596	135.584	18.7213	0	170.209	14.4941	45.3677	85.9062	26.9182	0	0	545.006	451.852	40.1541	0	43.7393	0	0	0	0	82.9431	0	32.946	74.2347	0	1051.04	0	421.111	2474.06	35.4921	0	0	346.692	0	103.068	0	sham -15
			sham -16	0	640.633	4869.94	147.484	168.994	268.23	14.6428	0	159.605	8.03703	19.4602	69.2449	17.3235	0	0	984.112	316.862	0	0	37.7063	240.162	0	0	0	56.3304	0	24.998	55.4249	0	1441.61	0	421.423	1651.13	82.004	0	0	219.006	0	78.9644	0	sham -16
			sham -17	0	540.916	3182.17	173.495	137.409	3.60215	11.091	0	202.02	3.32566	46.3191	181.199	42.9914	58.4514	1203.77	581.798	821.585	116.469	0	108.62	5133.74	57.808	0	0	101.542	395.186	29.9766	135.378	0	1800.76	2.48919	214.741	5399.61	99.0462	4219.06	10513.7	365.693	0	29.2077	0	sham -17
			sham -18	0	0	7168.29	174.542	178.601	18.3559	13.2978	0	437.316	8.61667	40.9162	98.5397	20.7388	0	2866.55	898.128	963.17	85.1777	0	102.159	1194.14	0	687.08	0	87.9216	1426.57	54.7371	108.125	0	1666.19	0.272907	720.782	3963	130.905	0	573.97	364.834	0	76.4555	0	sham -18
			TBI 8 hr -1	0	0	0	169.672	9.09581	0	17.3077	0	86.9375	4.92446	77.9203	12.9845	1.44294	0	0	310.238	562.924	0	0	100.134	0	0	54.7323	0	34.4093	0	30.7942	104.865	0	6716.34	0	0	2475.54	89.0707	0	0	106.91	0	0	0	TBI 8 hr -1
			TBI 8 hr -2	0	0	0	178.727	91.8777	0	3.17351	0	237.036	6.35487	89.9569	22.3303	0	0	1408.3	635.842	709.856	0	0	55.9487	0	0	0	0	99.2994	0	32.9423	119.002	0	7003.23	0	0	3692.43	146.85	0	2888.6	63.5432	0	4.5654	0	TBI 8 hr -2
			TBI 8 hr -3	0	443.325	2420.27	187.447	46.1709	0	13.9508	0	291.532	16.0004	30.348	33.1056	0	0	0	296.248	463.334	4.03335	0	114.766	1756.46	0	372.588	0	101.622	65.3147	29.5009	92.683	0	8818.32	0.0108795	488.466	3685.16	95.868	19045.4	11330.6	84.4529	15.1932	9.05227	0	TBI 8 hr -3
			TBI 8 hr -4	0	218.877	1834.36	181.225	87.1355	0	6.62608	0	265.143	5.65785	81.1803	26.1714	0	0	426.859	531.779	486.452	0	0	84.2526	0	0	0	0	146.836	0	25.8976	93.395	0	8705.11	0	427.953	2793.9	48.3577	278.832	917.769	70.3603	8.0207	2.18692	0	TBI 8 hr -4
			TBI 8 hr -5	0	0	6024.13	185.528	246.111	60.201	22.1824	0	641.507	13.9045	55.3362	152.26	43.5172	0	1268.3	792.587	1125.45	84.6994	1824.87	126.65	483.371	0	280.127	0	161.401	505.069	34.769	105.015	9.53971	2657.82	2.58905	1412.45	4881.37	89.1445	24164.8	10262.8	495.298	0	153.523	0	TBI 8 hr -5
			TBI 8 hr -6	0	526.406	3736.07	174.196	272.561	148.683	23.6109	0	305.575	18.2344	79.6033	123.841	52.1341	0	3184.01	961.445	1013.89	96.2537	0	163.649	2685.77	0	461.316	6.06495	127.19	1998.16	43.044	108.527	0	2658.3	2.7269	1388.67	5717.53	174.786	66033.7	18832.4	596.681	78.971	186.59	0	TBI 8 hr -6
			TBI 8 hr -7	0	877.281	8443.21	142.104	353.822	289.22	25.8716	0	312.648	19.7116	46.0046	107.247	45.4924	0	2260.48	1062.7	941.583	191.225	746.865	148.752	12220.3	143.752	785.331	0	181.417	2170.29	36.1102	109.372	30.3885	2532.57	4.7951	2059.46	4610.28	164.997	10813.6	0	478.907	0	89.3717	0	TBI 8 hr -7
			TBI 8 hr -8	0	1114.79	2945.63	164.428	127.44	118.017	25.864	0	333.792	14.4057	58.8219	109.804	32.977	0	0	1198.56	971.838	0	0	141.51	2199.17	0	146.183	0	130.631	1130.75	34.2046	89.7292	0	2240.9	0.803525	1291.44	4092.69	125.052	32321.2	1221.48	317.434	53.3779	244.09	0	TBI 8 hr -8
			TBI 8 hr -9	0	487.996	2861.52	187.896	88.8525	105.575	14.7578	0	213.398	3.08155	113.196	136.832	54.8018	0	0	619.275	900.078	40.2677	0	90.3877	1715.57	0	656.963	0	153.098	1087.29	42.5042	96.3016	0	957.21	1.07704	1562.35	2842.31	7.14931	24918.1	13891.3	132.47	110.798	343.718	0	TBI 8 hr -9
			TBI 8 hr -10	0	926.785	4886.05	305.195	248.525	499.081	28.8484	0	422.471	32.8117	134.133	103.517	48.2438	0	0	1586.07	1006.96	90.0345	427.564	140.473	7867.86	68.1313	335.945	0	232.893	795.815	50.6623	94.9766	0	984.535	2.35679	767.254	4730.24	224.253	17880.3	20741.9	457.46	112.914	366.13	0	TBI 8 hr -10
			TBI 8 hr -11	0	127.667	0	209.529	135.808	0	20.7123	0	425.502	25.8356	49.4677	103.127	31.4169	0	0	891.992	838.991	5.94738	0	118.77	0	0	0	0	117.835	223.704	21.5081	84.0807	0	706.816	0	0	3333.19	8.60399	0	0	234.614	0	110.919	0	TBI 8 hr -11
			TBI 8 hr -12	0	0	0	231.675	58.0119	0	5.77923	0	152.073	0	68.4507	125.08	14.1074	0	0	301.698	730.856	0	0	85.2219	0	0	0	0	90.8934	0	13.1868	95.3519	0	370.595	0	0	2482.66	0	0	0	162.331	0	61.0985	0	TBI 8 hr -12
			TBI 24 hr -1	0	578.667	5.51422	144.396	70.6133	28.9012	10.8415	0	4.29896	9.19304	6.33542	4.11941	5.08294	0	0	3015.07	311.743	51.6121	0	63.1121	2133.64	0	0	0	67.6849	0	5.03374	58.3301	0	7975.78	0	465.104	2351.55	50.6051	0	10896.7	235.54	0	19.8007	0	TBI 24 hr -1
			TBI 24 hr -2	0	1444.76	3107.88	170.271	134.89	0	0.737482	0	49.6812	8.7896	69.7645	0	3.86359	0	0	429.081	351.176	8.88912	885.643	57.9126	0	0	0	0	34.5838	0	11.5552	93.4086	0	5754.76	0	140.322	2501.14	0	0	5864.63	180.614	0	8.18126	0	TBI 24 hr -2
			TBI 24 hr -3	22.5956	665.508	256.09	169.765	111.648	1.81638	5.77056	0	123.334	2.80004	12.9912	5.15775	2.10074	0	1723.25	517.277	298.77	0	0	33.8431	0	0	0	0	22.8428	0	0	60.5268	0	4829.87	0	0	2129.15	88.625	0	1532.44	165.766	0	6.63602	0	TBI 24 hr -3
			TBI 24 hr -4	0	0	0	185.99	181.121	5.27487	2.46918	0	109.673	5.69387	14.6752	3.39164	1.89585	0	0	347.577	379.792	0	0	65.0553	2281.11	0	0	0	55.6234	0	6.86611	67.2345	0	7719.89	0	0	2882.5	56.2149	0	988.798	99.2755	0	1.79949	0	TBI 24 hr -4
			TBI 24 hr -5	0	0	592.674	176.491	105.848	0	8.71264	0	242.442	0	32.4517	107.879	21.8939	0	0	455.465	583.132	38.5037	0	60.7382	0	0	0	0	32.0327	159.184	4.46131	90.5208	0	791.1	0	95.568	2084.97	40.7478	0	0	160.682	0	98.4488	0	TBI 24 hr -5
			TBI 24 hr -6	0	0	645.575	159.484	60.1067	0	7.68301	0	91.6424	0	29.1052	97.587	22.3907	0	0	296.807	643.384	0	0	60.6377	0	0	0	0	105.788	0	13.9003	72.5363	0	637.846	0	0	2246.72	17.9234	0	0	77.3921	0	117.089	0	TBI 24 hr -6
			TBI 24 hr -7	0	0	2866.76	166.619	87.837	0	11.7689	0	300.5	4.80893	45.369	119.201	14.3444	0	0	424.825	583.118	44.3577	0	78.9885	0	0	30.0391	0	165.058	0	9.97079	97.9183	0	648.906	0	65.5918	2656.91	1.11112	0	0	191.823	0	45.7217	0	TBI 24 hr -7
			TBI 24 hr -8	0	0	964.902	141.963	54.5212	0	4.20444	0	70.5538	0	29.9946	103.606	6.00361	0	0	301.634	524.296	30.077	0	52.8231	0	0	251.533	0	111.848	0	7.51317	72.8331	0	908.493	0	0	2489.31	0	0	0	96.5953	0	107.458	0	TBI 24 hr -8
			TBI 24 hr -9	0	0	0	148.438	162.904	0	10.6569	0	142.063	1.62198	54.1583	103.968	18.9962	0	0	639.471	545.71	80.8575	0	69.5032	1178.9	0	103.723	0	101.792	1037.82	29.1802	87.6818	0	1339.19	0.573159	766.124	3347.29	125.443	0	0	280.143	0	135.679	0	TBI 24 hr -9
			TBI 24 hr -10	0	0	581.076	166.692	57.1703	8.82457	2.43599	0	325.902	3.90804	91.181	165.698	47.287	0	1117.73	489.439	440.986	0	0	50.4736	0	0	0	0	93.1963	0	26.2149	84.2763	0	1247.49	0.307976	0	4182.27	12.7142	0	0	227.297	0	166.126	0	TBI 24 hr -10
			TBI 24 hr -11	0	0	695.971	184.784	136.33	0	0.0970094	0	181.08	1.08876	130.287	161.897	33.3196	0	1216.71	185.376	667.664	0	0	74.2972	0	0	13.1831	0	2.50424	0	14.292	89.7617	0	498.168	0	248.794	2606.28	90.7805	0	0	247.322	0	97.2039	0	TBI 24 hr -11
			TBI 24 hr -12	0	0	0	199.8	26.4915	0	0.611515	0	355.928	0	47.0012	179.075	31.948	0	0	314.507	649.929	0	0	47.6413	0	0	0	0	74.5576	0	12.716	104.595	0	677.556	0	304.012	2209.72	0	0	0	162.359	0	62.2761	0	TBI 24 hr -12
			TBI 48 hr -1	0	0	3931.32	260.146	145.824	0	10.9647	0	483.483	3.73871	47.4511	173.043	30.0516	0	345.194	565.047	775.788	0	0	92.8399	0	0	138.659	0	38.4485	32.3723	5.43428	91.5066	0	651.209	0.100793	668.224	2164.62	89.5688	0	0	171.032	0	135.978	0	TBI 48 hr -1
			TBI 48 hr -2	0	0	0	294.223	78.1395	0	1.06394	0	667.977	4.21912	145.711	156.916	29.738	0	620.411	487.933	479.267	0	0	67.6531	0	0	0	0	61.0663	0	2.32766	49.8081	0	573.436	0	30.6203	2619.79	20.3066	0	0	141.136	0	54.7749	0	TBI 48 hr -2
			TBI 48 hr -3	0	263.082	1177.95	214.966	85.0525	0	2.29789	0	923.805	0	122.075	73.1535	23.2996	0	0	589.984	505.303	8.69768	0	5.43311	623.588	0	120.973	0	63.7546	0	16.945	76.3634	0	917.19	0	669.267	1845.22	17.1709	0	291.638	25.927	62.6056	252.225	0	TBI 48 hr -3
			TBI 48 hr -4	0	0	0	190.991	68.8123	0	3.54475	0	323.522	1.59434	39.1096	136.733	21.3077	0	0	624.042	477.084	0	0	64.45	0	0	137.885	0	54.4131	0	0	36.3058	0	259.838	0	738.982	1689.82	0	0	0	0	0	58.6869	0	TBI 48 hr -4
			TBI 48 hr -5	0	88.7191	941.781	178.144	163.622	27.9468	8.22367	0	220.451	22.3631	43.058	182.352	53.1158	0	0	1047.81	799.44	18.357	0	84.4777	2400.13	0	0	0	131.721	0	17.7823	91.5667	0	729.369	0.564431	672.432	3348.04	77.6827	0	0	223.325	0	61.2684	0	TBI 48 hr -5
			TBI 48 hr -6	0	0	0	275.546	107.943	0	11.2816	0	442.255	2.75478	42.1327	170.021	32.9752	0	69.3061	1110.11	739.458	2.11916	0	54.2619	0	0	26.6481	0	42.0036	11.8216	20.7311	104.91	0	686.338	0.404324	122.525	3932.04	29.3493	0	0	272.794	0	103.342	0	TBI 48 hr -6
			TBI 48 hr -7	0	0	630.413	197.887	138.494	0	14.9968	0	229.314	9.65412	54.1196	149.036	31.8554	0	0	701.304	949.292	36.6935	0	122.802	0	0	0	0	41.9569	1224.69	43.6902	93.075	0	1036.26	0.056874	507.334	3569.53	33.0096	15773.3	0	394.74	0	115.256	0	TBI 48 hr -7
			TBI 48 hr -8	0	0	0	365.398	76.6023	0	6.59217	0	425.675	0	186.368	205.919	32.5169	0	0	530.459	719.223	141.682	0	72.2743	2173.57	0	2.92419	0	176.264	0	8.56686	114.11	0	914.126	0	157.251	4485.45	61.5982	0	0	208.148	0	187.256	0	TBI 48 hr -8
			TBI 72 hr -1	0	564.212	2640.27	185.216	118.904	0	14.753	0	434.444	25.0363	19.6983	27.8754	1.86107	0	2091.97	522.288	623.66	0	0	97.3184	0	0	0	0	240.978	0	15.2977	117.671	0	7174.09	2.18074	0	3258.31	260.154	1269.66	293.292	213.533	0	35.9398	0	TBI 72 hr -1
			TBI 72 hr -2	0	0	1148.1	269.879	153.239	0	12.0102	0	406.903	15.9163	20.4343	19.8803	0	0	1775.98	885.679	726.051	0	0	37.0698	2260.05	0	0	0	183.968	0	6.92925	97.0907	0	5856.15	1.60504	0	3154.88	229.568	4232.52	817.522	173.002	0	82.9218	0	TBI 72 hr -2
			TBI 72 hr -3	0	0	430.86	205.125	117.654	99.4439	22.3134	0	432.324	21.3572	33.4953	14.5338	0	0	724.025	771.362	746.653	0	0	135.067	0	0	373.049	0	74.1817	0	39.8355	89.2708	0	6831.91	0	123.175	5363.23	199.648	14770.2	0	325.045	0	41.3544	0	TBI 72 hr -3
			TBI 72 hr -4	0	0	69.0298	192.459	140.066	30.288	10.006	0	391.102	22.2752	102.139	32.2055	3.79033	0	0	935.277	762.902	0	0	112.608	0	0	19.1208	0	0	0	30.9079	55.0437	0	3324.16	0	0	4412.07	163.261	6242.89	1603.46	97.003	0	0	0	TBI 72 hr -4
			TBI 72 hr -5	0	0	1701.93	204.019	126.344	0	8.09192	0	209.823	0.839024	79.3939	109.579	22.6083	0	0	682.841	596.992	0	0	56.6884	0	0	1.03024	0	64.1026	0	35.2531	122.121	0	1316	0	0	2274.38	104.49	9183.01	0	257.819	0	189.916	0	TBI 72 hr -5
			TBI 72 hr -6	0	0	0	181.364	101.004	0	14.3463	0	313.645	0	97.8945	126.864	19.3927	0	1221.25	607.976	865.106	7.35953	0	115.466	0	0	86.4328	0	117.398	498.449	40.4216	119.778	0	1092.79	0	394.386	3989.37	0	0	0	135.376	0	87.8433	0	TBI 72 hr -6
			TBI 72 hr -7	0	0	607.594	217.493	125.109	0	14.1486	0	418.428	0	108.28	195.762	46.0721	0	0	359.131	854.004	99.0824	0	96.6263	0	0	0	0	115.082	9.08076	39.3192	98.5646	0	1019.03	0	114.804	3251.3	89.5737	0	0	293.601	0	147.112	0	TBI 72 hr -7
			TBI 72 hr -8	0	936.021	0	238.273	68.61	0	7.32369	0	480.983	1.00035	108.227	156.71	12.1304	0	0	276.659	581.482	7.97449	0	101.369	1048.67	0	275.116	0	99.9529	474.272	12.4393	76.8583	0	1268.99	0	0	3458.66	0	1375.97	0	186.207	0	174.77	0	TBI 72 hr -8
			TBI 72 hr -9	0	0	154.892	222.509	85.023	0	25.0173	0	288.102	12.1739	39.5181	140.974	27.2725	0	1958.52	553.317	695.469	0	0	101.764	1574.48	0	0	0	138.682	1145.52	29.9605	92.1847	0	1032.26	0.753566	105.997	4719.45	70.3978	185.941	376.195	320.876	0	143.858	0	TBI 72 hr -9
			TBI 72 hr -10	0	0	0	234.968	128.307	0	11.1702	0	162.207	0	35.4542	141.163	28.8273	0	63.1523	773.801	686.476	13.5146	0	85.2671	3.39982	0	0	0	45.3445	587.219	34.5893	84.6687	0	706.17	0	32.319	4238.08	110.081	3423.13	0	183.313	0	102.223	0	TBI 72 hr -10
			TBI 72 hr -11	0	292.047	0	279.404	170.566	21.7248	18.4963	0	309.834	17.4006	98.151	212.382	40.7981	0	1876.91	645.559	820.644	18.6855	0	111.702	4543.03	0	0	0	102.223	568.684	48.9759	98.445	0	1559.95	2.54824	64.4916	5483.98	91.7196	0	0	493.393	0	278.016	0	TBI 72 hr -11
			TBI 72 hr -12	0	0	0	286.497	49.8103	0	16.1769	0	212.158	0	55.999	193.149	36.5541	0	0	947.807	853.185	0	0	72.3222	0	0	0	0	74.7083	0	16.9512	89.223	0	941.903	0	321.607	4006.08	0	0	0	185.294	0	107.17	0	TBI 72 hr -12
			TBI 96 hr -1	0	0	6842.27	345.236	119.544	139.152	25.3328	0	591.719	32.0632	68.6102	199.335	82.3537	0	1041.2	1228.06	677.843	80.0014	0	56.1345	1087.72	0	0	0	60.9369	0	0.826335	113.77	0	1417.2	1.0671	270.89	3154.59	55.5679	0	612.191	149.146	53.76	353.822	0	TBI 96 hr -1
			TBI 96 hr -2	0	92.5462	1468.09	235.355	108.184	139.731	10.5034	0	169.764	23.655	96.5976	83.9933	27.5896	0	0	551.461	764.676	0	0	98.1662	320.864	0	150.076	0	3.52994	719.505	34.5437	53.5528	0	614.371	1.31359	428.417	4497.21	146.878	28366.6	0	258.535	0	282.085	0	TBI 96 hr -2
			TBI 96 hr -3	0	0	0	244.696	114.518	0	26.392	0	762.109	21.8436	60.9475	107.132	55.7474	0	757.374	964.344	793.203	38.5908	0	53.5412	0	0	0	0	114.806	453.019	24.9215	120.936	23.5935	851.65	0.699305	669.884	3781.57	87.3051	0	1744.31	340.981	0	138.105	0	TBI 96 hr -3
			TBI 96 hr -4	0	779.827	6074.03	271.261	109.787	282.848	18.4556	0	494.542	22.6357	75.7462	167.949	71.1131	0	2212.47	1304.36	770.769	66.5342	0	80.8425	0	5.41758	0	0	173.991	44.1916	23.2478	103.729	0	691.665	3.73558	885.414	4313.1	222.249	2590.24	1687.4	407.468	0	141.89	0	TBI 96 hr -4
			TBI 96 hr -5	0	0	7760.55	187.078	104.962	85.9338	35.2164	0	129.249	17.5269	36.8086	76.5503	14.3134	0	2112.43	571.834	615.273	0.328093	0	34.8545	0	0	0	0	86.0134	50.2958	28.4498	75.1753	0	823.252	0.220988	532.533	2258.61	130.021	4675.03	0	293.083	0	127.998	0	TBI 96 hr -5
			TBI 96 hr -6	0	0	485.519	181.464	146.196	0	2.73042	0	180.365	0	112.891	148.9	20.8175	0	1314.95	979.551	468.233	0	0	39.0608	0	0	63.8157	0	31.4172	0	22.0845	66.1184	0	822.683	0.477696	44.6084	2787.39	45.2729	0	0	167.713	0	240.945	0	TBI 96 hr -6
			TBI 96 hr -7	0	560.995	3443.83	200.195	146.055	141.241	23.5523	0	368.807	8.58857	44.0389	109.092	15.3205	0	248.826	789.19	660.821	17.0167	0	107.534	364.474	0	168.078	0	126.857	2022.54	20.3407	106.334	0	838.62	1.62625	1334.97	4317.22	174.892	9867.91	0	378.438	0	137.706	0	TBI 96 hr -7
			TBI 96 hr -8	0	0	2725.19	180.642	170.994	141.841	20.3837	0	445.681	2.05149	80.9513	89.1816	8.24814	0	0	913.41	786.863	0	0	100.447	76.925	0	153.085	0	12.7119	1957.45	51.7949	80.0871	0	958.125	0	2844.54	5083.94	136.024	71238.3	9059.62	281.117	46.5443	245.41	0	TBI 96 hr -8
			TBI day 7-1	0	0	0	201.425	82.078	0	11.8194	0	68.6865	4.50049	9.6177	0	0	0	0	153.466	535.698	0	0	99.8392	0	0	145.075	0	99.4251	0	12.5999	80.3957	0	6050.97	0	0	3526.73	149.605	0	0	158.906	0	0	0	TBI day 7-1
			TBI day 7-2	0	0	759.342	301.328	75.8455	0	4.77462	0	350.696	12.9285	14.5967	3.26581	0	0	0	153.375	547.2	0	0	55.0452	28.8585	0	0	0	37.6187	0	10.8822	75.6397	0	5898.83	0	0	5251.2	142.374	0	6217.91	53.3756	0	16.8261	0	TBI day 7-2
			TBI day 7-3	0	0	776.87	234.045	168.326	0	9.46602	0	219.923	1.14725	12.5307	0	0	0	43.3724	261.838	345.941	7.99953	0	47.4671	0	0	102.491	0	86.5012	0	9.05252	82.7514	0	6040.39	0	297.82	2899.55	142.867	0	0	144.972	0	0	0	TBI day 7-3
			TBI day 7-4	0	0	0	240.214	55.3494	17.1653	10.5317	0	300.059	2.04726	14.6119	0	0	0	0	231.546	464.931	0	0	42.6165	146.569	0	114.489	0	62.2369	0	14.8588	102.979	0	7488.29	0	0	3461.86	92.1191	0	636.73	214.236	0	32.3753	0	TBI day 7-4
			TBI day 7-5	0	0	9223.07	235.085	143.622	8.2894	17.818	0	565.224	3.48249	55.8092	223.381	60.1038	0	2367.6	543.075	963.37	68.0975	1122.9	123.22	4976.3	0	485.104	0	151.607	1414.02	33.3049	128.779	0	1066.35	1.4438	784.989	4632.14	261.643	19199.5	1637.87	442.198	0.0335282	211.574	0	TBI day 7-5
			TBI day 7-6	0	1588.48	11336.6	176.882	155.182	266.073	12.4427	15.5147	369.12	3.62245	48.9053	146.963	24.9326	516.898	0	867.497	568.803	55.7514	0	64.9974	0	0	0	0	136.591	324.172	29.5582	99.5034	0	498.743	1.63701	34.2192	1756.81	125.449	0	0	286.368	0	70.3864	0	TBI day 7-6
			TBI day 7-7	0	1176.85	8830.62	282.216	136.885	487.143	29.1622	0	678.366	29.8643	179.538	169.041	73.783	626.706	4925.29	4310.82	661.503	277.927	11262.6	123.691	9083.49	3302.53	1135.22	0	214.792	1664.87	79.6297	164.394	10.8322	1539.1	8.91167	1798.14	5117.95	386.546	0	32441.5	711.366	0	384.842	0	TBI day 7-7
			TBI day 7-8	0	149.794	5311.61	248.092	40.7144	25.9591	18.4728	0	675.546	27.3856	123.867	21.156	18.3385	60.2302	2630.48	1691.86	479.793	204.472	1143.62	62.6054	0	53.2582	100.922	0	165.113	0	5.19126	84.4537	0	946.924	0	0	1735.18	0	0	0	63.025	0	4.61353	0	TBI day 7-8
			TBI day 7-9	0	470.892	12873.9	209.316	114.151	1116.04	39.93	0	689.755	15.1476	53.9077	211.16	83.7154	261.829	0	1969.59	821.586	0	0	112.636	2595.8	0	974.927	0	141.608	3454.7	42.772	98.1232	3.03046	1117.71	1.00065	1558.74	4838.04	106.3	40773.6	15408.9	399.154	161.167	264.533	0	TBI day 7-9
			TBI day 7-10	0	0	952.589	221.46	177.565	170.477	22.9744	0	471.798	19.2174	53.2238	136.886	29.5894	0	744.004	1044.13	944.701	0	0	79.3214	1633.59	0	0	0	75.5831	1500.84	26.2989	104.501	0	785.822	2.37727	61.6135	4711.61	156.846	9550.33	0	270.855	0	196.102	0	TBI day 7-10
			TBI day 7-11	25.1918	1100.26	19965.5	251.509	222.401	626.315	41.9015	0	722.522	32.4695	163.698	146.567	67.3461	0	1046.46	771.651	867.52	101.677	0	132.524	6097.9	0	1042.94	0	110.295	1099.91	34.2064	134.862	0	953.705	1.17652	2020.79	4288.3	160.818	40288	12605.4	190.218	96.8613	395.038	0	TBI day 7-11
			TBI day 7-12	0	3015.29	0	255.661	638.304	1428.1	39.8796	78.5709	1000.94	62.5803	68.7122	240.784	171.15	0	4050.18	3180.37	967.296	159.215	14382.6	87.8348	11772.9	1194.08	310.028	0	332.547	472.847	31.3018	128.454	0	866.347	7.43519	1068.45	3727.51	875.955	8614.33	11779.8	672.444	0	336.856	12.6614	TBI day 7-12
			TBI day 14-1	0	0	0	219.641	123.268	0	18.8094	0	585.773	10.4134	95.4873	117.59	33.7312	0	2860.28	478.377	1142.36	19.0277	0	167.005	3810.69	0	375.016	0	228.455	1033.17	36.1928	147.062	0	9186.93	1.01175	881.208	4679.03	417.725	20685.3	4873.28	364.302	0	144.226	0	TBI day 14-1
			TBI day 14-2	0	658.009	1791.08	290.691	89.8652	72.3326	11.177	0	796.981	7.34541	186.216	2.78518	0	0	0	538.054	647.303	100.493	0	91.7781	1122.39	0	6.14303	0	38.0129	0	33.6009	113.162	0	7307.46	0	208.364	5177.78	161.49	0	0	188.634	0	10.4958	0	TBI day 14-2
			TBI day 14-3	0	561.751	1282.85	221.03	126.034	22.5367	4.0131	0	98.2856	0.815696	15.1375	0	0	0	2526.54	344.535	310.757	20.3153	1316.72	64.4136	0	0	16.0833	0	23.4232	0	2.84062	61.0802	0	3495.11	0	777.84	2097.77	0	976.617	0	138.2	0	26.2622	0	TBI day 14-3
			TBI day 14-4	0	1377.94	3130.88	183.115	154.25	21.5342	4.74716	0	136.31	2.26075	11.1551	2.41481	0	0	137.942	334.664	305.433	117.131	0	51.3132	1417.62	0	18.8789	0	0	0	0.506029	46.8812	0	5089.63	0	303.458	2353.73	0.494101	3700.01	17548.1	157.506	0	72.769	0	TBI day 14-4
			TBI day 14-5	0	411.196	3075.67	142.665	151.748	93.3838	14.6702	0	1315.71	3.83682	32.5349	77.6978	24.6522	0	0	714.48	639.467	0	0	39.2869	0	0	0	0	95.8633	530.641	15.853	108.095	0	683.863	2.72808	0	2973.36	81.9702	6121.87	5446.13	303.012	0	106.435	0	TBI day 14-5
			TBI day 14-6	0	0	0	228.115	125.092	0	14.8179	0	238.715	5.29888	36.4657	149.525	58.952	0	0	1137.71	897.984	0	0	80.1353	0	0	7.98887	0	101.838	203.416	21.6629	79.1293	0	726.596	0.673257	446.386	3123.44	92.3756	0	0	272.222	0	115.453	0	TBI day 14-6
			TBI day 14-7	0	0	2679.57	180.434	82.7272	0	12.1683	0	412.821	1.29306	36.0273	99.8266	38.6967	0	0	651.965	592.169	0	0	28.5852	0	0	0	0	41.0584	0	16.3559	79.5068	0	1069.57	0.936478	0	3435.41	139.875	0	0	357.455	0	163.094	0	TBI day 14-7
			TBI day 14-8	0	0	3598.87	204.807	218.992	262.091	17.6444	0	285.8	21.5265	36.615	119.377	27.137	0	0	678.955	674.618	0	0	72.0182	1394.38	0	132.834	0	76.4922	1079.62	46.1065	86.3	0	761.726	0	0	3750.27	268.593	22423.7	141.09	343.58	0	130.858	0	TBI day 14-8
			TBI day 14-9	0	93.4249	1887.24	171.345	154.859	0	21.3872	0	333.535	9.22401	33.9488	120.694	32.5679	0	0	646.24	667.878	0	0	66.533	205.965	0	325.405	0	41.1789	1656.02	44.6482	84.6711	0	1083.37	0.21666	311.76	4228.09	181.477	24270.2	1084.52	328.932	0	159.163	0	TBI day 14-9
			TBI day 14-10	0	0	2806.11	170.556	259.555	112.168	17.0241	0	223.093	9.41545	30.9595	154.971	45.6428	0	0	542.451	653.577	0	0	69.6222	1414.26	0	137.221	0	80.1424	694.12	31.9141	87.9475	0	677.466	1.06722	1485.05	3157.2	98.2266	17454.6	202.039	304.48	0	228.556	0	TBI day 14-10
			TBI day 14-11	0	662.133	0	194.239	232.139	64.6672	21.5428	0	559.653	5.74323	98.4732	103.275	35.3206	0	0	1000.13	695.938	55.3935	0	80.6636	7237.65	0	527.724	0	56.7722	1088.84	47.2482	99.6897	2.88775	1106.74	0.699603	828.306	3491.85	303.067	19641	10621.5	304.466	0	149.958	0	TBI day 14-11
			TBI day 14-12	0	0	951.828	216.648	81.9292	192.29	27.03	0	319.415	14.0338	49.1078	118.552	33.8677	0	2274.52	743.361	849.885	18.3553	0	77.3237	153.506	0	331.756	0	66.9043	2707.56	39.026	107.08	0	1104.74	1.0363	448.074	4774.87	165.631	20572.4	3459.03	323.629	84.5761	262.337	0	TBI day 14-12
			TBI day 30-1	0	1350.16	5077.46	222.329	187.336	113.892	13.7383	0	187.664	12.5821	20.7225	14.9194	2.78475	0	2786.89	560.778	470.892	67.6666	0	84.1813	0	0	92.8221	0	94.5967	348.097	11.6639	83.8463	0	6111.3	0.0186189	1005.95	2850.06	68.4037	12947.6	16554.9	196.504	0	37.701	0	TBI day 30-1
			TBI day 30-2	0	1025.21	2692.92	180.721	256.389	0	20.2322	0	86.355	12.9206	13.256	47.3605	25.0177	0	773.498	662.631	610.561	43.4521	16.6327	143.441	1177.22	0	490.675	0	104.755	0	17.7332	100.03	0	7963.89	1.06343	1183.6	4668.4	188.346	6984.24	25188.9	270.925	0	106.865	0	TBI day 30-2
			TBI day 30-3	0	542.746	0	315.435	98.5706	10.2729	24.5278	0	383.389	20.3271	16.1426	112.461	46.3718	0	1935.87	1199.34	743.093	47.4279	0	148.829	2798.94	0	787.143	0	192.521	803.022	60.3225	127.957	0	3003.14	2.32707	1111.08	5135.18	352.442	39681.8	24208.5	363.132	93.0015	111.845	0	TBI day 30-3
			TBI day 30-4	0	1417.35	5512.14	224.708	183.293	245.564	16.017	0	187.319	21.7018	12.0421	56.8962	21.4897	0	691.644	924.148	793.068	101.035	0	141.199	6045.52	0	584.387	0	99.2974	635.908	43.0358	95.207	0	5720.95	0.737361	326.318	3378.67	275.186	38851.3	10406.5	279.137	15.7256	124.132	0	TBI day 30-4
