# Supplementary material for: Time-dependent cytokine and chemokine changes in mouse cerebral cortex following a mild traumatic brain injury
Source: eLife. 2020 Aug 17;9:e55827. doi: 10.7554/eLife.55827 (PMC7473773; doi:10.7554/eLife.55827)
Supplement: Source data 2. — This file contains the raw data in relative fluorescent units for each of the proteins measured in the neuronal extracellular vesicles. Provided are target full name, target, uniprot, entrez gene id, entrez gene symbol. The sample identity is provided. These data relate to the protein measurements from the plasma derived neuronal extracellular vesicles that were screened on the SOMASCAN assay, Figure 6. [file elife-55827-data2.xlsx]

## Sheet: CHI-16-006.noduplicate111616
Source data related to plasma derived neuronal extracellular vesicle studies
		TargetFullName	E3 ubiquitin-protein ligase CHIP	CCAAT/enhancer-binding protein beta	Gamma-enolase	E3 SUMO-protein ligase PIAS4	Interleukin-10 receptor subunit alpha	Signal transducer and activator of transcription 3	Interferon regulatory factor 1	Transcription factor AP-1	Induced myeloid leukemia cell differentiation protein Mcl-1	2'-5'-oligoadenylate synthase 1	Myc proto-oncogene protein	Mothers against decapentaplegic homolog 3	Mothers against decapentaplegic homolog 2	Interleukin-23	Platelet-derived growth factor receptor alpha	Interleukin-12	Signal transducer and activator of transcription 1-alpha/beta	Signal transducer and activator of transcription 6	Leucine-rich repeat serine/threonine-protein kinase 2	Osteocalcin	Interleukin-5	Glycerol-3-phosphate dehydrogenase [NAD(+)], cytoplasmic	Immunoglobulin A	Galectin-10	HemK methyltransferase family member 2	Pyridoxal kinase	Toll-like receptor 4	Regenerating islet-derived protein 4	Heat shock protein beta-1	Chitinase-3-like protein 1	Alpha-enolase	Apolipoprotein L1	ADP-ribosyl cyclase/cyclic ADP-ribose hydrolase 1	CD59 glycoprotein	Fatty acid-binding protein, liver	Growth/differentiation factor 11	Betacellulin	Hypoxia-inducible factor 1-alpha	Protein S100-A6	Secreted and transmembrane protein 1	R-spondin-3	Lithostathine-1-alpha	Bcl-2-like protein 2	Vascular endothelial growth factor D	Sclerostin	Protein FAM3D	Chorionic somatomammotropin hormone
		Target	CHIP	CEBPB	NSE	PIAS4	IL-10 Ra	STAT3	IRF1	c-Jun	Mcl-1	OAS1	c-Myc	SMAD3	SMAD2	IL-23	PDGFRA	IL-12	STAT1	STAT6	LRRK2	Osteocalcin	IL-5	GPDA	IgA	LPPL	HEMK2	PDXK	TLR4	REG4	HSP 27	YKL-40	Alpha enolase	Apo L1	CD38	CD59	FABPL	GDF-11	BTC	HIF-1a	S100A6	SECTM1	RSPO3	PSP	Apoptosis regulator Bcl-W	VEGF-D	SOST	FAM3D	CSH
		UniProt	Q9UNE7	P17676	P09104	Q8N2W9	Q13651	P40763	P10914	P05412	Q07820	P00973	P01106	P84022	Q15796	P29460, Q9NPF7	P16234	P29459, P29460	P42224	P42226	Q5S007	P02818	P05113	P21695	P01876 P01877	Q05315	Q9Y5N5	O00764	O00206	Q9BYZ8	P04792	P36222	P06733	O14791	P28907	P13987	P07148	O95390	P35070	Q16665	P06703	Q8WVN6	Q9BXY4	P05451	Q92843	O43915	Q9BQB4	Q96BQ1	P0DML2 P0DML3
		EntrezGeneID	10273	1051	2026	51588	3587	6774	3659	3725	4170	4938	4609	4088	4087	3593 51561	5156	3592 3593	6772	6778		632	3567	2819	3493 3494	1178	29104	8566	7099	83998	3315	1116	2023	8542	952	966	2168	10220	685	3091	6277	6398	84870	5967	599	2277	50964	131177	1442 1443
		EntrezGeneSymbol	STUB1	CEBPB	ENO2	PIAS4	IL10RA	STAT3	IRF1	JUN	MCL1	OAS1	MYC	SMAD3	SMAD2	IL12B IL23A	PDGFRA	IL12A IL12B	STAT1	STAT6	LRRK2	BGLAP	IL5	GPD1	IGHA1 IGHA2	CLC	N6AMT1	PDXK	TLR4	REG4	HSPB1	CHI3L1	ENO1	APOL1	CD38	CD59	FABP1	GDF11	BTC	HIF1A	S100A6	SECTM1	RSPO3	REG1A	BCL2L2	FIGF	SOST	FAM3D	CSH1 CSH2
		Units	RFU	RFU	RFU	RFU	RFU	RFU	RFU	RFU	RFU	RFU	RFU	RFU	RFU	RFU	RFU	RFU	RFU	RFU	RFU	RFU	RFU	RFU	RFU	RFU	RFU	RFU	RFU	RFU	RFU	RFU	RFU	RFU	RFU	RFU	RFU	RFU	RFU	RFU	RFU	RFU	RFU	RFU	RFU	RFU	RFU	RFU	RFU
	SHAM 1		734.7	1076.6	1013	411.2	5432	491.3	2520.7	946.5	673.6	267.2	274.5	1911.1	698.7	403.5	734	150.4	137.3	552.3	6295.7	2047	346.9	333.9	582.6	734.5	5226.5	80.7	341.3	544.8	399	413.5	3113.9	420.8	519.9	669.5	528	684.8	358.4	312.1	1297.6	1721.1	613.7	98.7	599	192.1	689.9	418.3	6210.2
	SHAM 2		795.5	1259.3	1024.1	443.4	6510.5	521.1	1924.9	985.5	676.6	190.1	218.8	2311.7	691.9	339.5	675.8	137.7	133.7	549.7	7211.7	1854	273.6	252.9	643	593.8	4971.1	64.7	266.2	390	428.7	374.6	3892.2	410.3	506.9	685.3	549.5	723.5	265.7	294.7	1289.4	1851.1	806.8	103.8	593.7	175.3	681.8	403.1	6431.3
	SHAM 3		685.7	1313.9	1437.2	330.7	8919	515	2858.8	998	796.1	189.2	218.2	1476.1	737	334.1	646.7	151.6	118.4	582.3	10044.1	2243	314.1	260.6	658.6	637.2	7414.4	63.7	319.5	543	436.6	363.3	3152.5	406.7	553.6	736.5	619.7	771.8	280.1	293.9	1344.4	1922	684.6	85.2	696.3	221.5	615.9	421.6	9351.5
	SHAM 4		619.5	755.9	1742.6	255.8	8331.7	491.3	1940.7	781.9	710.8	197.5	204.8	2388.4	651.7	279.7	829.9	116	117.2	536.2	9124.5	1988.8	268.3	234.2	630.8	544.9	6544.8	71.8	372.9	407.3	501.6	300.1	3869.4	303.1	466.8	672.1	455.1	641.5	283.3	256.5	1275.3	2132.9	1275.6	84.6	584.7	190.7	573.5	390.1	10998.2
	SHAM 5		796	1068.8	568.4	380.1	3759	468.2	1433.9	790.7	523	220.8	177.5	2551.8	693.9	358.3	565	130.7	90.3	482.7	4582.4	1411.1	182	201.7	473	547.9	3766.6	62.8	216.6	202.5	356.8	409.8	11199.6	361.3	404.9	453.1	472.2	560.5	269.9	263.8	686.7	1097.9	691.4	75.5	427.5	182.5	725.9	319.7	4247.1
	SHAM 6		712.1	1197.3	839.3	342.8	5881.9	442.5	1715.5	832.5	672.2	206.5	167.9	2162.1	745.2	274	594.1	183.5	92.2	513.3	6085.4	1665.2	183	210.5	726	543.5	5070.2	56.6	190.4	210.3	322.2	415.2	7026.5	380.9	507.8	516	573.2	550.4	252.6	265.4	861.3	1216.1	488.2	71.6	469.4	140.2	700.9	307.8	5174.9
	SHAM 7		726.8	1132.6	2215.9	351	6578.1	466.2	2268.7	921	803.6	216.6	230.1	1969	623.5	334.1	1053.5	134.8	117.4	542.1	7510.3	1950.7	307.9	257.9	698.6	528	5399.7	65.9	328.4	504.5	441.6	307.9	4680.6	391.1	477.5	720.7	515.9	728.8	300.7	301.6	1229.7	1923.8	730.7	97.3	610	196	595.7	461.7	8202.7
	SHAM 8		645.7	1099.2	1882.2	275	7431.8	450.1	2201.6	938.2	735.7	186.8	202.7	2471.9	1601	305.8	746.9	124.7	113	528.7	8717.4	1988.2	284.8	254.9	645.5	517.9	6740.8	61.9	370.8	494.6	449.8	266.9	4012.7	418.4	494.8	722.4	516.9	707.2	258.8	258.8	1344.8	1952.9	762.4	93.2	612.1	183.6	581.5	412.6	10274
	SHAM 9		644.4	941.5	1608	282.9	5788.6	488.2	2464.6	891.4	637.2	196.9	229.1	2462.7	642.3	345.1	863.8	134.6	118.7	540.9	7172.3	2197.9	329.3	265.8	607.4	541.9	6142.8	70.3	326.7	602.2	421	324.9	5532.3	347.5	428.3	687.9	472.8	669.6	296.6	265.2	1137.4	1794.4	902.2	89.4	666.8	186.5	646.2	539.2	7381.3
	SHAM 10		696.2	1047.3	1876.2	340	4934.4	469.3	1952.6	805.2	636	272.5	209.4	2367.6	629.5	302.7	794.9	126.9	114.3	470.5	5991	1841.3	257.6	304.2	654.3	520.8	5204.9	63.1	757.2	486.5	425.5	421.6	5110.4	337.9	476.1	624.2	438.7	744.5	272	245.1	1085.9	1459.8	927.1	77.2	532	197	626.5	510.4	6667.7
	TBI 8 hrs 1		832	1210.8	1259.1	340.2	6635	460.4	2251	915.7	670	206.2	198	2743.8	698	320.1	714.7	141.1	105.7	497.5	8266	1751	272	281	555.4	565.1	6281.3	61.9	268	383.9	424.8	306.1	4373.3	394.1	495.4	632.2	527.5	702.5	258.7	277.6	1165.8	1654.1	697.1	80.8	601.6	175.6	603.1	379.9	7314.3
	TBI 8 hrs 2		733.8	1134.2	1517.3	388.2	5658.6	458.6	1962.8	950.5	658	241.1	235.5	2268.6	644.5	348.6	721.2	144.3	136.3	506.4	7004.6	1796.6	287.8	307	591.6	565.8	5752.3	76.1	283.9	396	410.3	297.2	3670.1	407.6	488.1	680.9	526	705.7	307	288.2	1185.8	1627.4	814.8	124.9	593.2	201.7	656	449.5	6811.5
	TBI 8 hrs 3		711.1	1003	2185.9	300.1	6763.3	504.8	2602.4	961.9	682.6	217.9	237.5	2432.7	662.9	371	703.9	141	139.6	547	8426.4	2371	334.7	273.1	585.4	634.4	7068.6	66.4	320.8	620.3	430	317.2	3261.4	378	443.1	701.1	478.5	756.3	311	273.7	1376	2001.4	757	90.2	622.7	183.9	638	415.4	8103.3
	TBI 8 hrs 4		554.1	945.9	1011.4	415.7	4630.6	511.3	1656	983.7	551.9	320	339.2	2082.8	682.2	378.4	827.7	146.5	234.5	538.3	5535.4	1787	301.2	444.4	662.9	674.6	4320.1	92.8	345.4	496.2	470.4	397.2	3594.3	448.4	493.1	638.2	578.6	697.8	347.2	349.6	1086.3	1593.9	1237.8	134.9	557.6	208.1	737.7	775.8	5625.3
	TBI 24 hrs 1		717	1071.2	2072.1	340.4	5546.7	470	2448.3	898.1	726.9	201.4	240.7	2342.8	656.3	349.8	765.7	149.4	123	496.6	7209.4	2101.1	316.4	264.9	628.3	568.9	5885	67.4	338.8	549.2	442.8	309.7	5964.4	375.7	430.5	693.3	467.2	676.5	296.3	268.2	1213.2	1698.7	847.9	89.1	599.5	218.2	650.5	441.4	7279.8
	TBI 24 hrs 2		668	1037.2	2003.3	331.7	5271.4	488.9	1962.4	948.4	820.1	225	234.6	2415	645.1	346.9	845.9	144.5	116	473.1	7166.2	1886.7	285.8	325.1	629.6	581.1	6018.3	77.8	378.4	441.2	454.7	327.4	5979.6	362.8	458.6	689.6	469.3	699.4	286	292.9	1257.1	1824.8	757.3	91	560.8	235.2	638.6	460.4	8138.4
	TBI 24 hrs 3		694.2	947	1575.5	292.9	6384.5	488	2082.6	883.5	690.4	188.3	206.8	2205.3	720.3	322.1	706.1	132.8	112.7	536.4	7745	2073.9	264.9	244	549.1	563.9	6922.7	64.4	303.1	444.6	389.4	298.3	5614.8	348.9	412.8	684.7	468.1	652.4	287.9	252.3	1232.4	1881.8	1036.6	225.1	585.1	180.3	626.7	428	8283.2
	TBI 24 hrs 4		654.5	955.5	1091.3	361.2	5716.8	531.8	1992.5	902.3	612.2	199.5	233.4	2306.5	656.8	332.7	683.9	139.1	120.4	485.7	6675.5	1946.4	267.3	253	581.3	579.5	5305.5	72	303.9	451.4	436.4	413.1	4573.1	368.1	428	660	463.4	686.4	297.6	274.9	1110.4	1936.4	941.6	99.3	567.9	202.7	659.1	462.4	6621.9
	TBI 72 hrs 1		842.5	1325.6	1679.1	368.2	6825.5	502.6	2336	1008.6	690.9	201.3	201.2	2280.2	725.1	321.9	765.5	136.8	112.8	514.1	8580.9	2086.2	286.4	247.4	595	543.9	7302.5	62.3	286.3	462.4	430.1	283.3	5159.9	412	492.3	726.1	651.5	754.5	272.7	281.5	1439.4	2435.3	733.7	71.9	623	178.5	612.6	410.1	8341.2
	TBI 72 hrs 2		843.5	1193.5	1855.1	346.9	7087	463.4	2122.5	937.9	697.2	192.6	193.9	2415.7	681	305.9	710.7	123.8	108.8	510.5	9037.5	1995	281.3	270.5	879	575.1	7386.6	73.9	331.7	429	424	258.3	3853.9	384.7	506.2	701.7	516.8	711.1	272.5	276.2	1337.1	2087	902.8	78.8	600.9	176	619.4	416	9973.5
	TBI 72 hrs 3		611.7	947.4	1905.4	305.5	5310.8	534.3	1948.6	944.5	726.1	204.3	222.3	2466	681.4	352.9	759.3	150.5	115.1	942.6	7282.9	2042.7	271	280.6	860.7	573.2	6207.2	65	443.5	429.5	456	303	5159.7	361.1	410.9	695.6	481.9	663.5	291.9	345.8	1304.9	1772.8	1114.8	93	557.4	204.3	687.9	597.6	8276.4
	TBI 72 hrs 4		693.9	1061.7	1135.4	342.1	5791.7	504.5	2140	924.9	618.9	213.9	221.8	2389.6	660.1	325.3	616.3	134.2	118.1	514.4	7078	1863.1	281.6	258.1	556	604.4	5425.1	72.9	366.8	443	417.5	371.9	4246.5	367.3	440.4	636	483.9	691.4	273	262.7	1146	1581.4	956	87.8	567.8	182.1	632.4	382.3	6928.6
	TBI 7 days 1		744.6	1169.2	1542.9	358.8	5534.2	488	2088.1	890.7	660.7	219.7	228.1	2188.6	640.9	380.6	772.9	140.2	126.1	486.4	7116.8	1852.2	286.4	259	634	589.5	5633.7	72.7	330.4	444.6	471.7	310.4	6992.5	405.9	454.4	712.6	482.8	737.4	281.3	282.6	1234	1740.9	909.7	97	558.6	298.3	642.6	423.4	8159.2
	TBI 7 days 2		768.6	1220	1795.5	364.4	6374.7	519.5	2182.9	945.1	709.1	209.9	209	2191.6	684.2	362.3	702.4	130	126	569.3	8159.3	1885.9	292.2	259.6	657.8	1346	6355.1	63.7	308.9	435.1	470.3	293	3552.1	488.7	493.5	731.1	516.4	727.1	267.6	287.3	1383.3	1953.8	923.7	78.5	615.9	387.7	647.5	456	9008.2
	TBI 7 days 3		943.8	997.5	1521.8	286.7	5858.2	679.3	2280.4	870.6	789	259.9	262.3	2598.5	669.4	374.6	722.1	150	122.8	831.2	7036	1908.6	302.7	489.8	624.5	597.8	5840.3	65.4	668.6	535.3	500.9	365	2989.7	366.9	439.7	2028.2	482.5	724.1	285.5	269.6	1374.8	1666.9	938.6	167	613.5	172.9	628.3	434.6	7673.6
	TBI 7 days 4		779.4	1316.2	1583.9	358	6259.5	974.9	2341.1	988.2	654.5	185.2	201.7	2820.9	701.3	378.9	750.8	139.8	117	483.6	7420.4	2161.6	275.3	261.9	613	541.6	6425.7	57.6	402.8	501.2	459.9	425.1	4252.6	415.1	497.2	670.8	512.4	760.9	263.4	279.6	1266	1644.7	909.7	78.9	567.8	166.5	645.3	464.2	8442.3
	TBI 14 days 1		765.7	1102.2	2509.1	362.8	5925.9	467.6	2585.1	875	740.9	222.3	228.5	2078.1	627	348.5	756.6	140.3	125.8	527.3	7537.1	1990.5	332.3	280.3	591.4	576.9	5933.9	68.5	337.8	557.5	403.2	304.6	4697.2	386.5	449.6	665.9	481.3	688.9	319.3	270.1	1176	1822.7	634.7	84	585.2	209.9	625.6	398.6	8265.9
	TBI 14 days 2		689.1	1167.5	1623.8	370.3	6162.5	445.1	1910.3	936.9	732.3	257.1	256.4	2135.8	683.6	327.8	698.1	128	140.4	501.2	7275.5	1688.1	266.6	260.1	694.2	559.2	5358.2	78.9	441.8	403.8	430	313.4	4392.5	374.7	522.1	656.1	531.4	770.2	311.1	277.8	1312.3	1631.7	771.8	86.9	583.6	202.5	664.6	512.8	9680.1
	TBI 14 days 3		612.5	953.4	2211.7	276.5	6566.2	483.4	1887.6	897.4	674.5	201.5	208.6	2812.7	664.7	297	769.1	130.9	110.8	709.9	7827.7	1927.2	270.5	267.8	620.6	538.9	5925.9	69.5	535.3	467.9	544.5	276.4	5004.2	379.2	514	668.7	477.9	690.2	279.1	265	1257.7	1878.7	933.6	85.2	568	193.5	596.6	394.2	9865.1
	TBI 14 days 4		856.2	1191.5	1368.7	324.7	5968.9	494.4	2264.3	888.6	619.3	186.3	191.8	3046.9	671.6	319.2	677	145.9	110.8	2652.8	7599.6	2228.2	262.5	237.7	613	515	6591.3	55.7	307.2	432.5	660.1	461.7	4194.7	376.9	484.8	615.6	490	678.8	250	248.1	1265.4	1686.7	851	82.9	539.7	166.4	614.4	385.4	7779.9
	TBI 30 days 1		757.2	1249.9	2226.6	343.9	6987.9	415.5	3753.5	753.9	818	196.5	200.6	942.8	532.6	330	617.8	156.5	116.8	510	10972.6	2701.8	347.1	320.8	695.9	569.2	9020.6	70.3	285.6	576.3	425.1	340.5	2184.2	376.6	533.4	649.6	574.2	787	292.8	249.5	1261.5	1814.7	687.5	78.8	639.1	178.2	580.4	499.6	14357.8
	TBI 30 days 2		639.3	959.3	1684.4	249.4	8253.9	459.8	2469.3	825.5	776.1	196	208.6	1793.6	686.5	303.9	741.1	157.2	135	807	9533.7	2057.5	300.9	233.8	599.1	526.4	7560.5	65.1	290.8	407.9	355.3	324.9	2905	352.5	464.8	627.2	506.3	636.9	283.4	252.2	1383.2	1961.5	575.5	88.3	622.6	184.4	578.9	375.2	8359.1
	TBI 30 days 3		635.7	1103.5	1776.4	296.4	6475.3	576.3	2029	1013.3	712.2	197.3	217.8	2658	690.1	319.4	707.3	128.4	119.9	518	7701.5	1922.8	267.9	268.6	782.5	548.7	5801.8	67	347.1	467.2	449.8	311.7	5271.2	430.5	463.9	727.6	482.8	728.7	265	283.1	1299.4	1681	959.2	99.1	630.7	196.6	624.8	445.3	9200.5
	TBI 30 days 4		802.8	1357.6	1225.3	378.6	6346.2	499.1	2433.5	1377.9	660.9	183.2	206.9	2825.9	693.6	311.7	765.7	132.4	119.7	527.6	7828.4	2004.7	387.7	251.5	656.1	551.7	5966.6	56.9	325.5	540	459.6	430.4	3302.8	420	486.5	686.3	505	773.4	273.9	279.8	1303.9	1704.1	802.6	157.8	582.3	174.2	620.8	406.4	9502.8
[truncated: 1,275 more columns]
