# Supplementary material for: Time-dependent cytokine and chemokine changes in mouse cerebral cortex following a mild traumatic brain injury
Source: eLife. 2020 Aug 17;9:e55827. doi: 10.7554/eLife.55827 (PMC7473773; doi:10.7554/eLife.55827)
Supplement: Supplementary file 2. — Provided is a list proteins that were significantly changed in the cortical proteins that were common between the cortical array and SOMAscan assay. [file elife-55827-supp2.xlsx]

## Sheet: Sheet2
	Supplementary File 2. Correlations between cortical tissue and NEV proteins
	Protein of Interest	Correlation	p value
	IL-10	0.560182	0.860226
	IL-1 RN	0.465001	0.53522
	L-Selectin	0.338802	0.829851
	Progranulin	0.331581	0.832908
	BLC	0.324123	0.289056
	IL-17B	0.321317	0.982433
	bFGF	0.259757	0.683522
	PRO-MMP-9	0.25823	0.300388
	TROY	0.242405	0.290965
	Renin 1	0.242389	0.342951
	Prolactin	0.236557	0.530541
	IL-25	0.229115	0.235439
	Decorin	0.225418	0.980273
	LEPTIN	0.205862	0.188808
	P-CADHERIN	0.20085	0.367849
	TGFB1	0.18299	0.58194
	OPG	0.174892	0.717221
	Clusterin	0.169345	0.430173
	TWEAKR	0.16785	0.626682
	CRP	0.166187	0.0196192
	Adiponectin	0.164347	0.855564
	Marapsin	0.162391	0.725756
	Endoglin	0.150003	0.908076
	IL-17A	0.13847	0.43848
	MFG-E8	0.137358	0.66391
	IL-5	0.12564	0.558815
	TCA3	0.125501	0.531885
	CD40 L	0.122592	0.993219
	ALK-1	0.1215	0.99317
	TNF-RII	0.119819	0.588787
	gp130	0.113146	0.577901
	TECK	0.112799	0.655641
	Lipocalin 2	0.0973045	0.178543
	Dtk	0.0965947	0.882458
	RANTES	0.0841822	0.682571
	CD27	0.0825249	0.454193
	IL-13	0.0796402	0.0252936
	TACI	0.0666915	0.899976
	IL-4	0.0662199	0.365415
	IL-7R	0.0525722	0.184405
	CD36	0.0442842	0.921133
	GAS-1	0.0375217	0.861138
	MIP-3b	0.0285724	0.0296682
	IL-20	0.0251178	0.161593
	Artemin	0.0242248	0.154347
	IL-1 R4	0.0159833	0.0616626
	Periostin	0.0158761	0.337114
	Eotaxin	0.0101341	0.1071
	CD30 L	0.00453395	0.833274
	Granzyme B	0.00431216	0.271858
	IGFBP-2	0.00262942	0.647453
	PDGF-AA	-0.00760996	0.253009
	ADAMT S1	-0.0122111	0.123525
	Galectin-7	-0.0187404	0.524671
	ANG-3	-0.0268867	0.419047
	Fractalkine	-0.0371865	0.763768
	CXCL16	-0.0414714	0.265668
	IFNg R1	-0.0446578	0.350915
	MMP-10	-0.0458632	0.686456
	sRFP-3	-0.0510259	0.490726
	IL-2 RA	-0.0513484	0.534706
	NOV	-0.0639157	0.229899
	btc	-0.0689925	0.513777
	HGF	-0.0694371	0.388221
	IL-1b	-0.0757453	0.586458
	HAI-1	-0.0911353	0.308913
	Eotaxin-2	-0.0980964	0.81741
	OPN	-0.0982842	0.529135
	TRANCE	-0.110691	0.474255
	IL-6	-0.112001	0.0243279
	IL-7	-0.12196	0.813119
	IGFBP-6	-0.122669	0.440925
	IL-1a	-0.139703	0.558553
	CTLA4	-0.141751	0.184115
	MMP-2	-0.14706	0.729068
	FLT-3L	-0.15235	0.175201
	BAFF-R	-0.153416	0.96957
	I-TAC	-0.154207	0.720832
	IL-9	-0.162677	0.962582
	Galectin-3	-0.163353	0.701253
	Tryptase Epsilon	-0.169772	0.628036
	MIP-1A	-0.205861	0.277068
	CD48	-0.214631	0.283409
	FAS L	-0.216453	0.436923
	THPO	-0.240503	0.877913
	E-Cadherin	-0.251416	0.386994
	Chemerin	-0.252012	0.0908487
	GITR	-0.254996	0.342113
	OX40 Antigen Ligand	-0.264872	0.787173
	DLL4	-0.289066	0.42602
	MIG	-0.311501	0.790536
	C5a	-0.324775	0.982821
	ICAM-1	-0.346991	0.820895
	TCK-1	-0.403159	0.932522
