# Supplementary material for: Time-dependent cytokine and chemokine changes in mouse cerebral cortex following a mild traumatic brain injury
Source: eLife. 2020 Aug 17;9:e55827. doi: 10.7554/eLife.55827 (PMC7473773; doi:10.7554/eLife.55827)
Supplement: Table 2—source data 1. [file elife-55827-table2-data1.xlsx]

## Sheet: Table 2 EV related
Source data for Table 2
	sham - NEV counts		8 hrs - NEV counts		24 hrs - NEV counts		72 hrs - NEV counts		7 days - NEV counts		14 days - NEV counts		30 days - NEV counts
	Concentration (AVG)	Conc *100 dilution	Concentration (AVG)	Conc *100 dilution	Concentration (AVG)	Conc *100 dilution	Concentration (AVG)	Conc *100 dilution	Concentration (AVG)	Conc *100 dilution	Concentration (AVG)	Conc *100 dilution	Concentration (AVG)	Conc *100 dilution
	284000000	28400000000	761000000	76100000000	761000000	76100000000	843000000	84300000000	595000000	59500000000	460000000	46000000000	1260000000	126000000000
	1000000000	100000000000	271000000	27100000000	570000000	57000000000	712000000	71200000000	491000000	49100000000	813000000	81300000000	833000000	83300000000
	653000000	65300000000	422000000	42200000000	626000000	62600000000	262000000	26200000000	186000000	18600000000	377000000	37700000000	237000000	23700000000
	539000000	53900000000	1160000000	116000000000	208000000	20800000000	153000000	15300000000	271000000	27100000000	118000000	11800000000	1040000000	104000000000
	325000000	32500000000
	591000000	59100000000
	851000000	85100000000
	1080000000	108000000000
	871000000	87100000000
	633000000	63300000000
	sham - NEV size		8 hrs - NEV size		24 hrs - NEV size		72 hrs - NEV size		7 days - NEV size		14 days - NEV size		30 days - NEV size
	245.6		191.3		164.6		211.9		173.5		187.3		189
	196.2		203.3		183.2		290.9		176.7		186.2		180.6
	163.6		162		164.6		165.7		94.1		151.4		139.1
	136.3		257.4		145.2		170.6		151.8		158.2		149.6
	153.5
	166.9
	188.2
	207.2
	115.7
	146.6
